# Supplementary material for: Characterization of the nucleophilic reactivities of thiocarboxylate, dithiocarbonate and dithiocarbamate anions
Source: Royal Society of Chemistry journal article supplement (doi:10.1039/c1ob06245j), 2011-01-01

– Electronic Supplementary Information (ESI) –

# **Characterization of the nucleophilic reactivities of thiocarboxylate, dithiocarbonate and dithiocarbamate anions**

Xin-Hua Duan,<sup>a,b</sup> Biplab Maji<sup>b</sup> and Herbert Mayr\*<sup>b</sup>

<sup>a</sup> *Department of Applied Chemistry, Faculty of Science, Xi'an Jiaotong University,*

*Xi'an 710049, Peoples Republic China*

<sup>b</sup> *Department Chemie, Ludwig-Maximilians-Universität München, Butenandtstr.*

*5-13 (Haus F), 81377 München, Germany*

*Herbert.Mayr@cup.uni-muenchen.de*

## Table of Contents

|                                 |     |
|---------------------------------|-----|
| 1. General                      | S3  |
| 2. Product Studies              | S4  |
| 3. Kinetics                     | S11 |
| 4. References                   | S47 |
| 5. Copies of NMR and IR Spectra | S48 |

## 1. General

### *Materials.*

Commercially available acetonitrile (VWR, Prolabo, HPLC-gradient grade) was used. The benzhydrylium tetrafluoroborates  $\text{Ar}_2\text{CH}^+\text{BF}_4^-$  were prepared as described before.<sup>S1</sup> The phosphonium salts of benzhydrylium tetrafluoroborates (P-salt) and benzhydryl chlorides were synthesized according to literature procedures.<sup>S2,S3</sup> Potassium thioacetate (**1a**, Aldrich, >98%), potassium *O*-ethyl dithiocarbonate (**1b**, Aldrich, >98%) and 18-crown-6 (Aldrich, 98%) were purchased and used directly without further purification. The other thioester salts **1c-h** were prepared according to the literature procedure.<sup>S4</sup>

### *Analytics.*

<sup>1</sup>H- and <sup>13</sup>C-NMR spectra were recorded on *Varian* NMR-systems (400 MHz) in CD<sub>3</sub>CN or d<sub>6</sub>-DMSO and the chemical shifts in ppm refer to the solvent residual signal as internal standard ( $\delta_{\text{H}}(\text{CDCl}_3) = 7.24$ ,  $\delta_{\text{C}}(\text{CDCl}_3) = 77.2$ , or  $\delta_{\text{H}}(\text{DMSO}) = 2.50$ ,  $\delta_{\text{C}}(\text{DMSO}) = 39.5$ ). For reasons of simplicity, the <sup>1</sup>H-NMR signals of AA'BB'-spin systems of *p*-disubstituted aromatic rings are treated as doublets.

## 2. Product Studies

### 2.1 Product studies for the reactions of the 1–3 with the benzhydrylium ions

The reactions of **1–3** with the reference electrophiles ( $\text{Ar}_2\text{CH}^+$ ) were performed under exclusion of moisture in an atmosphere of dry nitrogen in carefully dried Schlenk glassware.

General procedure (GP):

At room temperature a solution of benzhydrylium ion ( $\text{Ar}_2\text{CH}^+\text{BF}_4^-$ ) (31 mg, 0.091 mmol) in MeCN (1.5 mL) was added to a solution of **1a** (10 mg, 0.088 mmol) in DMSO (0.5 mL) under the nitrogen. The resulting mixture was stirred for 1h. The crude product was washed with water, extracted in EtOAc, dried over  $\text{Na}_2\text{SO}_4$ , concentrated under reduced pressure, and purified by column chromatography to afford the products.

**S-(Bis(4-(dimethylamino)phenyl)methyl) ethanethioate** was obtained from **1** (10 mg, 0.088 mmol) and  $(\text{dma})_2\text{CHBF}_4$  (31 mg, 0.091 mmol) in dry MeCN/DMSO (2 mL); purification was achieved by column chromatography on silica gel; 25 mg (0.076 mmol, 85%).

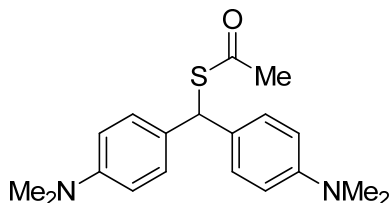

$^1\text{H}$  NMR (300 MHz,  $\text{CDCl}_3$ ):  $\delta$  7.24 (d,  $J = 6.7$  Hz, 4 H, Ar), 6.70 (d,  $J = 6.8$  Hz, 4 H, Ar), 5.89 (s, 1 H,  $\text{Ar}_2\text{CH-S}$ ), 2.95 (s, 12 H,  $\text{N}(\text{CH}_3)_2$ ), 2.35 (s, 3 H,  $\text{CH}_3$ ) ppm.

$^{13}\text{C}$  NMR (75.5 MHz,  $\text{CDCl}_3$ ):  $\delta$  194.8 (s,  $\text{C}=\text{O}$ ), 149.7 (s, Ar), 129.5 (s, Ar), 129.2 (d, Ar), 112.6 (d, Ar), 51.4 (d,  $\text{Ar}_2\text{CH-S}$ ), 40.8 (q,  $\text{N}(\text{CH}_3)_2$ ), 30.5 (q,  $\text{CH}_3$ ) ppm.

IR (ATR)  $\tilde{\nu}$  ( $\text{cm}^{-1}$ ): 2885, 2800, 1685, 1611, 1519, 1480, 1444, 1350, 1164, 1131, 1105, 948, 819, 802, 759.

HRMS (ESI, positive): Calculated for  $C_{19}H_{25}O_1N_2^{32}S_1$  [ $M + H^+$ ] is 329.1682: Found 329.1682. Calculated for  $C_{17}H_{21}N_2$  [ $M - CH_3COS^-$ ] is 253.1699; found 253.1698.

**S-(Bis(4-(pyrrolidin-1-yl)phenyl)methyl) ethanethioate** was obtained from the thioester salt **1** (10 mg, 0.088 mmol) and  $(pyr)_2CHBF_4$  (35 mg, 0.089 mmol) in dry MeCN/DMSO (2 mL); purification was achieved by column chromatography on silica gel; 23 mg (0.060 mmol, 68%).

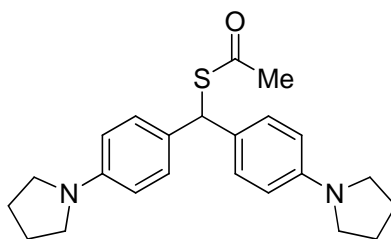

$^1H$  NMR (300 MHz,  $CDCl_3$ ):  $\delta$  7.18 (d,  $J = 8.7$  Hz, 4 H, Ar), 6.47 (d,  $J = 8.7$  Hz, 4 H, Ar), 5.84 (s, 1 H,  $Ar_2CH-S$ ), 3.32-3.26 (m, 8 H,  $NCH_2CH_2$ ), 2.29 (s, 3 H,  $CH_3$ ), 1.98-1.94 (m, 8 H,  $NCH_2CH_2$ ) ppm.

$^{13}C$  NMR (75.5 MHz,  $CDCl_3$ ):  $\delta$  194.9 (s,  $C=O$ ), 147.1 (s, Ar), 129.3 (d, Ar), 128.4 (s, Ar), 111.6 (d, Ar), 51.7 (d,  $Ar_2CH-S$ ), 47.8 (t,  $NCH_2CH_2$ ), 30.6 (q,  $CH_3$ ), 25.7 (t,  $NCH_2CH_2$ ) ppm.

IR (ATR)  $\tilde{\nu}$  ( $cm^{-1}$ ): 2966, 2833, 2360, 2341, 1683, 1610, 1518, 1486, 1370, 1180, 1133, 1104, 964, 798, 769.

HRMS (ESI, positive): Calculated for  $C_{17}H_{21}N_2$  [ $M - CH_3COS^-$ ] is 253.1699; found 253.1698.

#### Reaction of potassium *O*-ethyl dithiocarbonate (**2a**) with $(dma)_2CH^+BF_4^-$ :

**2a** (13 mg, 0.081 mmol) and  $(dma)_2CHBF_4$  (28 mg, 0.081 mmol) were mixed in an NMR tube in  $d_6$ -DMSO, and the mixture was analyzed by NMR spectroscopy.

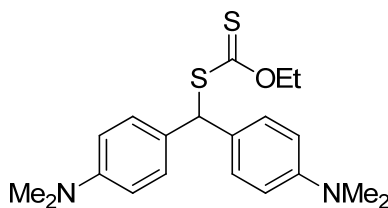

$^1H$  NMR (400 MHz,  $d_6$ -DMSO):  $\delta$  7.18 (d,  $J = 8.7$  Hz, 4 H, Ar), 6.67 (d,  $J = 8.7$  Hz, 4

H, Ar), 5.92 (s, 1 H, Ar<sub>2</sub>CH-S), 4.49 (q,  $J = 7.1$  Hz, 2 H, CH<sub>2</sub>), 2.86 (s, 12 H, N(CH<sub>3</sub>)<sub>2</sub>), 1.21 (t,  $J = 7.1$  Hz, 3 H, CH<sub>3</sub>) ppm.

<sup>13</sup>C NMR (100 MHz, d<sub>6</sub>-DMSO):  $\delta$  212.3 (s, C=S), 149.4 (s, Ar), 128.7 (d, Ar), 127.4 (s, Ar), 112.2 (d, Ar), 69.9 (t, CH<sub>2</sub>), 56.9 (d, Ar<sub>2</sub>CH-S), 40.1 (q, N(CH<sub>3</sub>)<sub>2</sub>), 13.3 (q, CH<sub>3</sub>) ppm.

IR (ATR)  $\tilde{\nu}$  (cm<sup>-1</sup>): 2922, 2852, 2360, 2341, 1612, 1520, 1444, 1352, 1224, 1164, 1046, 948, 801.

### Reaction of potassium *N,N*-dimethyldithiocarbamate (**2a**) with (dma)<sub>2</sub>CH<sup>+</sup>BF<sub>4</sub><sup>-</sup>:

**2a** (13 mg, 0.081 mmol) and (dma)<sub>2</sub>CHBF<sub>4</sub> (28 mg, 0.081 mmol) were mixed in an NMR tube in d<sub>6</sub>-DMSO and the mixture was analyzed by NMR spectroscopy.

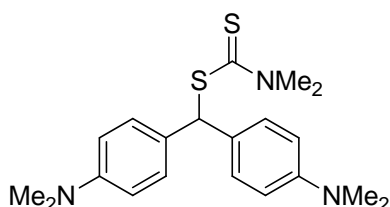

<sup>1</sup>H NMR (400 MHz, d<sub>6</sub>-DMSO):  $\delta$  7.15 (d,  $J = 8.8$  Hz, 4 H, Ar), 6.67 (d,  $J = 8.8$  Hz, 4 H, Ar), 6.18 (s, 1 H, Ar<sub>2</sub>CH-S), 3.41 (s, 3 H, C(S)N(CH<sub>3</sub>)<sub>2</sub>) 3.33 (s, 3 H, C(S)N(CH<sub>3</sub>)<sub>2</sub>) 2.86 (s, 12 H, ArN(CH<sub>3</sub>)<sub>2</sub>) ppm.

<sup>13</sup>C NMR (100 MHz, d<sub>6</sub>-DMSO):  $\delta$  194.1 (s, C=S), 149.1 (s, Ar), 129.0 (d, Ar), 114.6 (s, Ar), 112.3 (d, Ar), 59.3 (d, Ar<sub>2</sub>CH-S), 44.7 (q, C(S)N(CH<sub>3</sub>)<sub>2</sub>) 41.1 (q, C(S)N(CH<sub>3</sub>)<sub>2</sub>) , 40.2 (q, ArN(CH<sub>3</sub>)<sub>2</sub>) ppm.

### 2.2 Reaction of **1–3** with (ani)<sub>2</sub>CHCl or (ani)<sub>2</sub>CHBr

General procedure (GP):

At room temperature a solution of (ani)<sub>2</sub>CHCl or (ani)<sub>2</sub>CHBr in MeCN (1.5 mL) was added to a solution of **1–3** in DMSO or MeCN (0.5 mL) under the nitrogen. The resulting mixture was stirred for 1 h. The crude product was washed with water, extracted in EtOAc, dried over Na<sub>2</sub>SO<sub>4</sub>, concentrated under reduced pressure, and purified by chromatography to afford the products.

**Thioacetic acid *S*-[bis-(4-methoxy-phenyl)-methyl] ester<sup>S5</sup>** was obtained from **1a** (14 mg, 0.12 mmol) and the (ani)<sub>2</sub>CHCl (32 mg, 0.12 mmol) in dry MeCN/DMSO (2 mL); purification was achieved by column chromatography on silica gel; 29 mg (0.096 mmol, 80%).

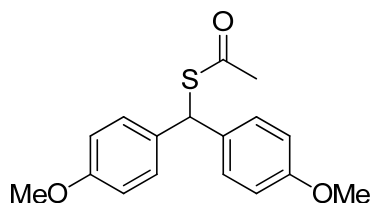

<sup>1</sup>H NMR (300 MHz, CDCl<sub>3</sub>): δ 7.27 (d, *J* = 8.4 Hz, 4 H, Ar), 6.86 (d, *J* = 8.7 Hz, 4 H, Ar), 5.90 (s, 1 H, Ar<sub>2</sub>CH-S), 3.80 (s, 6 H, OCH<sub>3</sub>), 2.35 (s, 3 H, CH<sub>3</sub>) ppm.

<sup>13</sup>C NMR (75.5 MHz, CDCl<sub>3</sub>): δ 194.3 (s, C=O), 158.9 (s, Ar), 133.5 (s, Ar), 129.5 (d, Ar), 114.1 (d, Ar), 55.5 (q, OCH<sub>3</sub>), 51.0 (d, Ar<sub>2</sub>CH-S), 30.5 (q, CH<sub>3</sub>) ppm.

IR (ATR)  $\tilde{\nu}$  (cm<sup>-1</sup>): 2955, 2930, 2836, 2361, 2340, 1689, 1509, 1463, 1302, 1248, 1176, 1134, 1109, 1033, 956, 817, 768.

HRMS (EI): Calculated for C<sub>15</sub>H<sub>15</sub>O<sub>2</sub><sup>+</sup> [M – CH<sub>3</sub>COS<sup>-</sup>] is 227.1067; found 227.1058.

***S*-(Bis(4-methoxyphenyl)methyl) O-ethyl carbonodithioate** was obtained from **2a** (16 mg, 0.10 mmol) and the (ani)<sub>2</sub>CHBr (31 mg, 0.090 mmol) in dry MeCN/DMSO (2 mL); purification was achieved by column chromatography on silica gel; 16 mg (0.041 mmol, 46%).

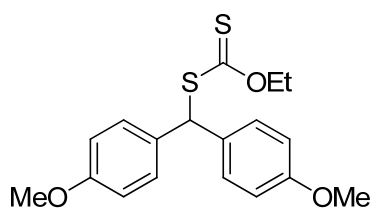

<sup>1</sup>H NMR (400 MHz, CDCl<sub>3</sub>): δ 7.28-7.23 (m, 4 H, Ar), 6.84-6.80 (m, 4 H, Ar), 6.00 (s, 1 H, Ar<sub>2</sub>CH-S), 4.53 (q, *J* = 7.1 Hz, 2 H, CH<sub>2</sub>), 3.76 (s, 6 H, OCH<sub>3</sub>), 1.27 (t, *J* = 7.1 Hz, 3 H, CH<sub>3</sub>) ppm.

<sup>13</sup>C NMR (100 MHz, CDCl<sub>3</sub>): δ 212.9 (s, C=S), 159.0 (s, Ar), 132.2 (s, Ar), 129.8 (d, Ar), 114.1 (d, Ar), 70.0 (t, CH<sub>2</sub>), 57.5 (d, Ar<sub>2</sub>CH-S), 55.5 (q, OCH<sub>3</sub>), 13.8 (q, CH<sub>3</sub>) ppm.

IR (ATR)  $\tilde{\nu}$  ( $\text{cm}^{-1}$ ): 2932, 2836, 1738, 1610, 1510, 1462, 2366, 1302, 1249, 1175, 1111, 1044, 816.

**Bis(4-methoxyphenyl)methyl dimethylcarbamodithioate** was obtained from **2a** (21 mg, 0.13 mmol) and the  $(\text{ani})_2\text{CHBr}$  (41 mg, 0.13 mmol) in dry MeCN/DMSO (2 mL); purification was achieved by column chromatography on neutral  $\text{Al}_2\text{O}_3$ ; 35 mg (0.10 mmol, 78%).

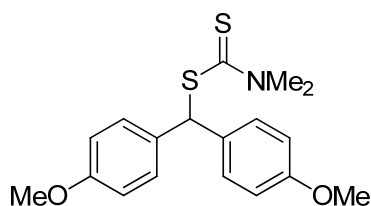

$^1\text{H}$  NMR (400 MHz,  $\text{CDCl}_3$ ):  $\delta$  7.30 (d,  $J = 8.6$  Hz, 4 H, Ar), 6.82 (d,  $J = 8.8$  Hz, 4 H, Ar), 6.43 (s, 1 H,  $\text{Ar}_2\text{CH-S}$ ), 3.76 (s, 6 H,  $\text{OCH}_3$ ), 3.49 (s, 3 H,  $\text{NCH}_3$ ), 3.34 (s, 3 H,  $\text{NCH}_3$ ) ppm.

$^{13}\text{C}$  NMR (100 MHz,  $\text{CDCl}_3$ ):  $\delta$  195.8 (s,  $\text{C}=\text{S}$ ), 158.8 (s, Ar), 133.1 (s, Ar), 130.1 (d, Ar), 113.9 (d, Ar), 59.7 (d,  $\text{Ar}_2\text{CH-S}$ ), 55.4 (q,  $\text{OCH}_3$ ), 45.5 (q,  $\text{NCH}_3$ ), 41.6 (q,  $\text{NCH}_3$ ) ppm.

IR (ATR)  $\tilde{\nu}$  ( $\text{cm}^{-1}$ ): 2932, 1608, 1508, 1374, 1301, 1246, 1174, 1146, 1110, 1032, 983, 907, 833, 816, 726, 647.

**Bis(4-methoxyphenyl)methyl pyrrolidine-1-carbodithioate** was obtained from the **3b** (22 mg, 0.12 mmol) and the  $(\text{ani})_2\text{CHCl}$  (32 mg, 0.12 mmol) in dry MeCN/DMSO (2 mL); purification was achieved by column chromatography on neutral  $\text{Al}_2\text{O}_3$ ; 35 mg (0.094 mmol, 78%).

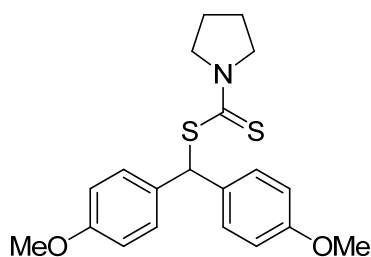

$^1\text{H}$  NMR (400 MHz,  $\text{CDCl}_3$ ):  $\delta$  7.32-7.28 (m, 4 H, Ar), 6.84-6.80 (m, 4 H, Ar), 6.53 (s, 1 H,  $\text{Ar}_2\text{CH-S}$ ), 3.93-3.87 (m, 2 H,  $\text{NCH}_2\text{CH}_2$ ), 3.76 ( $2 \times$  s, 6 H,  $\text{OCH}_3$ ), 3.65-3.61 (m,



2 H, NCH<sub>2</sub>CH<sub>2</sub>), 2.06-1.99 (m, 2 H, NCH<sub>2</sub>CH<sub>2</sub>), 1.96-1.89 (m, 2 H, NCH<sub>2</sub>CH<sub>2</sub>) ppm.

<sup>13</sup>C NMR (100 MHz, CDCl<sub>3</sub>): δ 191.5 (s, C=S), 158.8 (s, Ar), 133.4 (s, Ar), 130.1 (d, Ar), 114.0 (d, Ar), 58.3 (d, Ar<sub>2</sub>CH-S), 55.4 (q, OCH<sub>3</sub>), 55.2 (t, NCH<sub>2</sub>CH<sub>2</sub>), 50.7 (t, NCH<sub>2</sub>CH<sub>2</sub>), 26.2 (t, NCH<sub>2</sub>CH<sub>2</sub>), 24.4 (t, NCH<sub>2</sub>CH<sub>2</sub>) ppm.

IR (ATR)  $\tilde{\nu}$  (cm<sup>-1</sup>): 2953, 2835, 1606, 1582, 1508, 1461, 1431, 1329, 1302, 1247, 1174, 1110, 1032, 1006, 956, 816, 770.

**Bis(4-methoxyphenyl)methyl morpholine-4-carbodithioate** was obtained from **3e** (20 mg, 0.10 mmol) and the (ani)<sub>2</sub>CHBr (31 mg, 0.10 mmol) in dry MeCN/DMSO (2 mL); purification was achieved by column chromatography on neutral Al<sub>2</sub>O<sub>3</sub>; 29 mg (0.074 mmol, 74%).

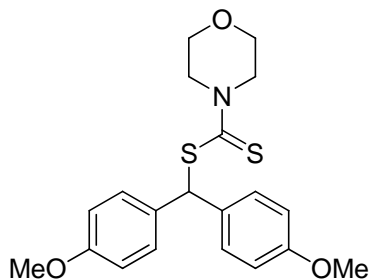

<sup>1</sup>H NMR (400 MHz, CDCl<sub>3</sub>): δ 7.31-7.27 (m, 4 H, Ar), 6.84-6.81 (m, 4 H, Ar), 6.49 (s, 1 H, Ar<sub>2</sub>CH-S), 4.33-3.97 (br. m, 4 H, CH<sub>2</sub>), 3.76 (s, 6 H, OCH<sub>3</sub>), 3.72-3.70 (m, 4 H, CH<sub>2</sub>) ppm.

<sup>13</sup>C NMR (100 MHz, CDCl<sub>3</sub>): δ 196.4 (s, C=S), 159.1 (s, Ar), 133.1 (s, Ar), 130.2 (d, Ar), 114.1 (d, Ar), 66.5 (t, CH<sub>2</sub>), 59.0 (d, Ar<sub>2</sub>CH-S), 55.5 (q, OCH<sub>3</sub>), 51.1 (t, CH<sub>2</sub>) ppm.

IR (ATR)  $\tilde{\nu}$  (cm<sup>-1</sup>): 2960, 2928, 2836, 1607, 1582, 1509, 1462, 1419, 1301, 1248, 1229, 1175, 1113, 1030, 996, 834, 816, 770.

**Bis(4-methoxyphenyl)methyl 4-methylpiperazine-1-carbodithioate** was obtained from **3d** (21 mg, 0.10 mmol) and the (ani)<sub>2</sub>CHBr (31 mg, 0.10 mmol) in dry MeCN/DMSO (2 mL); purification was achieved by column chromatography on neutral Al<sub>2</sub>O<sub>3</sub>; 34 mg (0.084 mmol, 84%).

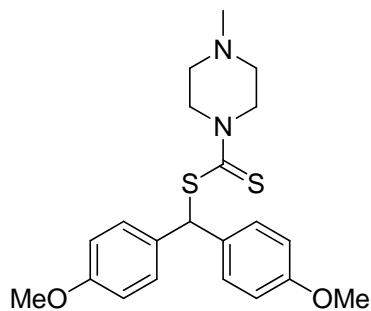

$^1\text{H}$  NMR (300 MHz,  $\text{CDCl}_3$ ):  $\delta$  7.29 (d,  $J = 8.4$  Hz, 4 H, Ar), 6.82 (d,  $J = 8.8$  Hz, 4 H, Ar), 6.48 (s, 1 H,  $\text{Ar}_2\text{CH-S}$ ), 4.25-3.99 (m, 4 H,  $\text{CH}_3\text{NCH}_2\text{CH}_2$ ), 3.75 (s, 6 H,  $\text{OCH}_3$ ), 2.46-2.43 (m, 4 H,  $\text{CH}_3\text{NCH}_2\text{CH}_2$ ) 2.29 (s, 3 H,  $\text{NCH}_3$ ) ppm.

$^{13}\text{C}$  NMR (75.5 MHz,  $\text{CDCl}_3$ ):  $\delta$  195.6 (s,  $\text{C=S}$ ), 158.8 (s, Ar), 133.0 (s, Ar), 130.1 (d, Ar), 114.0 (d, Ar), 59.2 (d,  $\text{Ar}_2\text{CH-S}$ ), 55.4 (q,  $\text{OCH}_3$ ), 54.6 (t,  $\text{CH}_3\text{NCH}_2\text{CH}_2$ ), 50.8 (br. t,  $\text{CH}_3\text{NCH}_2\text{CH}_2$ ), 45.8 (q,  $\text{NCH}_3$ ) ppm.

IR (ATR)  $\tilde{\nu}$  ( $\text{cm}^{-1}$ ): 2936, 2835, 2794, 1607, 1582, 1508, 1462, 1421, 1290, 1246, 1174, 1143, 1032, 994, 920, 833, 816, 778, 632.

### 3. Kinetics

#### Kinetics for the reactions of 1–3 with benzhydrylium ions $\text{Ar}_2\text{CH}^+$ in $\text{CH}_3\text{CN}$ at 20 °C

All rate constants were measured by using the laser-flash photolysis technique. The benzhydrylium ions ( $\text{Ar}_2\text{CH}^+$ ) were generated from suitable precursors, phosphonium salts ( $\text{Ar}_2\text{CH-PR}_3^+\text{BF}_4^-$ , P-salt, Table 1 in the main text) in  $\text{CH}_3\text{CN}$ . A solution of known concentration of P-salt in  $\text{CH}_3\text{CN}$  ( $\approx 10^{-5}$  mol  $\text{L}^{-1}$ ) was mixed with a solution of known concentration of 1–3 ( $\approx 10^{-4}$  to  $10^{-3}$  mol  $\text{L}^{-1}$ ) and 18-crown-6 (18-C-6,  $\approx 10^{-4}$  to  $10^{-3}$  mol  $\text{L}^{-1}$ ) in  $\text{CH}_3\text{CN}$ . The resulting colorless solution was then irradiated with 6.5-ns laser pulses (266 nm) to generate the benzhydrylium ions  $\text{Ar}_2\text{CH}^+$ . The decay of the absorbance of  $\text{Ar}_2\text{CH}^+$  was monitored by UV/Vis spectroscopy at the corresponding absorption maxima. The resulting pseudo-first-order rate constants  $k_{\text{obs}}$  ( $\text{s}^{-1}$ ) were obtained from at least five runs (typically 5–7 runs) at each nucleophile concentration. The absorbance-time curves were fitted to the single exponential function  $A = A_0 \exp(-k_{\text{obs}}t) + C$  to yield the rate constants  $k_{\text{obs}}$  ( $\text{s}^{-1}$ ).

#### Laser-flash photolysis techniques photolysis setup

The laser pulse (6.5 ns pulse width, 266 nm, 40-60 mJ/pulse) originates from a Nd-YAG laser (Innolas SpitLight 600) with second (532 nm) and fourth (266 nm) harmonic generators. The UV-visible detection unit comprises a Xe-light source (Osram XBO 150 W/CR OFR in a Hamamatsu E7536 housing with Hamamatsu C8849 power supplier), a shutter to prevent unnecessary exposure of the sample to the light of the Xe-lamp, a spectrograph (Acton Spectra Pro 2300i from Princeton Instruments), a photomultiplier (Hamamatsu H-7332-10 with C7169 power supply) with amplifier (Stanford Research Systems SR445A), and a pulse generator (Berkeley Nucleonics Corp. BNC 565). For the data acquisition a 350 MHz oscilloscope (Tektronix DPO 4032) was used. The sample was kept in a temperature controlled fluorescence cell, the temperature of which was maintained at 20 °C.

### Kinetics of the reaction of **1** with Ar<sub>2</sub>CH<sup>+</sup>

Rate constants for the reactions of potassium thioacetate (**1**) with (lil)<sub>2</sub>CH<sup>+</sup> in CH<sub>3</sub>CN (20 °C, laser-flash photolysis techniques, λ = 632 nm).

| [P-salt] / mol L <sup>-1</sup> | [Nu] / mol L <sup>-1</sup> | [18-C-6] / mol L <sup>-1</sup> | k <sub>obs</sub> / s <sup>-1</sup> |
|--------------------------------|----------------------------|--------------------------------|------------------------------------|
| 2.72 × 10 <sup>-5</sup>        | 2.24 × 10 <sup>-4</sup>    | 4.57 × 10 <sup>-4</sup>        | 1.91 × 10 <sup>3</sup>             |
| 2.72 × 10 <sup>-5</sup>        | 4.48 × 10 <sup>-4</sup>    | 9.14 × 10 <sup>-4</sup>        | 4.85 × 10 <sup>3</sup>             |
| 2.72 × 10 <sup>-5</sup>        | 6.72 × 10 <sup>-4</sup>    | 1.37 × 10 <sup>-3</sup>        | 7.16 × 10 <sup>3</sup>             |
| 2.72 × 10 <sup>-5</sup>        | 8.96 × 10 <sup>-4</sup>    | 1.83 × 10 <sup>-3</sup>        | 9.59 × 10 <sup>3</sup>             |
| 2.72 × 10 <sup>-5</sup>        | 1.12 × 10 <sup>-3</sup>    | 2.29 × 10 <sup>-3</sup>        | 1.11 × 10 <sup>4</sup>             |

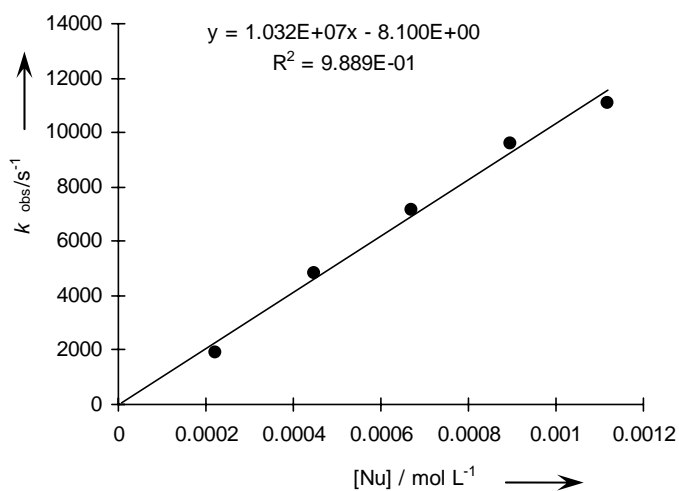

Rate constants for the reactions of potassium thioacetate (**1**) with (jul)<sub>2</sub>CH<sup>+</sup> in CH<sub>3</sub>CN (20 °C, laser-flash photolysis techniques, λ = 640 nm).

| [P-salt] / mol L <sup>-1</sup> | [Nu] / mol L <sup>-1</sup> | [18-C-6] / mol L <sup>-1</sup> | k <sub>obs</sub> / s <sup>-1</sup> |
|--------------------------------|----------------------------|--------------------------------|------------------------------------|
| 2.60 × 10 <sup>-5</sup>        | 2.24 × 10 <sup>-4</sup>    | 5.84 × 10 <sup>-4</sup>        | 6.73 × 10 <sup>3</sup>             |
| 2.60 × 10 <sup>-5</sup>        | 4.48 × 10 <sup>-4</sup>    | 1.17 × 10 <sup>-3</sup>        | 1.34 × 10 <sup>4</sup>             |
| 2.60 × 10 <sup>-5</sup>        | 6.72 × 10 <sup>-4</sup>    | 1.75 × 10 <sup>-3</sup>        | 2.01 × 10 <sup>4</sup>             |
| 2.60 × 10 <sup>-5</sup>        | 8.96 × 10 <sup>-4</sup>    | 2.34 × 10 <sup>-3</sup>        | 2.36 × 10 <sup>4</sup>             |
| 2.60 × 10 <sup>-5</sup>        | 1.12 × 10 <sup>-3</sup>    | 2.92 × 10 <sup>-3</sup>        | 2.81 × 10 <sup>4</sup>             |

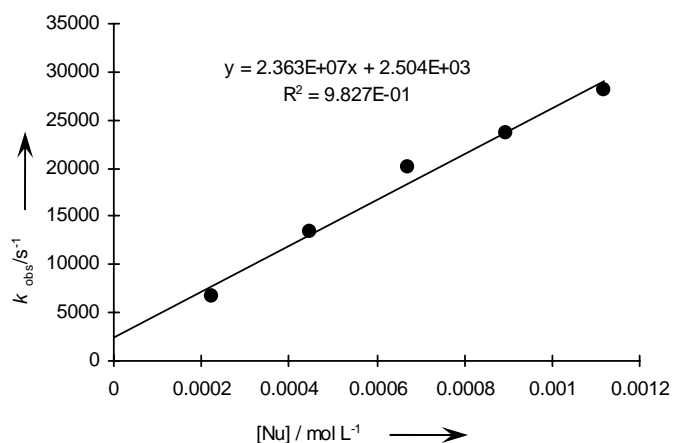

$$k = 2.36 \times 10^7 \text{ M}^{-1} \text{ s}^{-1}$$

Rate constants for the reactions of potassium thioacetate (**1**) with  $(\text{ind})_2\text{CH}^+$  in  $\text{CH}_3\text{CN}$  (20 °C, laser-flash photolysis techniques,  $\lambda = 616 \text{ nm}$ ).

| $[\text{P-salt}] / \text{mol L}^{-1}$ | $[\text{Nu}] / \text{mol L}^{-1}$ | $[\text{18-C-6}] / \text{mol L}^{-1}$ | $k_{\text{obs}} / \text{s}^{-1}$ |
|---------------------------------------|-----------------------------------|---------------------------------------|----------------------------------|
| $2.12 \times 10^{-5}$                 | $2.17 \times 10^{-4}$             | $4.45 \times 10^{-4}$                 | $1.18 \times 10^4$               |
| $2.12 \times 10^{-5}$                 | $4.34 \times 10^{-4}$             | $8.90 \times 10^{-4}$                 | $2.68 \times 10^4$               |
| $2.12 \times 10^{-5}$                 | $6.51 \times 10^{-4}$             | $1.34 \times 10^{-3}$                 | $3.99 \times 10^4$               |
| $2.12 \times 10^{-5}$                 | $8.68 \times 10^{-4}$             | $1.78 \times 10^{-3}$                 | $5.20 \times 10^4$               |
| $2.12 \times 10^{-5}$                 | $1.09 \times 10^{-3}$             | $2.23 \times 10^{-3}$                 | $6.18 \times 10^4$               |

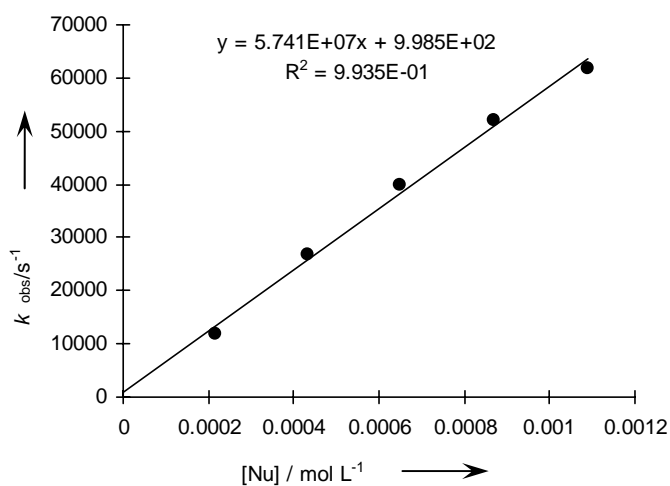

$$k = 5.74 \times 10^7 \text{ M}^{-1} \text{ s}^{-1}$$

Rate constants for the reactions of potassium thioacetate (**1**) with (pyr)<sub>2</sub>CH<sup>+</sup> in CH<sub>3</sub>CN (20 °C, laser-flash photolysis techniques, λ = 612 nm).

| [P-salt] / mol L <sup>-1</sup> | [Nu] / mol L <sup>-1</sup> | [18-C-6] / mol L <sup>-1</sup> | <i>k</i> <sub>obs</sub> / s <sup>-1</sup> |
|--------------------------------|----------------------------|--------------------------------|-------------------------------------------|
| 3.06 × 10 <sup>-5</sup>        | 1.60 × 10 <sup>-4</sup>    | 1.92 × 10 <sup>-4</sup>        | 6.54 × 10 <sup>4</sup>                    |
| 3.06 × 10 <sup>-5</sup>        | 3.20 × 10 <sup>-4</sup>    | 3.84 × 10 <sup>-4</sup>        | 1.30 × 10 <sup>5</sup>                    |
| 3.06 × 10 <sup>-5</sup>        | 4.80 × 10 <sup>-4</sup>    | 5.76 × 10 <sup>-4</sup>        | 1.84 × 10 <sup>5</sup>                    |
| 3.06 × 10 <sup>-5</sup>        | 6.40 × 10 <sup>-4</sup>    | 7.68 × 10 <sup>-4</sup>        | 2.20 × 10 <sup>5</sup>                    |
| 3.06 × 10 <sup>-5</sup>        | 8.00 × 10 <sup>-4</sup>    | 9.60 × 10 <sup>-4</sup>        | 2.69 × 10 <sup>5</sup>                    |

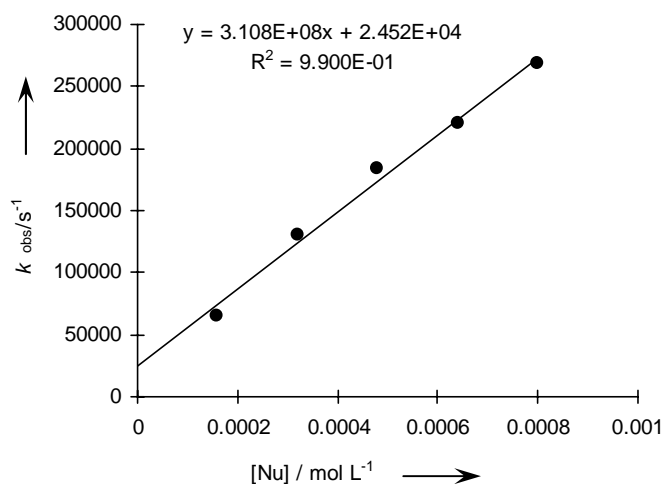

Rate constants for the reactions of potassium thioacetate (**1**) with (dma)<sub>2</sub>CH<sup>+</sup> in CH<sub>3</sub>CN (20 °C, laser-flash photolysis techniques, λ = 607 nm).

| [P-salt] / mol L <sup>-1</sup> | [Nu] / mol L <sup>-1</sup> | [18-C-6] / mol L <sup>-1</sup> | <i>k</i> <sub>obs</sub> / s <sup>-1</sup> |
|--------------------------------|----------------------------|--------------------------------|-------------------------------------------|
| 1.73 × 10 <sup>-5</sup>        | 1.68 × 10 <sup>-4</sup>    | 2.63 × 10 <sup>-4</sup>        | 1.10 × 10 <sup>5</sup>                    |
| 1.73 × 10 <sup>-5</sup>        | 3.36 × 10 <sup>-4</sup>    | 5.26 × 10 <sup>-4</sup>        | 2.40 × 10 <sup>5</sup>                    |
| 1.73 × 10 <sup>-5</sup>        | 5.04 × 10 <sup>-4</sup>    | 7.89 × 10 <sup>-4</sup>        | 3.54 × 10 <sup>5</sup>                    |
| 1.73 × 10 <sup>-5</sup>        | 6.72 × 10 <sup>-4</sup>    | 1.05 × 10 <sup>-3</sup>        | 4.54 × 10 <sup>5</sup>                    |
| 1.73 × 10 <sup>-5</sup>        | 8.41 × 10 <sup>-4</sup>    | 1.32 × 10 <sup>-3</sup>        | 5.28 × 10 <sup>5</sup>                    |

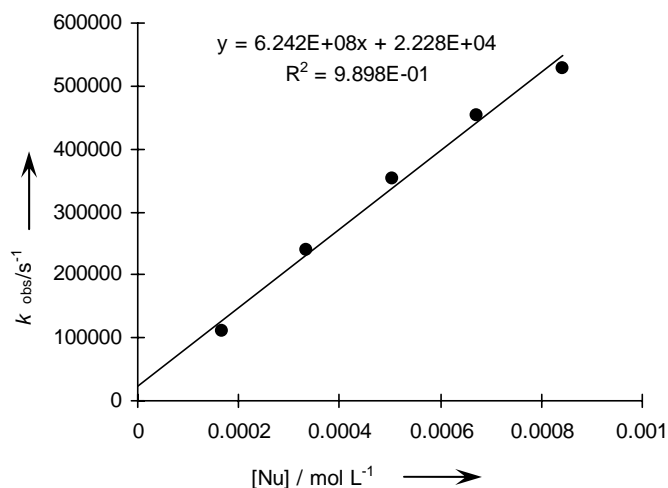

Rate constants for the reactions of potassium thioacetate (**1**) with  $(\text{mor})_2\text{CH}^+$  in  $\text{CH}_3\text{CN}$  (20 °C, laser-flash photolysis techniques,  $\lambda = 618 \text{ nm}$ ).

| [P-salt] / mol L <sup>-1</sup> | [Nu] / mol L <sup>-1</sup> | [18-C-6] / mol L <sup>-1</sup> | $k_{\text{obs}} / \text{s}^{-1}$ |
|--------------------------------|----------------------------|--------------------------------|----------------------------------|
| $1.65 \times 10^{-5}$          | $1.89 \times 10^{-4}$      | $2.84 \times 10^{-4}$          | $7.04 \times 10^5$               |
| $1.65 \times 10^{-5}$          | $3.78 \times 10^{-4}$      | $5.67 \times 10^{-4}$          | $1.36 \times 10^6$               |
| $1.65 \times 10^{-5}$          | $5.67 \times 10^{-4}$      | $8.51 \times 10^{-4}$          | $1.75 \times 10^6$               |
| $1.65 \times 10^{-5}$          | $7.56 \times 10^{-4}$      | $1.13 \times 10^{-3}$          | $2.23 \times 10^6$               |
| $1.65 \times 10^{-5}$          | $9.45 \times 10^{-4}$      | $1.42 \times 10^{-3}$          | $2.82 \times 10^6$               |

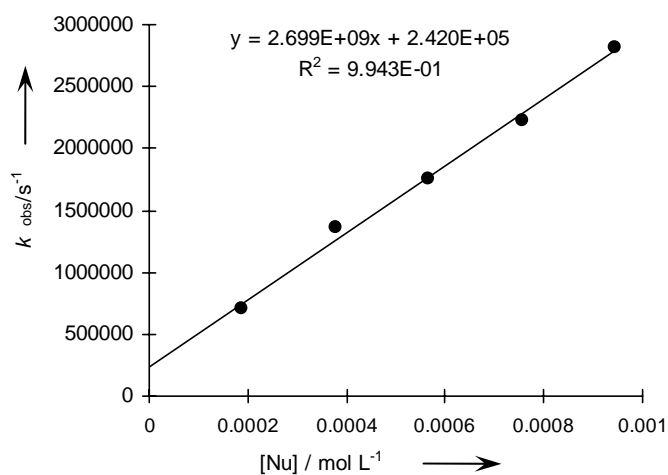

Rate constants for the reactions of potassium thioacetate (**1**) with (dpa)<sub>2</sub>CH<sup>+</sup> in CH<sub>3</sub>CN (20 °C, laser-flash photolysis techniques, λ = 644 nm).

| [P-salt] / mol L <sup>-1</sup> | [Nu] / mol L <sup>-1</sup> | [18-C-6] / mol L <sup>-1</sup> | <i>k</i> <sub>obs</sub> / s <sup>-1</sup> |
|--------------------------------|----------------------------|--------------------------------|-------------------------------------------|
| 1.83 × 10 <sup>-5</sup>        | 1.89 × 10 <sup>-4</sup>    | 3.02 × 10 <sup>-4</sup>        | 1.56 × 10 <sup>6</sup>                    |
| 1.83 × 10 <sup>-5</sup>        | 3.78 × 10 <sup>-4</sup>    | 6.05 × 10 <sup>-4</sup>        | 2.46 × 10 <sup>6</sup>                    |
| 1.83 × 10 <sup>-5</sup>        | 5.67 × 10 <sup>-4</sup>    | 9.07 × 10 <sup>-4</sup>        | 3.83 × 10 <sup>6</sup>                    |

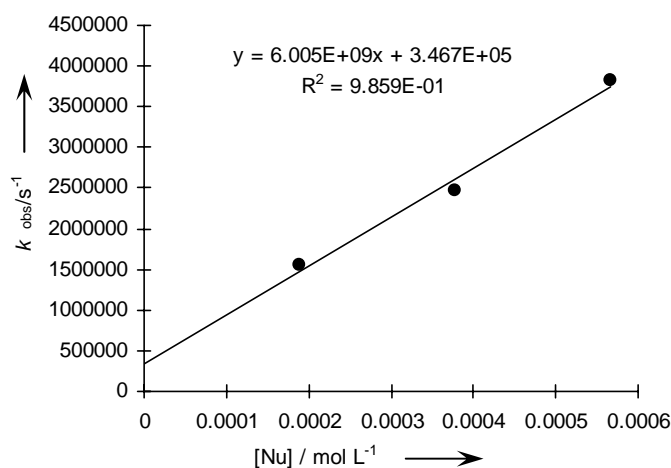

$$k = 6.01 \times 10^9 \text{ M}^{-1} \text{ s}^{-1}$$

Rate constants for the reactions of potassium thioacetate (**1**) with (mfa)<sub>2</sub>CH<sup>+</sup> in CH<sub>3</sub>CN (20 °C, laser-flash photolysis techniques, λ = 586 nm).

| [P-salt] / mol L <sup>-1</sup> | [Nu] / mol L <sup>-1</sup> | [18-C-6] / mol L <sup>-1</sup> | <i>k</i> <sub>obs</sub> / s <sup>-1</sup> |
|--------------------------------|----------------------------|--------------------------------|-------------------------------------------|
| 2.11 × 10 <sup>-5</sup>        | 1.86 × 10 <sup>-4</sup>    | 2.90 × 10 <sup>-4</sup>        | 2.09 × 10 <sup>6</sup>                    |
| 2.11 × 10 <sup>-5</sup>        | 3.72 × 10 <sup>-4</sup>    | 5.80 × 10 <sup>-4</sup>        | 3.74 × 10 <sup>6</sup>                    |
| 2.11 × 10 <sup>-5</sup>        | 5.58 × 10 <sup>-4</sup>    | 8.70 × 10 <sup>-4</sup>        | 5.46 × 10 <sup>6</sup>                    |
| 2.11 × 10 <sup>-5</sup>        | 7.44 × 10 <sup>-4</sup>    | 1.16 × 10 <sup>-3</sup>        | 8.70 × 10 <sup>6</sup>                    |
| 2.11 × 10 <sup>-5</sup>        | 9.30 × 10 <sup>-4</sup>    | 1.45 × 10 <sup>-3</sup>        | 1.15 × 10 <sup>7</sup>                    |

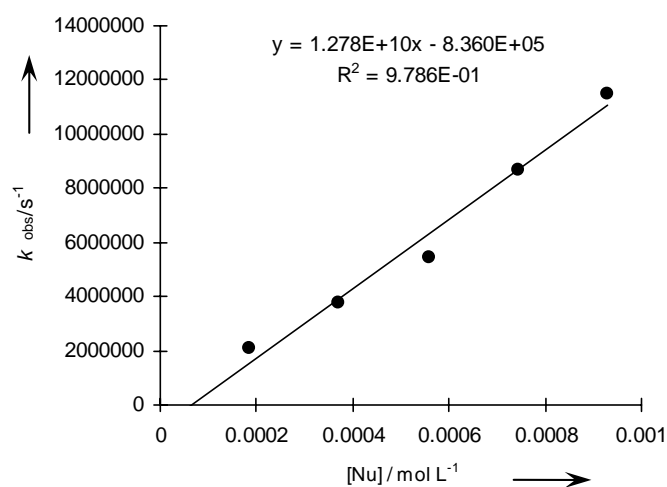

$$k = 1.28 \times 10^{10} \text{ M}^{-1} \text{ s}^{-1}$$



Rate constants for the reactions of potassium thioacetate (**1**) with (pfa)<sub>2</sub>CH<sup>+</sup> in CH<sub>3</sub>CN (20 °C, laser-flash photolysis techniques, λ = 599 nm).

| [P-salt] / mol L <sup>-1</sup> | [Nu] / mol L <sup>-1</sup> | [18-C-6] / mol L <sup>-1</sup> | <i>k</i> <sub>obs</sub> / s <sup>-1</sup> |
|--------------------------------|----------------------------|--------------------------------|-------------------------------------------|
| 1.81 × 10 <sup>-5</sup>        | 1.89 × 10 <sup>-4</sup>    | 3.02 × 10 <sup>-4</sup>        | 2.53 × 10 <sup>6</sup>                    |
| 1.81 × 10 <sup>-5</sup>        | 3.78 × 10 <sup>-4</sup>    | 6.05 × 10 <sup>-4</sup>        | 5.09 × 10 <sup>6</sup>                    |
| 1.81 × 10 <sup>-5</sup>        | 5.67 × 10 <sup>-4</sup>    | 9.07 × 10 <sup>-4</sup>        | 6.63 × 10 <sup>6</sup>                    |
| 1.81 × 10 <sup>-5</sup>        | 7.56 × 10 <sup>-4</sup>    | 1.21 × 10 <sup>-5</sup>        | 8.77 × 10 <sup>6</sup>                    |
| 1.81 × 10 <sup>-5</sup>        | 9.45 × 10 <sup>-4</sup>    | 1.51 × 10 <sup>-5</sup>        | 1.02 × 10 <sup>7</sup>                    |

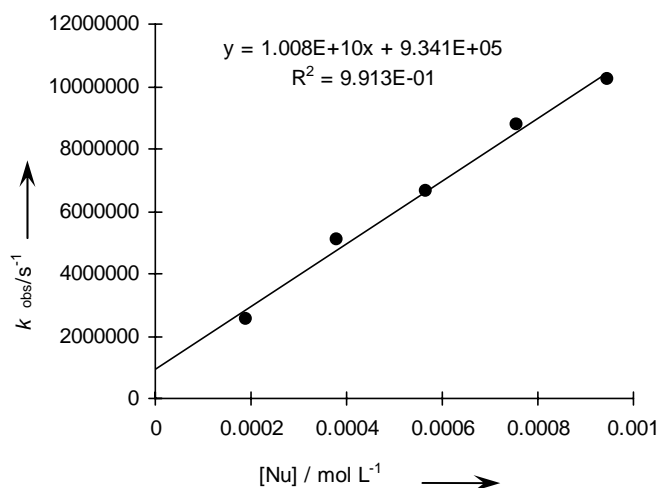

$$k = 1.01 \times 10^{10} \text{ M}^{-1} \text{ s}^{-1}$$

Rate constants for the reactions of potassium thioacetate (**1**) with (fur)<sub>2</sub>CH<sup>+</sup> in CH<sub>3</sub>CN (20 °C, laser-flash photolysis techniques, λ = 523 nm).

| [P-salt] / mol L <sup>-1</sup> | [Nu] / mol L <sup>-1</sup> | [18-C-6] / mol L <sup>-1</sup> | <i>k</i> <sub>obs</sub> / s <sup>-1</sup> |
|--------------------------------|----------------------------|--------------------------------|-------------------------------------------|
| 3.80 × 10 <sup>-5</sup>        | 3.71 × 10 <sup>-4</sup>    | 5.57 × 10 <sup>-4</sup>        | 8.88 × 10 <sup>6</sup>                    |
| 3.80 × 10 <sup>-5</sup>        | 7.42 × 10 <sup>-4</sup>    | 1.11 × 10 <sup>-5</sup>        | 1.80 × 10 <sup>7</sup>                    |
| 3.80 × 10 <sup>-5</sup>        | 1.11 × 10 <sup>-3</sup>    | 1.67 × 10 <sup>-5</sup>        | 2.69 × 10 <sup>7</sup>                    |

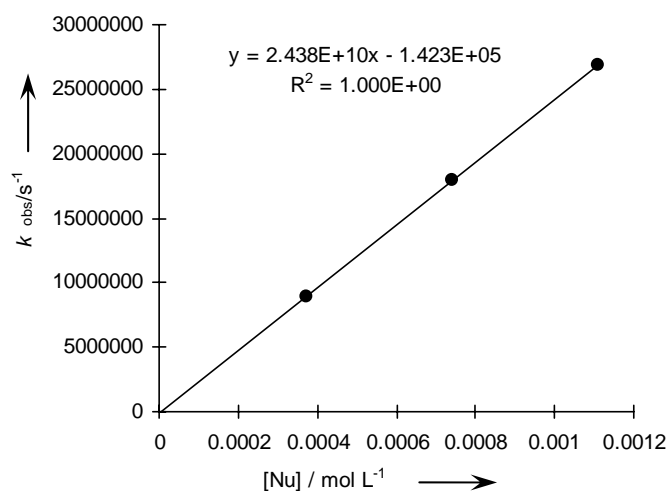

$$k = 2.44 \times 10^{10} \text{ M}^{-1} \text{ s}^{-1}$$

Rate constants for the reactions of potassium thioacetate (**1**) with (ani)<sub>2</sub>CH<sup>+</sup> in CH<sub>3</sub>CN (20 °C, laser-flash photolysis techniques, λ = 500 nm).

| [P-salt] / mol L <sup>-1</sup> | [Nu] / mol L <sup>-1</sup> | [18-C-6] / mol L <sup>-1</sup> | k <sub>obs</sub> / s <sup>-1</sup> |
|--------------------------------|----------------------------|--------------------------------|------------------------------------|
| 2.50 × 10 <sup>-5</sup>        | 2.10 × 10 <sup>-4</sup>    | 4.75 × 10 <sup>-4</sup>        | 7.03 × 10 <sup>6</sup>             |
| 2.50 × 10 <sup>-5</sup>        | 4.20 × 10 <sup>-4</sup>    | 9.50 × 10 <sup>-4</sup>        | 1.33 × 10 <sup>7</sup>             |
| 2.50 × 10 <sup>-5</sup>        | 6.30 × 10 <sup>-4</sup>    | 1.43 × 10 <sup>-3</sup>        | 2.00 × 10 <sup>7</sup>             |

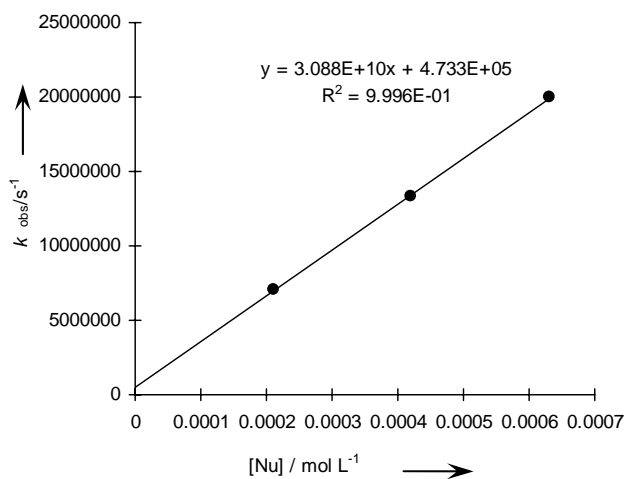

$$k = 3.10 \times 10^{10} \text{ M}^{-1} \text{ s}^{-1}$$

Determination of the parameters  $N$  and  $s_N$  for **1**

| Electrophiles                      | $E$    | $k$ (M <sup>-1</sup> s <sup>-1</sup> ) |
|------------------------------------|--------|----------------------------------------|
| (lil) <sub>2</sub> CH <sup>+</sup> | -10.04 | $1.03 \times 10^7$                     |
| (jul) <sub>2</sub> CH <sup>+</sup> | -9.45  | $2.36 \times 10^7$                     |
| (ind) <sub>2</sub> CH <sup>+</sup> | -8.76  | $5.74 \times 10^7$                     |
| (pyr) <sub>2</sub> CH <sup>+</sup> | -7.69  | $3.11 \times 10^8$                     |
| (dma) <sub>2</sub> CH <sup>+</sup> | -7.02  | $6.24 \times 10^8$ <sup>a</sup>        |
| (mor) <sub>2</sub> CH <sup>+</sup> | -5.89  | $2.70 \times 10^9$ <sup>a</sup>        |
| (dpa) <sub>2</sub> CH <sup>+</sup> | -4.72  | $6.01 \times 10^9$ <sup>a</sup>        |
| (mfa) <sub>2</sub> CH <sup>+</sup> | -3.85  | $1.28 \times 10^{10}$ <sup>a</sup>     |
| (pfa) <sub>2</sub> CH <sup>+</sup> | -3.14  | $1.01 \times 10^{10}$ <sup>a</sup>     |
| (fur) <sub>2</sub> CH <sup>+</sup> | -1.36  | $2.44 \times 10^{10}$ <sup>a</sup>     |
| (ani) <sub>2</sub> CH <sup>+</sup> | 0      | $3.10 \times 10^{10}$ <sup>a</sup>     |

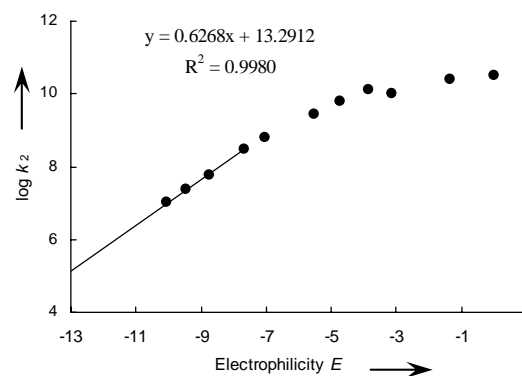

$$N = 21.21$$

$$s_N = 0.63$$

<sup>a</sup> Because of the proximity of the diffusion limit, not used for the calculation of  $N$  and  $s_N$ .

### Kinetics of the reaction of the thioester salts **2a** with $\text{Ar}_2\text{CH}^+$ .

Rate constants for the reactions of potassium *O*-ethyl dithiocarbonate (**2a**) with  $(\text{liI})_2\text{CH}^+$  in  $\text{CH}_3\text{CN}$  (20 °C, laser-flash photolysis techniques,  $\lambda = 632 \text{ nm}$ ).

| [P-salt] / mol L <sup>-1</sup> | [Nu] / mol L <sup>-1</sup> | [18-C-6] / mol L <sup>-1</sup> | $k_{\text{obs}} / \text{s}^{-1}$ |
|--------------------------------|----------------------------|--------------------------------|----------------------------------|
| $6.40 \times 10^{-5}$          | $1.61 \times 10^{-3}$      | $1.74 \times 10^{-3}$          | $4.08 \times 10^3$               |
| $6.40 \times 10^{-5}$          | $2.42 \times 10^{-3}$      | $3.63 \times 10^{-3}$          | $6.06 \times 10^3$               |
| $6.40 \times 10^{-5}$          | $3.22 \times 10^{-3}$      | $4.83 \times 10^{-3}$          | $7.96 \times 10^3$               |
| $6.40 \times 10^{-5}$          | $4.03 \times 10^{-3}$      | $6.05 \times 10^{-3}$          | $9.66 \times 10^3$               |
| $6.40 \times 10^{-5}$          | $4.83 \times 10^{-3}$      | $7.25 \times 10^{-3}$          | $1.14 \times 10^4$               |

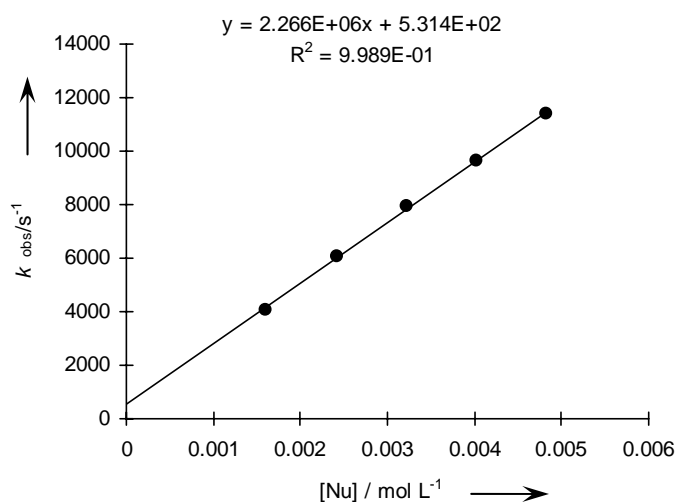

$$k = 2.27 \times 10^6 \text{ M}^{-1} \text{ s}^{-1}$$

Rate constants for the reactions of potassium *O*-ethyl dithiocarbonate (**2a**) with  $(\text{jul})_2\text{CH}^+$  in  $\text{CH}_3\text{CN}$  (20 °C, laser-flash photolysis techniques,  $\lambda = 640 \text{ nm}$ ).

| [P-salt] / mol L <sup>-1</sup> | [Nu] / mol L <sup>-1</sup> | [18-C-6] / mol L <sup>-1</sup> | $k_{\text{obs}} / \text{s}^{-1}$ |
|--------------------------------|----------------------------|--------------------------------|----------------------------------|
| $2.60 \times 10^{-5}$          | $2.20 \times 10^{-4}$      | $6.48 \times 10^{-4}$          | $1.88 \times 10^3$               |
| $2.60 \times 10^{-5}$          | $4.40 \times 10^{-4}$      | $1.30 \times 10^{-3}$          | $3.77 \times 10^3$               |
| $2.60 \times 10^{-5}$          | $6.60 \times 10^{-4}$      | $1.94 \times 10^{-3}$          | $5.66 \times 10^3$               |
| $2.60 \times 10^{-5}$          | $8.80 \times 10^{-4}$      | $2.59 \times 10^{-3}$          | $7.47 \times 10^3$               |
| $2.60 \times 10^{-5}$          | $1.10 \times 10^{-3}$      | $3.24 \times 10^{-3}$          | $9.58 \times 10^3$               |

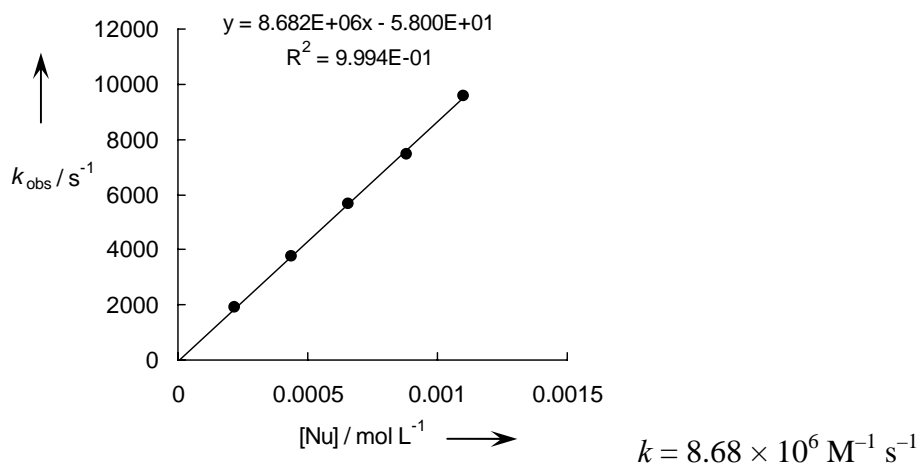

Rate constants for the reactions of potassium *O*-ethyl dithiocarbonate (**2a**) with (ind)<sub>2</sub>CH<sup>+</sup> in CH<sub>3</sub>CN (20 °C, laser-flash photolysis techniques, λ = 616 nm).

| [P-salt] / mol L <sup>-1</sup> | [Nu] / mol L <sup>-1</sup> | [18-C-6] / mol L <sup>-1</sup> | <i>k</i> <sub>obs</sub> / s <sup>-1</sup> |
|--------------------------------|----------------------------|--------------------------------|-------------------------------------------|
| 3.18 × 10 <sup>-5</sup>        | 1.29 × 10 <sup>-3</sup>    | 1.68 × 10 <sup>-3</sup>        | 2.30 × 10 <sup>4</sup>                    |
| 3.18 × 10 <sup>-5</sup>        | 1.61 × 10 <sup>-3</sup>    | 2.09 × 10 <sup>-3</sup>        | 2.84 × 10 <sup>4</sup>                    |
| 3.18 × 10 <sup>-5</sup>        | 1.93 × 10 <sup>-3</sup>    | 2.51 × 10 <sup>-3</sup>        | 3.28 × 10 <sup>4</sup>                    |
| 3.18 × 10 <sup>-5</sup>        | 2.42 × 10 <sup>-3</sup>    | 3.15 × 10 <sup>-3</sup>        | 4.03 × 10 <sup>4</sup>                    |
| 3.18 × 10 <sup>-5</sup>        | 2.90 × 10 <sup>-3</sup>    | 3.77 × 10 <sup>-3</sup>        | 4.67 × 10 <sup>4</sup>                    |

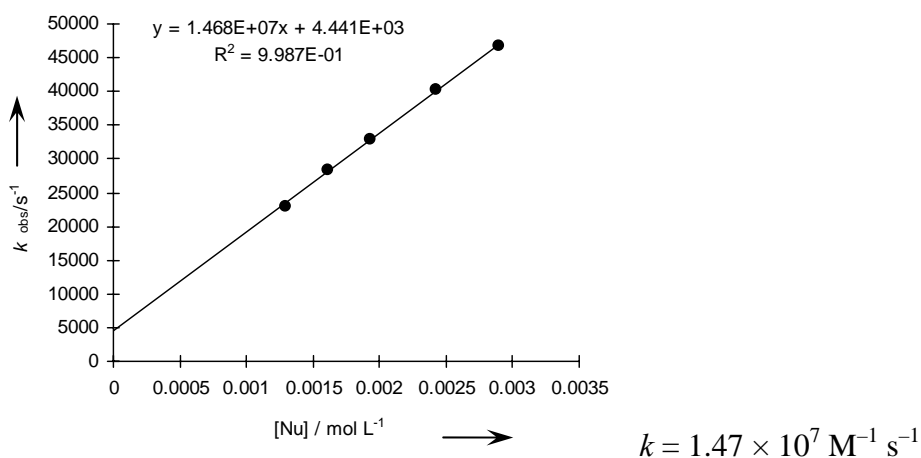

Rate constants for the reactions of potassium *O*-ethyl dithiocarbonate (**2a**) with (pyr)<sub>2</sub>CH<sup>+</sup> in CH<sub>3</sub>CN (20 °C, laser-flash photolysis techniques, λ = 612 nm).

| [P-salt] / mol L <sup>-1</sup> | [Nu] / mol L <sup>-1</sup> | [18-C-6] / mol L <sup>-1</sup> | <i>k</i> <sub>obs</sub> / s <sup>-1</sup> |
|--------------------------------|----------------------------|--------------------------------|-------------------------------------------|
| 2.15 × 10 <sup>-5</sup>        | 2.19 × 10 <sup>-4</sup>    | 3.50 × 10 <sup>-4</sup>        | 2.99 × 10 <sup>4</sup>                    |
| 2.15 × 10 <sup>-5</sup>        | 4.38 × 10 <sup>-4</sup>    | 7.00 × 10 <sup>-4</sup>        | 5.93 × 10 <sup>4</sup>                    |
| 2.15 × 10 <sup>-5</sup>        | 6.58 × 10 <sup>-4</sup>    | 1.05 × 10 <sup>-3</sup>        | 9.07 × 10 <sup>4</sup>                    |
| 2.15 × 10 <sup>-5</sup>        | 8.77 × 10 <sup>-4</sup>    | 1.40 × 10 <sup>-3</sup>        | 1.15 × 10 <sup>5</sup>                    |
| 2.15 × 10 <sup>-5</sup>        | 1.09 × 10 <sup>-3</sup>    | 1.75 × 10 <sup>-3</sup>        | 1.41 × 10 <sup>5</sup>                    |

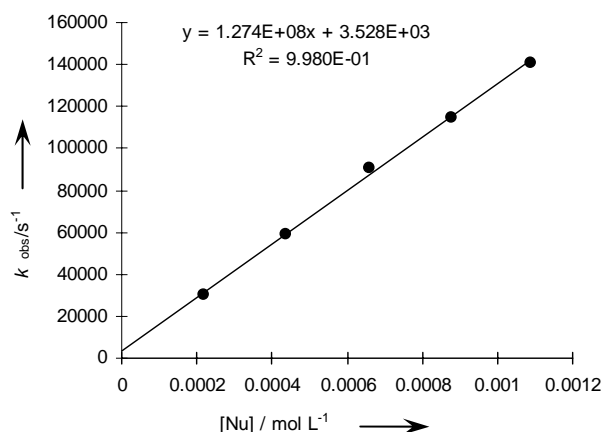

$$k = 1.27 \times 10^8 \text{ M}^{-1} \text{ s}^{-1}$$

Rate constants for the reactions of potassium *O*-ethyl dithiocarbonate (**2a**) with  $(\text{dma})_2\text{CH}^+$  in  $\text{CH}_3\text{CN}$  (20 °C, laser-flash photolysis techniques,  $\lambda = 607 \text{ nm}$ ).

| [P-salt] / mol L <sup>-1</sup> | [Nu] / mol L <sup>-1</sup> | [18-C-6] / mol L <sup>-1</sup> | $k_{\text{obs}} / \text{s}^{-1}$ |
|--------------------------------|----------------------------|--------------------------------|----------------------------------|
| $1.73 \times 10^{-5}$          | $3.50 \times 10^{-4}$      | $3.72 \times 10^{-4}$          | $1.20 \times 10^5$               |
| $1.73 \times 10^{-5}$          | $5.25 \times 10^{-4}$      | $7.45 \times 10^{-4}$          | $1.73 \times 10^5$               |
| $1.73 \times 10^{-5}$          | $7.00 \times 10^{-4}$      | $1.12 \times 10^{-3}$          | $2.29 \times 10^5$               |
| $1.73 \times 10^{-5}$          | $8.75 \times 10^{-4}$      | $1.49 \times 10^{-3}$          | $2.70 \times 10^5$               |

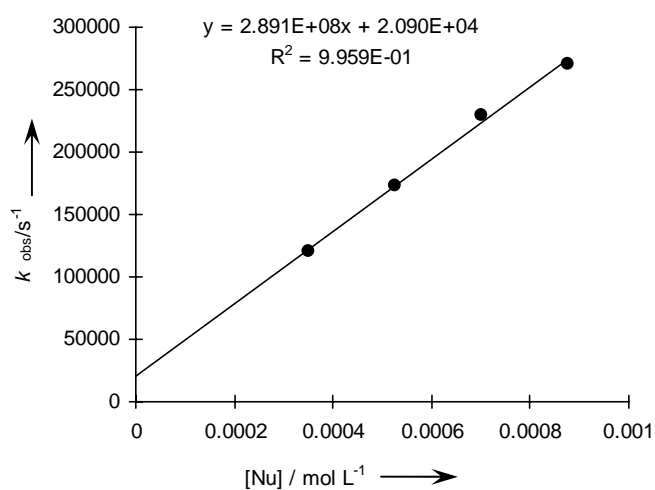

$$k = 2.89 \times 10^8 \text{ M}^{-1} \text{ s}^{-1}$$

Rate constants for the reactions of potassium *O*-ethyl dithiocarbonate (**2a**) with  $(\text{mor})_2\text{CH}^+$  in  $\text{CH}_3\text{CN}$  (20 °C, laser-flash photolysis techniques,  $\lambda = 618 \text{ nm}$ ).

| [P-salt] / mol L <sup>-1</sup> | [Nu] / mol L <sup>-1</sup> | [18-C-6] / mol L <sup>-1</sup> | $k_{\text{obs}} / \text{s}^{-1}$ |
|--------------------------------|----------------------------|--------------------------------|----------------------------------|
| $1.65 \times 10^{-5}$          | $1.67 \times 10^{-4}$      | $2.84 \times 10^{-4}$          | $3.71 \times 10^5$               |
| $1.65 \times 10^{-5}$          | $3.34 \times 10^{-4}$      | $5.68 \times 10^{-4}$          | $7.34 \times 10^5$               |
| $1.65 \times 10^{-5}$          | $5.02 \times 10^{-4}$      | $8.52 \times 10^{-4}$          | $1.06 \times 10^6$               |
| $1.65 \times 10^{-5}$          | $6.90 \times 10^{-4}$      | $1.14 \times 10^{-3}$          | $1.37 \times 10^6$               |
| $1.65 \times 10^{-5}$          | $8.36 \times 10^{-4}$      | $1.42 \times 10^{-3}$          | $1.70 \times 10^6$               |

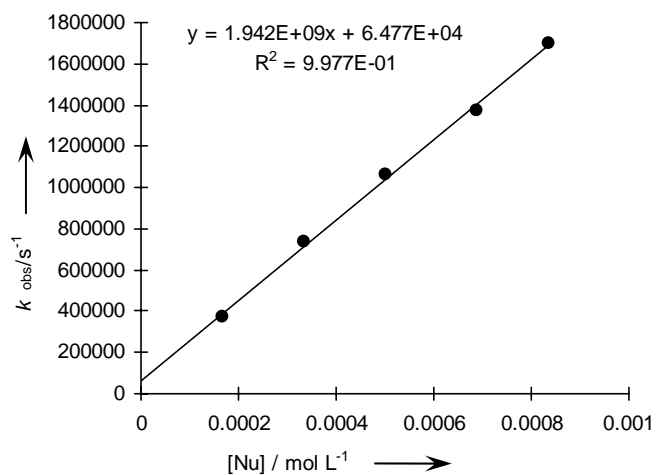

$$k = 1.94 \times 10^9 \text{ M}^{-1} \text{ s}^{-1}$$

Rate constants for the reactions of potassium *O*-ethyl dithiocarbonate (**2a**) with  $(\text{dpa})_2\text{CH}^+$  in  $\text{CH}_3\text{CN}$  (20 °C, laser-flash photolysis techniques,  $\lambda = 644 \text{ nm}$ ).

| [P-salt] / mol L <sup>-1</sup> | [Nu] / mol L <sup>-1</sup> | [18-C-6] / mol L <sup>-1</sup> | $k_{\text{obs}} / \text{s}^{-1}$ |
|--------------------------------|----------------------------|--------------------------------|----------------------------------|
| $1.83 \times 10^{-5}$          | $1.67 \times 10^{-4}$      | $2.84 \times 10^{-4}$          | $1.48 \times 10^6$               |
| $1.83 \times 10^{-5}$          | $3.33 \times 10^{-4}$      | $5.68 \times 10^{-4}$          | $2.90 \times 10^6$               |
| $1.83 \times 10^{-5}$          | $5.01 \times 10^{-4}$      | $8.52 \times 10^{-4}$          | $4.19 \times 10^6$               |
| $1.83 \times 10^{-5}$          | $6.68 \times 10^{-4}$      | $1.14 \times 10^{-3}$          | $5.21 \times 10^6$               |
| $1.83 \times 10^{-5}$          | $8.35 \times 10^{-4}$      | $1.42 \times 10^{-3}$          | $6.77 \times 10^6$               |

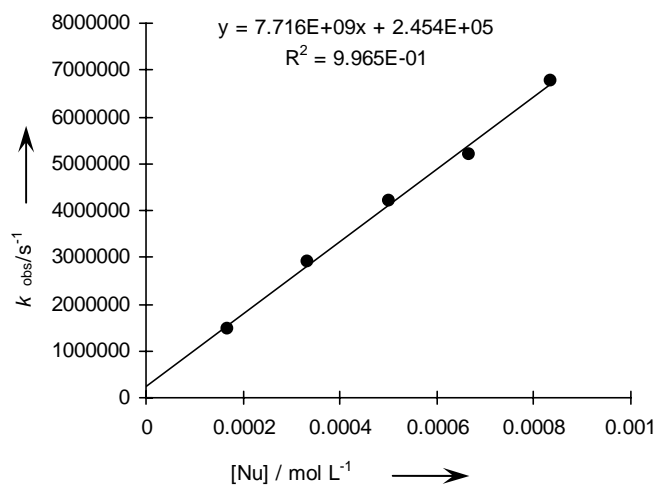

$$k = 7.72 \times 10^9 \text{ M}^{-1} \text{ s}^{-1}$$

Rate constants for the reactions of potassium *O*-ethyl dithiocarbonate (**2a**) with (mfa)<sub>2</sub>CH<sup>+</sup> in CH<sub>3</sub>CN (20 °C, laser-flash photolysis techniques, λ = 586 nm).

| [P-salt] / mol L <sup>-1</sup> | [Nu] / mol L <sup>-1</sup> | [18-C-6] / mol L <sup>-1</sup> | <i>k</i> <sub>obs</sub> / s <sup>-1</sup> |
|--------------------------------|----------------------------|--------------------------------|-------------------------------------------|
| 1.46 × 10 <sup>-5</sup>        | 1.75 × 10 <sup>-4</sup>    | 2.80 × 10 <sup>-4</sup>        | 1.41 × 10 <sup>6</sup>                    |
| 1.46 × 10 <sup>-5</sup>        | 3.50 × 10 <sup>-4</sup>    | 5.60 × 10 <sup>-4</sup>        | 2.55 × 10 <sup>6</sup>                    |
| 1.46 × 10 <sup>-5</sup>        | 5.25 × 10 <sup>-4</sup>    | 8.40 × 10 <sup>-4</sup>        | 4.22 × 10 <sup>6</sup>                    |
| 1.46 × 10 <sup>-5</sup>        | 7.00 × 10 <sup>-4</sup>    | 1.12 × 10 <sup>-3</sup>        | 5.02 × 10 <sup>6</sup>                    |
| 1.46 × 10 <sup>-5</sup>        | 8.75 × 10 <sup>-4</sup>    | 1.40 × 10 <sup>-3</sup>        | 6.37 × 10 <sup>6</sup>                    |

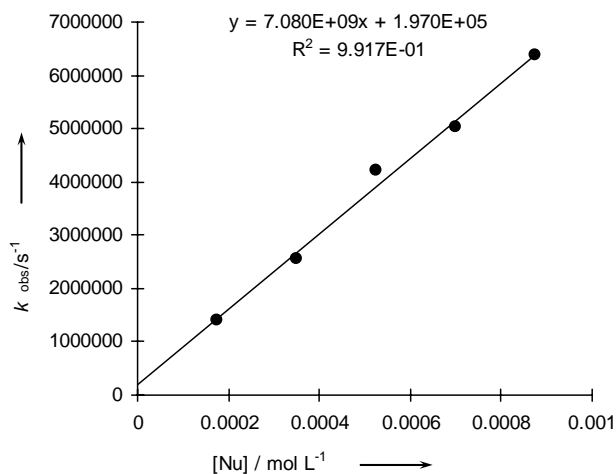

$$k = 7.08 \times 10^9 \text{ M}^{-1} \text{ s}^{-1}$$

Rate constants for the reactions of potassium *O*-ethyl dithiocarbonate (**2a**) with (pfa)<sub>2</sub>CH<sup>+</sup> in CH<sub>3</sub>CN (20 °C, laser-flash photolysis techniques, λ = 599 nm).

| [P-salt] / mol L <sup>-1</sup> | [Nu] / mol L <sup>-1</sup> | [18-C-6] / mol L <sup>-1</sup> | <i>k</i> <sub>obs</sub> / s <sup>-1</sup> |
|--------------------------------|----------------------------|--------------------------------|-------------------------------------------|
| 1.81 × 10 <sup>-5</sup>        | 1.67 × 10 <sup>-4</sup>    | 2.51 × 10 <sup>-4</sup>        | 2.27 × 10 <sup>6</sup>                    |
| 1.81 × 10 <sup>-5</sup>        | 3.34 × 10 <sup>-4</sup>    | 5.01 × 10 <sup>-4</sup>        | 4.47 × 10 <sup>6</sup>                    |
| 1.81 × 10 <sup>-5</sup>        | 5.01 × 10 <sup>-4</sup>    | 7.52 × 10 <sup>-4</sup>        | 6.49 × 10 <sup>6</sup>                    |
| 1.81 × 10 <sup>-5</sup>        | 6.68 × 10 <sup>-4</sup>    | 1.00 × 10 <sup>-4</sup>        | 8.35 × 10 <sup>6</sup>                    |
| 1.81 × 10 <sup>-5</sup>        | 8.35 × 10 <sup>-4</sup>    | 1.25 × 10 <sup>-4</sup>        | 1.05 × 10 <sup>7</sup>                    |

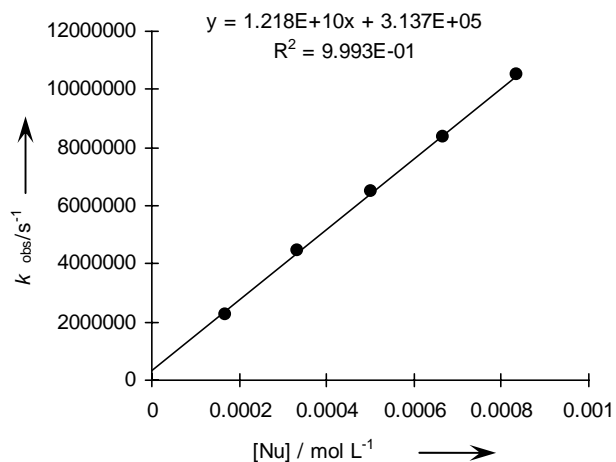

$$k = 1.22 \times 10^{10} \text{ M}^{-1} \text{ s}^{-1}$$

Rate constants for the reactions of potassium *O*-ethyl dithiocarbonate (**2a**) with (ani)<sub>2</sub>CH<sup>+</sup> in CH<sub>3</sub>CN (20 °C, laser-flash photolysis techniques, λ = 500 nm).

| [P-salt] / mol L <sup>-1</sup> | [Nu] / mol L <sup>-1</sup> | [18-C-6] / mol L <sup>-1</sup> | k <sub>obs</sub> / s <sup>-1</sup> |
|--------------------------------|----------------------------|--------------------------------|------------------------------------|
| 2.50 × 10 <sup>-5</sup>        | 2.00 × 10 <sup>-4</sup>    | 4.78 × 10 <sup>-4</sup>        | 5.72 × 10 <sup>6</sup>             |
| 2.50 × 10 <sup>-5</sup>        | 4.00 × 10 <sup>-4</sup>    | 9.56 × 10 <sup>-4</sup>        | 1.09 × 10 <sup>7</sup>             |
| 2.50 × 10 <sup>-5</sup>        | 6.00 × 10 <sup>-4</sup>    | 1.43 × 10 <sup>-3</sup>        | 1.53 × 10 <sup>7</sup>             |
| 2.50 × 10 <sup>-5</sup>        | 8.00 × 10 <sup>-4</sup>    | 1.91 × 10 <sup>-3</sup>        | 2.13 × 10 <sup>7</sup>             |
| 2.50 × 10 <sup>-5</sup>        | 1.00 × 10 <sup>-3</sup>    | 2.39 × 10 <sup>-3</sup>        | 2.60 × 10 <sup>7</sup>             |

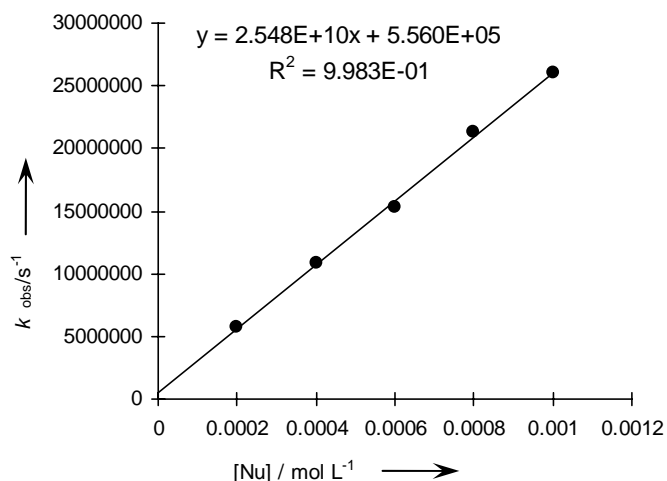

$$k = 2.55 \times 10^{10} \text{ M}^{-1} \text{ s}^{-1}$$

Determination of the parameters  $N$  and  $s_N$  for **2a**

| Electrophiles                      | $E$    | $k$ (M <sup>-1</sup> s <sup>-1</sup> ) |
|------------------------------------|--------|----------------------------------------|
| (lil) <sub>2</sub> CH <sup>+</sup> | -10.04 | 2.27 × 10 <sup>6</sup>                 |
| (jul) <sub>2</sub> CH <sup>+</sup> | -9.45  | 8.68 × 10 <sup>6</sup>                 |
| (ind) <sub>2</sub> CH <sup>+</sup> | -8.76  | 1.47 × 10 <sup>7</sup>                 |
| (pyr) <sub>2</sub> CH <sup>+</sup> | -7.69  | 1.27 × 10 <sup>8</sup>                 |
| (dma) <sub>2</sub> CH <sup>+</sup> | -7.02  | 2.89 × 10 <sup>8</sup>                 |
| (mor) <sub>2</sub> CH <sup>+</sup> | -5.89  | 1.94 × 10 <sup>9 a</sup>               |
| (dpa) <sub>2</sub> CH <sup>+</sup> | -4.72  | 7.72 × 10 <sup>9 a</sup>               |
| (mfa) <sub>2</sub> CH <sup>+</sup> | -3.85  | 7.08 × 10 <sup>9 a</sup>               |
| (pfa) <sub>2</sub> CH <sup>+</sup> | -3.14  | 1.22 × 10 <sup>10 a</sup>              |
| (ani) <sub>2</sub> CH <sup>+</sup> | 0      | 2.55 × 10 <sup>10 a</sup>              |

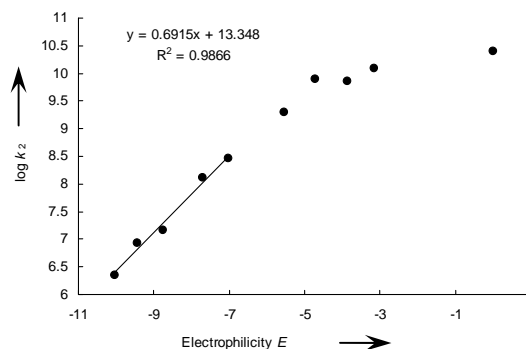

$$N = 19.30$$

$$s_N = 0.69$$

<sup>a</sup> Because of the proximity of the diffusion limit, not used for the calculation of  $N$  and  $s_N$ .



### Kinetics of the reaction of **2b** with $\text{Ar}_2\text{CH}^+$ .

Rate constants for the reactions of potassium *O*-isopropyl dithiocarbonate (**2b**) with  $(\text{liI})_2\text{CH}^+$  in  $\text{CH}_3\text{CN}$  (20 °C, laser-flash photolysis techniques,  $\lambda = 632 \text{ nm}$ ).

| [P-salt] / mol L <sup>-1</sup> | [Nu] / mol L <sup>-1</sup> | [18-C-6] / mol L <sup>-1</sup> | $k_{\text{obs}} / \text{s}^{-1}$ |
|--------------------------------|----------------------------|--------------------------------|----------------------------------|
| $2.91 \times 10^{-5}$          | $1.96 \times 10^{-4}$      | $3.14 \times 10^{-4}$          | $5.04 \times 10^2$               |
| $2.91 \times 10^{-5}$          | $3.92 \times 10^{-4}$      | $6.27 \times 10^{-4}$          | $1.07 \times 10^3$               |
| $2.91 \times 10^{-5}$          | $5.88 \times 10^{-4}$      | $9.41 \times 10^{-4}$          | $1.65 \times 10^3$               |
| $2.91 \times 10^{-5}$          | $7.84 \times 10^{-4}$      | $1.25 \times 10^{-3}$          | $2.15 \times 10^3$               |
| $2.91 \times 10^{-5}$          | $9.80 \times 10^{-4}$      | $1.57 \times 10^{-3}$          | $2.68 \times 10^3$               |

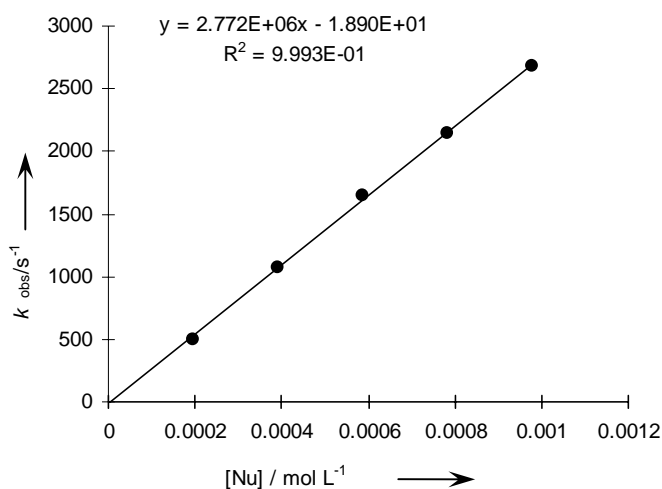

$$k = 2.77 \times 10^6 \text{ M}^{-1} \text{ s}^{-1}$$

Rate constants for the reactions of potassium *O*-isopropyl dithiocarbonate (**2b**) with  $(\text{jul})_2\text{CH}^+$  in  $\text{CH}_3\text{CN}$  (20 °C, laser-flash photolysis techniques,  $\lambda = 640 \text{ nm}$ ).

| [P-salt] / mol L <sup>-1</sup> | [Nu] / mol L <sup>-1</sup> | [18-C-6] / mol L <sup>-1</sup> | $k_{\text{obs}} / \text{s}^{-1}$ |
|--------------------------------|----------------------------|--------------------------------|----------------------------------|
| $3.34 \times 10^{-5}$          | $1.12 \times 10^{-3}$      | $1.68 \times 10^{-4}$          | $1.16 \times 10^4$               |
| $3.34 \times 10^{-5}$          | $1.34 \times 10^{-3}$      | $2.01 \times 10^{-4}$          | $1.40 \times 10^4$               |
| $3.34 \times 10^{-5}$          | $1.68 \times 10^{-3}$      | $2.52 \times 10^{-4}$          | $1.68 \times 10^4$               |
| $3.34 \times 10^{-5}$          | $2.02 \times 10^{-3}$      | $3.03 \times 10^{-4}$          | $1.92 \times 10^4$               |
| $3.34 \times 10^{-5}$          | $2.24 \times 10^{-3}$      | $3.36 \times 10^{-4}$          | $2.02 \times 10^4$               |

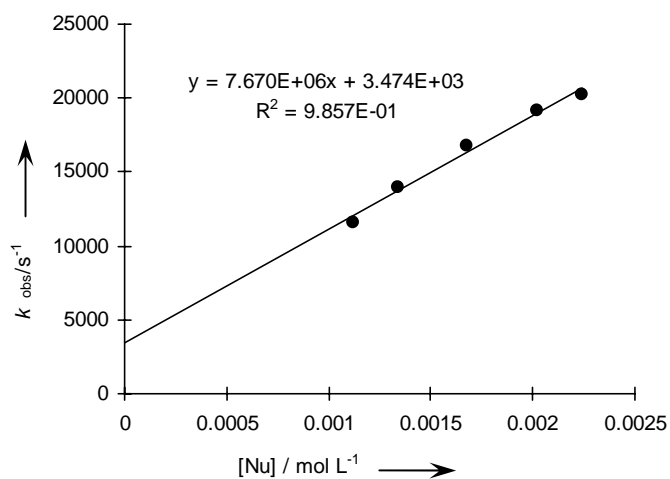

Rate constants for the reactions of potassium *O*-isopropyl dithiocarbonate (**2b**) with (ind)<sub>2</sub>CH<sup>+</sup> in CH<sub>3</sub>CN (20 °C, laser-flash photolysis techniques, λ = 616 nm).

| [P-salt] / mol L <sup>-1</sup> | [Nu] / mol L <sup>-1</sup> | [18-C-6] / mol L <sup>-1</sup> | <i>k</i> <sub>obs</sub> / s <sup>-1</sup> |
|--------------------------------|----------------------------|--------------------------------|-------------------------------------------|
| 2.33 × 10 <sup>-5</sup>        | 1.31 × 10 <sup>-4</sup>    | 2.17 × 10 <sup>-4</sup>        | 3.21 × 10 <sup>3</sup>                    |
| 2.33 × 10 <sup>-5</sup>        | 2.62 × 10 <sup>-4</sup>    | 4.35 × 10 <sup>-4</sup>        | 6.51 × 10 <sup>3</sup>                    |
| 2.33 × 10 <sup>-5</sup>        | 3.93 × 10 <sup>-4</sup>    | 6.52 × 10 <sup>-4</sup>        | 9.92 × 10 <sup>3</sup>                    |
| 2.33 × 10 <sup>-5</sup>        | 5.24 × 10 <sup>-4</sup>    | 8.70 × 10 <sup>-4</sup>        | 1.34 × 10 <sup>4</sup>                    |
| 2.33 × 10 <sup>-5</sup>        | 6.55 × 10 <sup>-4</sup>    | 1.09 × 10 <sup>-3</sup>        | 1.64 × 10 <sup>4</sup>                    |

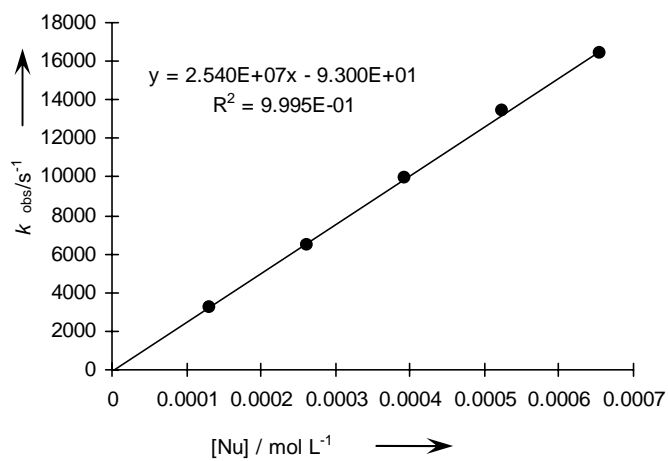

Rate constants for the reactions of potassium *O*-isopropyl dithiocarbonate (**2b**) with (pyr)<sub>2</sub>CH<sup>+</sup> in CH<sub>3</sub>CN (20 °C, laser-flash photolysis techniques, λ = 612 nm).

| [P-salt] / mol L <sup>-1</sup> | [Nu] / mol L <sup>-1</sup> | [18-C-6] / mol L <sup>-1</sup> | <i>k</i> <sub>obs</sub> / s <sup>-1</sup> |
|--------------------------------|----------------------------|--------------------------------|-------------------------------------------|
| 2.58 × 10 <sup>-5</sup>        | 1.31 × 10 <sup>-4</sup>    | 2.33 × 10 <sup>-4</sup>        | 2.21 × 10 <sup>4</sup>                    |
| 2.58 × 10 <sup>-5</sup>        | 2.62 × 10 <sup>-4</sup>    | 4.66 × 10 <sup>-4</sup>        | 4.66 × 10 <sup>4</sup>                    |
| 2.58 × 10 <sup>-5</sup>        | 3.93 × 10 <sup>-4</sup>    | 7.00 × 10 <sup>-4</sup>        | 7.19 × 10 <sup>4</sup>                    |
| 2.58 × 10 <sup>-5</sup>        | 5.24 × 10 <sup>-4</sup>    | 9.33 × 10 <sup>-4</sup>        | 9.82 × 10 <sup>4</sup>                    |
| 2.58 × 10 <sup>-5</sup>        | 6.55 × 10 <sup>-4</sup>    | 1.17 × 10 <sup>-3</sup>        | 1.21 × 10 <sup>5</sup>                    |

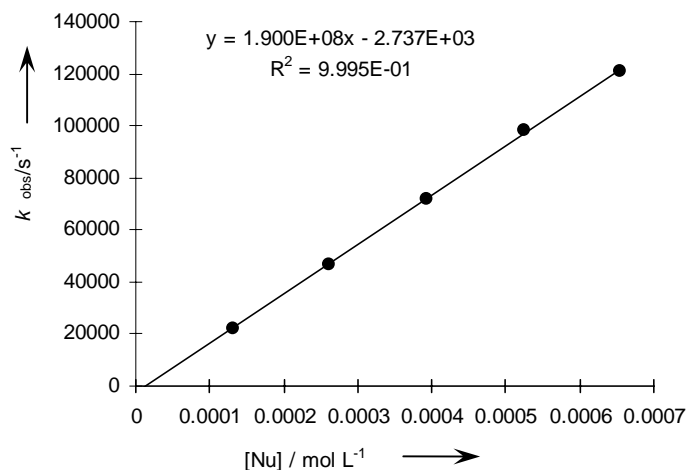

$$k = 1.90 \times 10^8 \text{ M}^{-1} \text{ s}^{-1}$$

Rate constants for the reactions of potassium *O*-isopropyl dithiocarbonate (**2b**) with (dma)<sub>2</sub>CH<sup>+</sup> in CH<sub>3</sub>CN (20 °C, laser-flash photolysis techniques, λ = 607 nm).

| [P-salt] / mol L <sup>-1</sup> | [Nu] / mol L <sup>-1</sup> | [18-C-6] / mol L <sup>-1</sup> | <i>k</i> <sub>obs</sub> / s <sup>-1</sup> |
|--------------------------------|----------------------------|--------------------------------|-------------------------------------------|
| 3.34 × 10 <sup>-5</sup>        | 8.99 × 10 <sup>-4</sup>    | 1.17 × 10 <sup>-3</sup>        | 3.56 × 10 <sup>5</sup>                    |
| 3.34 × 10 <sup>-5</sup>        | 1.12 × 10 <sup>-3</sup>    | 1.46 × 10 <sup>-3</sup>        | 4.24 × 10 <sup>5</sup>                    |
| 3.34 × 10 <sup>-5</sup>        | 1.35 × 10 <sup>-3</sup>    | 1.76 × 10 <sup>-3</sup>        | 4.81 × 10 <sup>5</sup>                    |
| 3.34 × 10 <sup>-5</sup>        | 1.69 × 10 <sup>-3</sup>    | 2.20 × 10 <sup>-3</sup>        | 5.73 × 10 <sup>5</sup>                    |
| 3.34 × 10 <sup>-5</sup>        | 2.02 × 10 <sup>-3</sup>    | 2.63 × 10 <sup>-3</sup>        | 6.20 × 10 <sup>5</sup>                    |

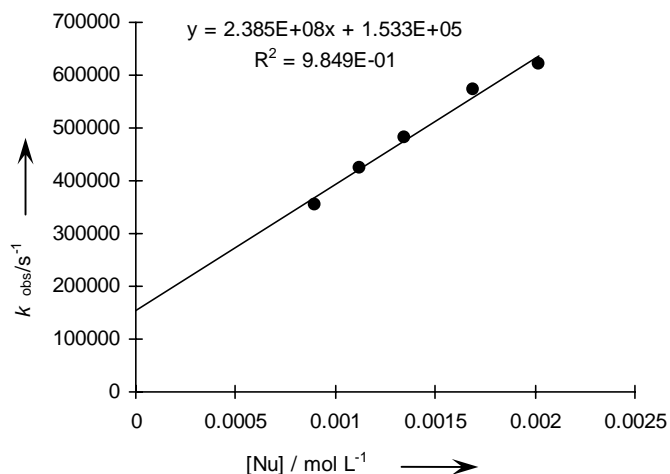

$$k = 2.39 \times 10^8 \text{ M}^{-1} \text{ s}^{-1}$$

Determination of the parameters  $N$  and  $s_N$  for **2b**

| Electrophiles                      | $E$    | $k$ ( $\text{M}^{-1} \text{s}^{-1}$ ) |
|------------------------------------|--------|---------------------------------------|
| (lil) <sub>2</sub> CH <sup>+</sup> | -10.04 | $2.77 \times 10^6$                    |
| (jul) <sub>2</sub> CH <sup>+</sup> | -9.45  | $7.67 \times 10^6$                    |
| (ind) <sub>2</sub> CH <sup>+</sup> | -8.76  | $2.54 \times 10^7$                    |
| (pyr) <sub>2</sub> CH <sup>+</sup> | -7.69  | $1.90 \times 10^8$                    |
| (dma) <sub>2</sub> CH <sup>+</sup> | -7.02  | $2.39 \times 10^{8^a}$                |

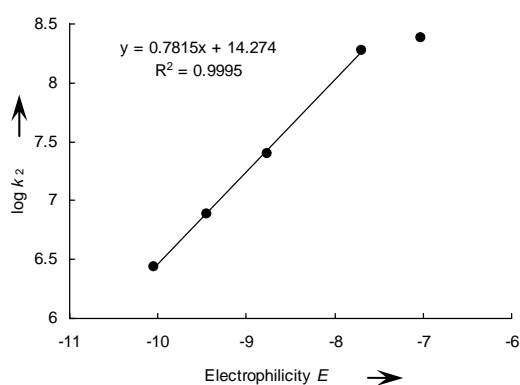

$N = 18.27$

$s_N = 0.78$

<sup>a</sup> Because of the proximity of the diffusion limit, not used for the calculation of  $N$  and  $s_N$ .

### Kinetics of the reaction of the **3a** with $\text{Ar}_2\text{CH}^+$ .

Rate constants for the reactions of potassium *N,N*-dimethyldithiocarbamate (**3a**) with  $(\text{liI})_2\text{CH}^+$  in  $\text{CH}_3\text{CN}$  (20 °C, laser-flash photolysis techniques,  $\lambda = 632 \text{ nm}$ ).

| [P-salt] / mol L <sup>-1</sup> | [Nu] / mol L <sup>-1</sup> | [18-C-6] / mol L <sup>-1</sup> | $k_{\text{obs}} / \text{s}^{-1}$ |
|--------------------------------|----------------------------|--------------------------------|----------------------------------|
| $2.91 \times 10^{-5}$          | $2.11 \times 10^{-4}$      | $3.80 \times 10^{-4}$          | $7.71 \times 10^3$               |
| $2.91 \times 10^{-5}$          | $4.22 \times 10^{-4}$      | $7.60 \times 10^{-4}$          | $1.85 \times 10^4$               |
| $2.91 \times 10^{-5}$          | $6.33 \times 10^{-4}$      | $1.14 \times 10^{-3}$          | $2.67 \times 10^4$               |
| $2.91 \times 10^{-5}$          | $8.44 \times 10^{-4}$      | $1.52 \times 10^{-3}$          | $3.39 \times 10^4$               |
| $2.91 \times 10^{-5}$          | $1.06 \times 10^{-3}$      | $1.90 \times 10^{-3}$          | $4.10 \times 10^4$               |

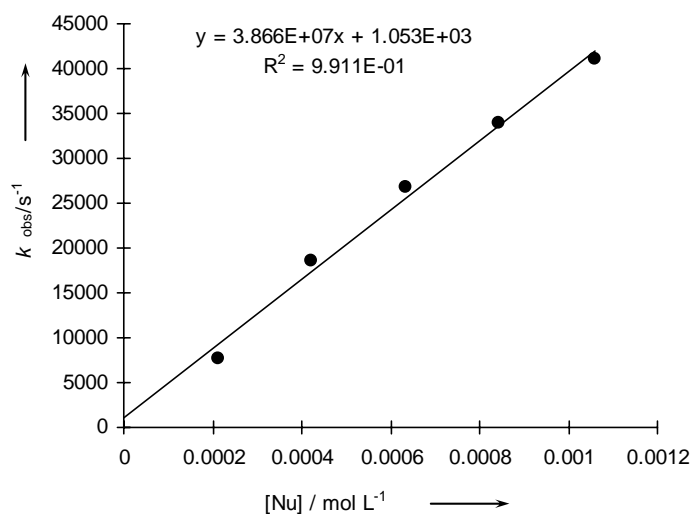

Rate constants for the reactions of potassium *N,N*-dimethyldithiocarbamate (**3a**) with  $(\text{jul})_2\text{CH}^+$  in  $\text{CH}_3\text{CN}$  (20 °C, laser-flash photolysis techniques,  $\lambda = 640 \text{ nm}$ ).

| [P-salt] / mol L <sup>-1</sup> | [Nu] / mol L <sup>-1</sup> | [18-C-6] / mol L <sup>-1</sup> | $k_{\text{obs}} / \text{s}^{-1}$ |
|--------------------------------|----------------------------|--------------------------------|----------------------------------|
| $3.15 \times 10^{-5}$          | $2.11 \times 10^{-4}$      | $3.80 \times 10^{-4}$          | $1.70 \times 10^4$               |
| $3.15 \times 10^{-5}$          | $4.22 \times 10^{-4}$      | $7.60 \times 10^{-4}$          | $3.93 \times 10^4$               |
| $3.15 \times 10^{-5}$          | $6.33 \times 10^{-4}$      | $1.14 \times 10^{-3}$          | $5.69 \times 10^4$               |
| $3.15 \times 10^{-5}$          | $8.44 \times 10^{-4}$      | $1.52 \times 10^{-3}$          | $7.23 \times 10^4$               |
| $3.15 \times 10^{-5}$          | $1.06 \times 10^{-4}$      | $1.90 \times 10^{-3}$          | $8.53 \times 10^4$               |

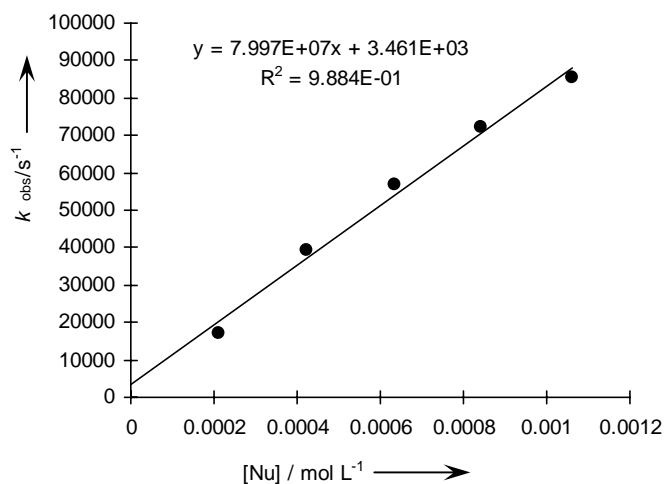

$$k = 8.00 \times 10^7 \text{ M}^{-1} \text{ s}^{-1}$$

Rate constants for the reactions of potassium *N,N*-dimethyldithiocarbamate (**3a**) with (ind)<sub>2</sub>CH<sup>+</sup> in CH<sub>3</sub>CN (20 °C, laser-flash photolysis techniques, λ = 616 nm).

| [P-salt] / mol L <sup>-1</sup> | [Nu] / mol L <sup>-1</sup> | [18-C-6] / mol L <sup>-1</sup> | <i>k</i> <sub>obs</sub> / s <sup>-1</sup> |
|--------------------------------|----------------------------|--------------------------------|-------------------------------------------|
| 2.33 × 10 <sup>-5</sup>        | 1.41 × 10 <sup>-4</sup>    | 2.65 × 10 <sup>-4</sup>        | 4.76 × 10 <sup>4</sup>                    |
| 2.33 × 10 <sup>-5</sup>        | 2.82 × 10 <sup>-4</sup>    | 5.30 × 10 <sup>-4</sup>        | 1.07 × 10 <sup>5</sup>                    |
| 2.33 × 10 <sup>-5</sup>        | 4.23 × 10 <sup>-4</sup>    | 7.94 × 10 <sup>-4</sup>        | 1.48 × 10 <sup>5</sup>                    |
| 2.33 × 10 <sup>-5</sup>        | 5.64 × 10 <sup>-4</sup>    | 1.06 × 10 <sup>-4</sup>        | 1.84 × 10 <sup>5</sup>                    |
| 2.33 × 10 <sup>-5</sup>        | 7.05 × 10 <sup>-4</sup>    | 1.32 × 10 <sup>-3</sup>        | 2.18 × 10 <sup>5</sup>                    |

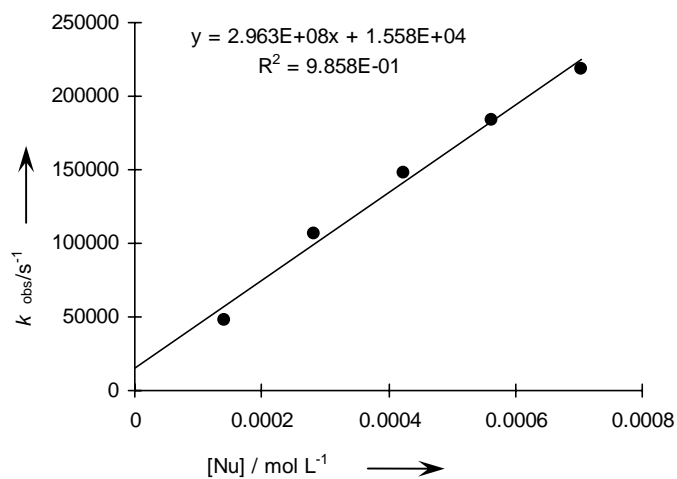

$$k = 2.96 \times 10^8 \text{ M}^{-1} \text{ s}^{-1}$$

Rate constants for the reactions of potassium *N,N*-dimethyldithiocarbamate (**3a**) with (pyr)<sub>2</sub>CH<sup>+</sup> in CH<sub>3</sub>CN (20 °C, laser-flash photolysis techniques, λ = 612 nm).

| [P-salt] / mol L <sup>-1</sup> | [Nu] / mol L <sup>-1</sup> | [18-C-6] / mol L <sup>-1</sup> | <i>k</i> <sub>obs</sub> / s <sup>-1</sup> |
|--------------------------------|----------------------------|--------------------------------|-------------------------------------------|
| 2.58 × 10 <sup>-5</sup>        | 1.41 × 10 <sup>-4</sup>    | 2.65 × 10 <sup>-4</sup>        | 2.75 × 10 <sup>5</sup>                    |
| 2.58 × 10 <sup>-5</sup>        | 2.82 × 10 <sup>-4</sup>    | 5.30 × 10 <sup>-4</sup>        | 5.45 × 10 <sup>5</sup>                    |
| 2.58 × 10 <sup>-5</sup>        | 4.23 × 10 <sup>-4</sup>    | 7.94 × 10 <sup>-4</sup>        | 8.15 × 10 <sup>5</sup>                    |
| 2.58 × 10 <sup>-5</sup>        | 5.64 × 10 <sup>-4</sup>    | 1.06 × 10 <sup>-4</sup>        | 1.05 × 10 <sup>6</sup>                    |
| 2.58 × 10 <sup>-5</sup>        | 7.05 × 10 <sup>-4</sup>    | 1.32 × 10 <sup>-3</sup>        | 1.25 × 10 <sup>6</sup>                    |

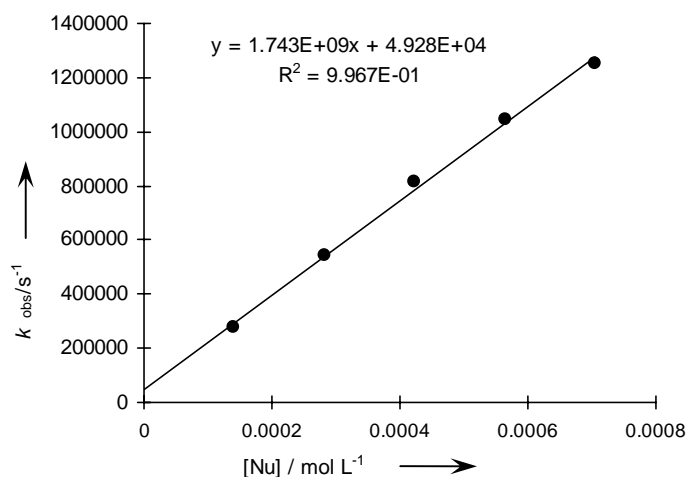

Rate constants for the reactions of potassium *N,N*-dimethyldithiocarbamate (**3a**) with (dma)<sub>2</sub>CH<sup>+</sup> in CH<sub>3</sub>CN (20 °C, laser-flash photolysis techniques, λ = 607 nm).

| [P-salt] / mol L <sup>-1</sup> | [Nu] / mol L <sup>-1</sup> | [18-C-6] / mol L <sup>-1</sup> | <i>k</i> <sub>obs</sub> / s <sup>-1</sup> |
|--------------------------------|----------------------------|--------------------------------|-------------------------------------------|
| 1.91 × 10 <sup>-5</sup>        | 1.41 × 10 <sup>-4</sup>    | 2.46 × 10 <sup>-4</sup>        | 5.56 × 10 <sup>5</sup>                    |
| 1.91 × 10 <sup>-5</sup>        | 2.82 × 10 <sup>-4</sup>    | 4.92 × 10 <sup>-4</sup>        | 1.06 × 10 <sup>6</sup>                    |
| 1.91 × 10 <sup>-5</sup>        | 4.23 × 10 <sup>-4</sup>    | 7.38 × 10 <sup>-4</sup>        | 1.59 × 10 <sup>6</sup>                    |
| 1.91 × 10 <sup>-5</sup>        | 5.64 × 10 <sup>-4</sup>    | 9.84 × 10 <sup>-4</sup>        | 2.09 × 10 <sup>6</sup>                    |
| 1.91 × 10 <sup>-5</sup>        | 7.05 × 10 <sup>-4</sup>    | 1.23 × 10 <sup>-3</sup>        | 2.40 × 10 <sup>6</sup>                    |

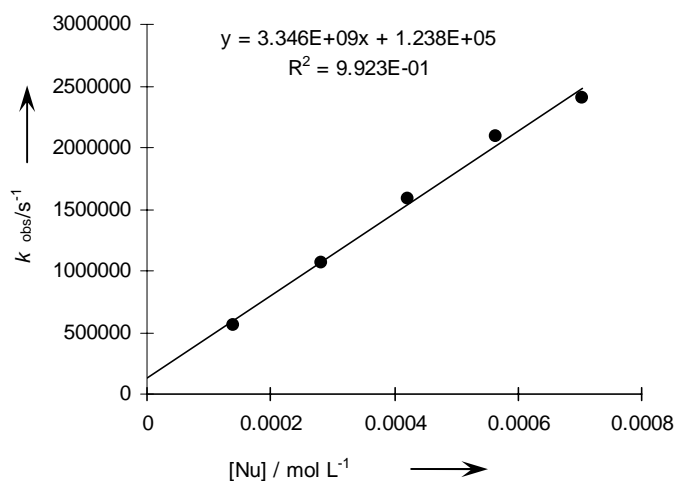

Determination of the parameters  $N$  and  $s_N$  for **3a**

| Electrophiles                      | $E$    | $k$ ( $M^{-1} s^{-1}$ )         |
|------------------------------------|--------|---------------------------------|
| (lil) <sub>2</sub> CH <sup>+</sup> | -10.04 | $3.87 \times 10^7$              |
| (jul) <sub>2</sub> CH <sup>+</sup> | -9.45  | $8.00 \times 10^7$              |
| (ind) <sub>2</sub> CH <sup>+</sup> | -8.76  | $2.96 \times 10^8$              |
| (pyr) <sub>2</sub> CH <sup>+</sup> | -7.69  | $1.74 \times 10^9$ <sup>a</sup> |
| (dma) <sub>2</sub> CH <sup>+</sup> | -7.02  | $3.35 \times 10^9$ <sup>a</sup> |

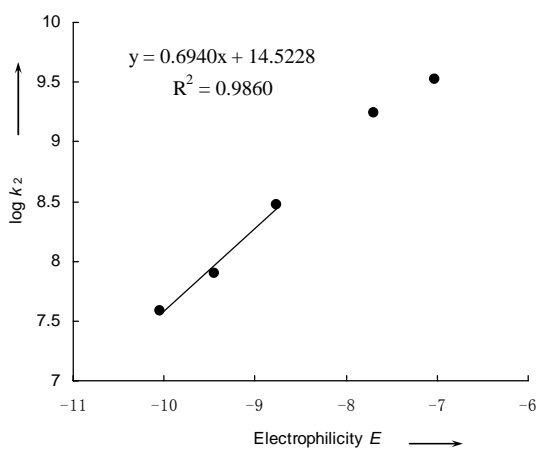

$N = 20.93$

$s_N = 0.69$

<sup>a</sup> Because of the proximity of the diffusion limit, not used for the calculation of  $N$  and  $s_N$ .



### Kinetics of the reaction of **3b** with $\text{Ar}_2\text{CH}^+$ .

Rate constants for the reactions of potassium pyrrolidinedithiocarbamate (**3b**) with  $(\text{liI})_2\text{CH}^+$  in  $\text{CH}_3\text{CN}$  (20 °C, laser-flash photolysis techniques,  $\lambda = 632 \text{ nm}$ ).

| [P-salt] / mol L <sup>-1</sup> | [Nu] / mol L <sup>-1</sup> | [18-C-6] / mol L <sup>-1</sup> | $k_{\text{obs}} / \text{s}^{-1}$ |
|--------------------------------|----------------------------|--------------------------------|----------------------------------|
| $3.21 \times 10^{-5}$          | $1.90 \times 10^{-4}$      | $3.93 \times 10^{-4}$          | $1.28 \times 10^4$               |
| $3.21 \times 10^{-5}$          | $2.85 \times 10^{-4}$      | $5.90 \times 10^{-4}$          | $1.98 \times 10^4$               |
| $3.21 \times 10^{-5}$          | $3.80 \times 10^{-4}$      | $7.86 \times 10^{-4}$          | $2.65 \times 10^4$               |
| $3.21 \times 10^{-5}$          | $4.75 \times 10^{-4}$      | $9.83 \times 10^{-4}$          | $3.25 \times 10^4$               |
| $3.21 \times 10^{-5}$          | $5.70 \times 10^{-4}$      | $1.18 \times 10^{-3}$          | $3.80 \times 10^4$               |

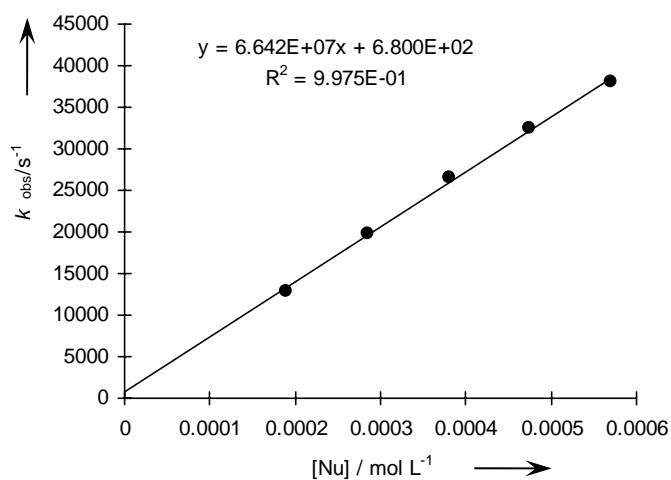

$$k = 6.64 \times 10^7 \text{ M}^{-1} \text{ s}^{-1}$$

Rate constants for the reactions of potassium pyrrolidinedithiocarbamate (**3b**) with  $(\text{jul})_2\text{CH}^+$  in  $\text{CH}_3\text{CN}$  (20 °C, laser-flash photolysis techniques,  $\lambda = 640 \text{ nm}$ ).

| [P-salt] / mol L <sup>-1</sup> | [Nu] / mol L <sup>-1</sup> | [18-C-6] / mol L <sup>-1</sup> | $k_{\text{obs}} / \text{s}^{-1}$ |
|--------------------------------|----------------------------|--------------------------------|----------------------------------|
| $3.15 \times 10^{-5}$          | $1.90 \times 10^{-4}$      | $3.93 \times 10^{-4}$          | $2.92 \times 10^4$               |
| $3.15 \times 10^{-5}$          | $2.85 \times 10^{-4}$      | $5.90 \times 10^{-4}$          | $4.65 \times 10^4$               |
| $3.15 \times 10^{-5}$          | $3.80 \times 10^{-4}$      | $7.86 \times 10^{-4}$          | $6.25 \times 10^4$               |
| $3.15 \times 10^{-5}$          | $4.75 \times 10^{-4}$      | $9.83 \times 10^{-4}$          | $7.61 \times 10^4$               |
| $3.15 \times 10^{-5}$          | $5.70 \times 10^{-4}$      | $1.18 \times 10^{-3}$          | $8.91 \times 10^4$               |

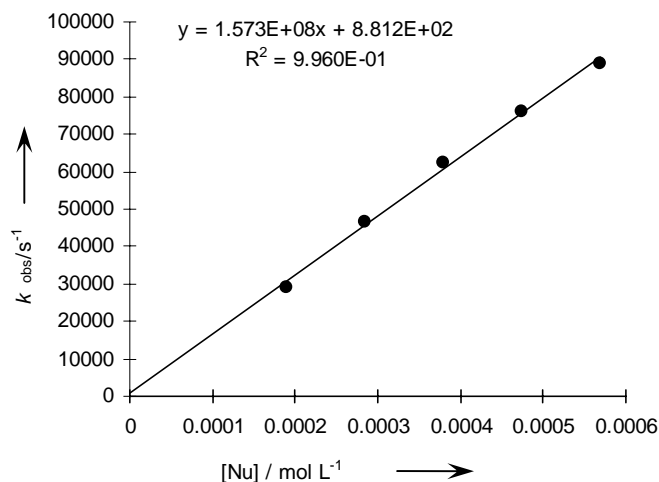

Rate constants for the reactions of potassium pyrrolidinedithiocarbamate (**3b**) with  $(\text{ind})_2\text{CH}^+$  in  $\text{CH}_3\text{CN}$  (20 °C, laser-flash photolysis techniques,  $\lambda = 616 \text{ nm}$ ).

| [P-salt] / mol L <sup>-1</sup> | [Nu] / mol L <sup>-1</sup> | [18-C-6] / mol L <sup>-1</sup> | $k_{\text{obs}} / \text{s}^{-1}$ |
|--------------------------------|----------------------------|--------------------------------|----------------------------------|
| $2.54 \times 10^{-5}$          | $1.81 \times 10^{-4}$      | $3.78 \times 10^{-4}$          | $7.60 \times 10^4$               |
| $2.54 \times 10^{-5}$          | $3.62 \times 10^{-4}$      | $7.57 \times 10^{-4}$          | $1.55 \times 10^5$               |
| $2.54 \times 10^{-5}$          | $5.43 \times 10^{-4}$      | $1.13 \times 10^{-3}$          | $2.26 \times 10^5$               |
| $2.54 \times 10^{-5}$          | $7.24 \times 10^{-4}$      | $1.51 \times 10^{-3}$          | $3.11 \times 10^5$               |

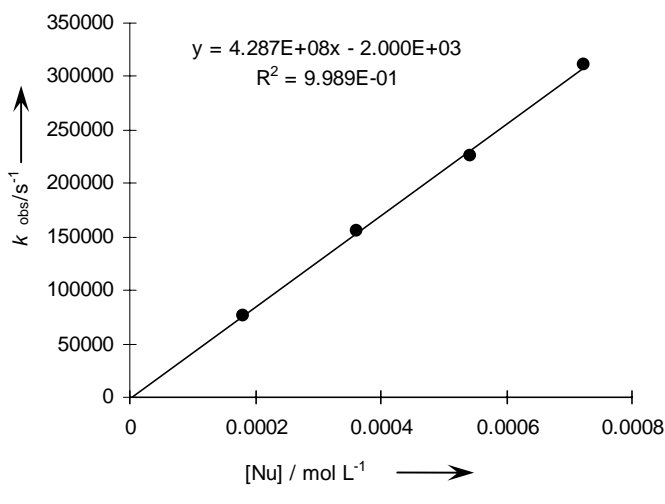

Rate constants for the reactions of potassium pyrrolidinedithiocarbamate (**3b**) with  $(\text{pyr})_2\text{CH}^+$  in  $\text{CH}_3\text{CN}$  (20 °C, laser-flash photolysis techniques,  $\lambda = 612 \text{ nm}$ ).

| [P-salt] / mol L <sup>-1</sup> | [Nu] / mol L <sup>-1</sup> | [18-C-6] / mol L <sup>-1</sup> | $k_{\text{obs}} / \text{s}^{-1}$ |
|--------------------------------|----------------------------|--------------------------------|----------------------------------|
| $2.58 \times 10^{-5}$          | $1.81 \times 10^{-4}$      | $3.78 \times 10^{-4}$          | $3.96 \times 10^5$               |
| $2.58 \times 10^{-5}$          | $3.62 \times 10^{-4}$      | $7.57 \times 10^{-4}$          | $7.81 \times 10^5$               |
| $2.58 \times 10^{-5}$          | $5.43 \times 10^{-4}$      | $1.13 \times 10^{-3}$          | $1.14 \times 10^6$               |

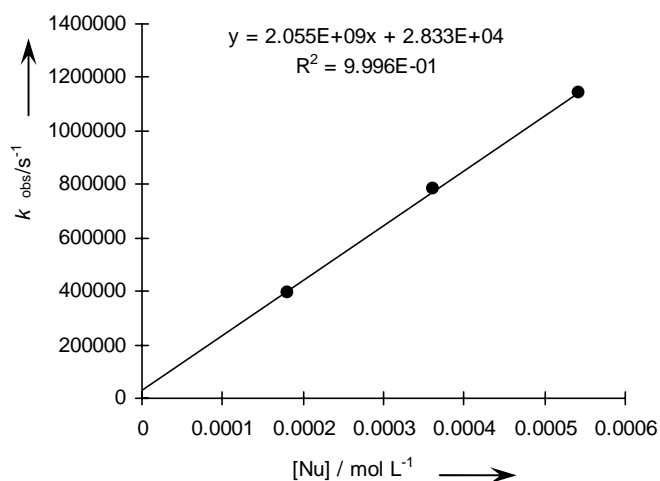

Determination of the parameters  $N$  and  $s_N$  for **3b**

| Electrophiles                               | $E$    | $k$ ( $\text{M}^{-1} \text{s}^{-1}$ ) |
|---------------------------------------------|--------|---------------------------------------|
| ( <i>lil</i> ) <sub>2</sub> CH <sup>+</sup> | -10.04 | $6.64 \times 10^7$                    |
| ( <i>jul</i> ) <sub>2</sub> CH <sup>+</sup> | -9.45  | $1.57 \times 10^8$                    |
| ( <i>ind</i> ) <sub>2</sub> CH <sup>+</sup> | -8.76  | $4.29 \times 10^8$                    |
| ( <i>pyr</i> ) <sub>2</sub> CH <sup>+</sup> | -7.69  | $2.06 \times 10^9$ <sup>a</sup>       |

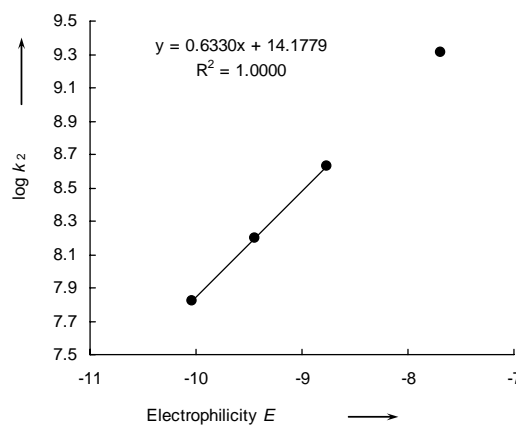

$N = 22.40$

$s_N = 0.63$

<sup>a</sup> Because of the proximity of the diffusion limit,  
 not used for the calculation of  $N$  and  $s_N$ .

### Kinetics of the reaction of **3c** with $\text{Ar}_2\text{CH}^+$ .

Rate constants for the reactions of potassium piperidine-1-carbodithioate (**3c**) with  $(\text{liI})_2\text{CH}^+$  in  $\text{CH}_3\text{CN}$  (20 °C, laser-flash photolysis techniques,  $\lambda = 632 \text{ nm}$ ).

| [P-salt] / mol L <sup>-1</sup> | [Nu] / mol L <sup>-1</sup> | [18-C-6] / mol L <sup>-1</sup> | $k_{\text{obs}} / \text{s}^{-1}$ |
|--------------------------------|----------------------------|--------------------------------|----------------------------------|
| $3.21 \times 10^{-5}$          | $1.81 \times 10^{-4}$      | $3.93 \times 10^{-4}$          | $1.56 \times 10^4$               |
| $3.21 \times 10^{-5}$          | $2.72 \times 10^{-4}$      | $5.90 \times 10^{-4}$          | $2.41 \times 10^4$               |
| $3.21 \times 10^{-5}$          | $3.62 \times 10^{-4}$      | $7.87 \times 10^{-4}$          | $3.15 \times 10^4$               |
| $3.21 \times 10^{-5}$          | $4.53 \times 10^{-4}$      | $9.84 \times 10^{-4}$          | $3.80 \times 10^4$               |
| $3.21 \times 10^{-5}$          | $5.43 \times 10^{-4}$      | $1.18 \times 10^{-3}$          | $4.39 \times 10^4$               |

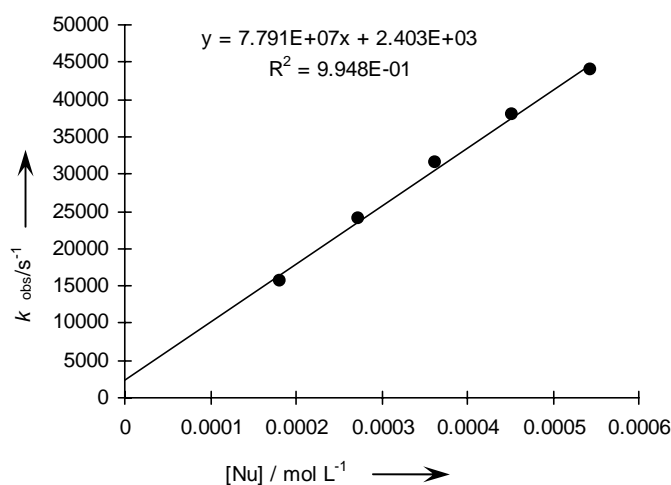

$$k = 7.79 \times 10^7 \text{ M}^{-1} \text{ s}^{-1}$$

Rate constants for the reactions of potassium piperidine-1-carbodithioate (**3c**) with  $(\text{jul})_2\text{CH}^+$  in  $\text{CH}_3\text{CN}$  (20 °C, laser-flash photolysis techniques,  $\lambda = 640 \text{ nm}$ ).

| [P-salt] / mol L <sup>-1</sup> | [Nu] / mol L <sup>-1</sup> | [18-C-6] / mol L <sup>-1</sup> | $k_{\text{obs}} / \text{s}^{-1}$ |
|--------------------------------|----------------------------|--------------------------------|----------------------------------|
| $3.15 \times 10^{-5}$          | $1.81 \times 10^{-4}$      | $3.93 \times 10^{-4}$          | $3.62 \times 10^4$               |
| $3.15 \times 10^{-5}$          | $2.72 \times 10^{-4}$      | $5.90 \times 10^{-4}$          | $5.52 \times 10^4$               |
| $3.15 \times 10^{-5}$          | $3.62 \times 10^{-4}$      | $7.87 \times 10^{-4}$          | $7.33 \times 10^4$               |
| $3.15 \times 10^{-5}$          | $4.53 \times 10^{-4}$      | $9.84 \times 10^{-4}$          | $8.79 \times 10^4$               |
| $3.15 \times 10^{-5}$          | $5.43 \times 10^{-4}$      | $1.18 \times 10^{-3}$          | $1.11 \times 10^5$               |

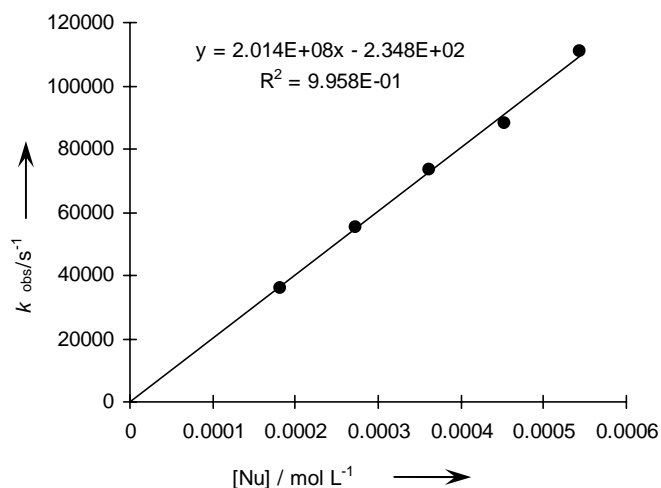

Rate constants for the reactions of potassium piperidine-1-carbodithioate (**3c**) with  $(\text{ind})_2\text{CH}^+$  in  $\text{CH}_3\text{CN}$  (20 °C, laser-flash photolysis techniques,  $\lambda = 616 \text{ nm}$ ).

| [P-salt] / mol L <sup>-1</sup> | [Nu] / mol L <sup>-1</sup> | [18-C-6] / mol L <sup>-1</sup> | $k_{\text{obs}} / \text{s}^{-1}$ |
|--------------------------------|----------------------------|--------------------------------|----------------------------------|
| $2.75 \times 10^{-5}$          | $1.44 \times 10^{-4}$      | $3.33 \times 10^{-4}$          | $5.79 \times 10^4$               |
| $2.75 \times 10^{-5}$          | $2.16 \times 10^{-4}$      | $4.99 \times 10^{-4}$          | $9.28 \times 10^4$               |
| $2.75 \times 10^{-5}$          | $2.88 \times 10^{-4}$      | $6.66 \times 10^{-4}$          | $1.24 \times 10^5$               |
| $2.75 \times 10^{-5}$          | $3.60 \times 10^{-4}$      | $8.32 \times 10^{-4}$          | $1.53 \times 10^5$               |
| $2.75 \times 10^{-5}$          | $4.32 \times 10^{-4}$      | $1.04 \times 10^{-3}$          | $1.81 \times 10^5$               |

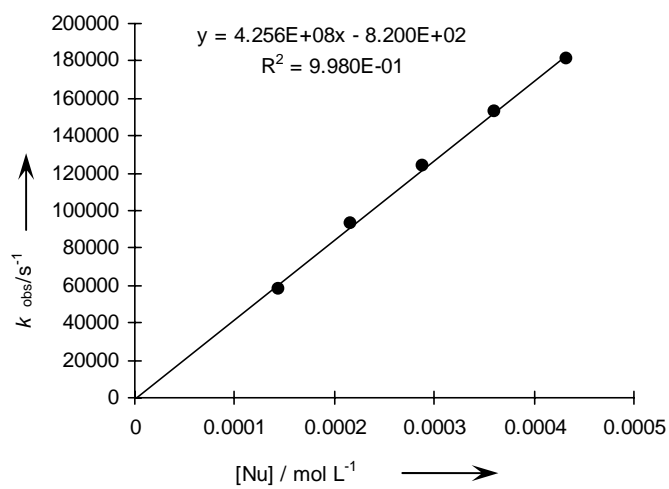

Rate constants for the reactions of potassium piperidine-1-carbodithioate (**3c**) with (pyr)<sub>2</sub>CH<sup>+</sup> in CH<sub>3</sub>CN (20 °C, laser-flash photolysis techniques, λ = 612 nm).

| [P-salt] / mol L <sup>-1</sup> | [Nu] / mol L <sup>-1</sup> | [18-C-6] / mol L <sup>-1</sup> | k <sub>obs</sub> / s <sup>-1</sup> |
|--------------------------------|----------------------------|--------------------------------|------------------------------------|
| 2.74 × 10 <sup>-5</sup>        | 1.44 × 10 <sup>-4</sup>    | 3.33 × 10 <sup>-4</sup>        | 3.21 × 10 <sup>5</sup>             |
| 2.74 × 10 <sup>-5</sup>        | 2.16 × 10 <sup>-4</sup>    | 4.99 × 10 <sup>-4</sup>        | 4.84 × 10 <sup>5</sup>             |
| 2.74 × 10 <sup>-5</sup>        | 2.88 × 10 <sup>-4</sup>    | 6.66 × 10 <sup>-4</sup>        | 6.42 × 10 <sup>5</sup>             |
| 2.74 × 10 <sup>-5</sup>        | 3.60 × 10 <sup>-4</sup>    | 8.32 × 10 <sup>-4</sup>        | 7.59 × 10 <sup>5</sup>             |

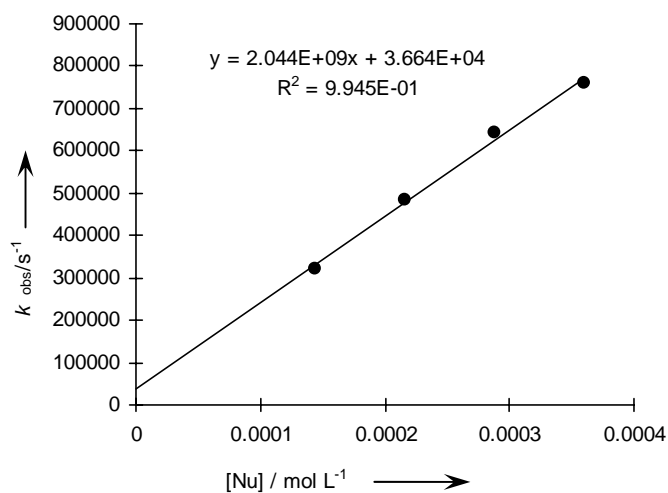

$$k = 2.04 \times 10^9 \text{ M}^{-1} \text{ s}^{-1}$$

Determination of the parameters  $N$  and  $s_N$  for **3c**

| Electrophiles                      | $E$    | $k$ (M <sup>-1</sup> s <sup>-1</sup> ) |                             |
|------------------------------------|--------|----------------------------------------|-----------------------------|
| (lil) <sub>2</sub> CH <sup>+</sup> | -10.04 | $7.79 \times 10^7$                     | $N = 23.84$<br>$s_N = 0.57$ |
| (jul) <sub>2</sub> CH <sup>+</sup> | -9.45  | $2.01 \times 10^8$                     |                             |
| (ind) <sub>2</sub> CH <sup>+</sup> | -8.76  | $4.26 \times 10^8$                     |                             |
| (pyr) <sub>2</sub> CH <sup>+</sup> | -7.69  | $2.04 \times 10^9$ <sup>a</sup>        |                             |

  

<sup>a</sup> Because of the proximity of the diffusion limit, not used for the calculation of  $N$  and  $s_N$ .

### Kinetics of the reaction of **3d** with $\text{Ar}_2\text{CH}^+$ .

Rate constants for the reactions of potassium 4-methyl-1-piperazinecarbodithioate (**3d**) with  $(\text{liI})_2\text{CH}^+$  in  $\text{CH}_3\text{CN}$  (20 °C, laser-flash photolysis techniques,  $\lambda = 632 \text{ nm}$ ).

| [P-salt] / mol L <sup>-1</sup> | [Nu] / mol L <sup>-1</sup> | [18-C-6] / mol L <sup>-1</sup> | $k_{\text{obs}} / \text{s}^{-1}$ |
|--------------------------------|----------------------------|--------------------------------|----------------------------------|
| $3.21 \times 10^{-5}$          | $1.92 \times 10^{-4}$      | $3.93 \times 10^{-4}$          | $8.35 \times 10^3$               |
| $3.21 \times 10^{-5}$          | $2.88 \times 10^{-4}$      | $5.90 \times 10^{-4}$          | $1.35 \times 10^4$               |
| $3.21 \times 10^{-5}$          | $3.84 \times 10^{-4}$      | $7.87 \times 10^{-4}$          | $1.82 \times 10^4$               |
| $3.21 \times 10^{-5}$          | $4.80 \times 10^{-4}$      | $9.84 \times 10^{-4}$          | $2.23 \times 10^4$               |
| $3.21 \times 10^{-5}$          | $5.76 \times 10^{-4}$      | $1.18 \times 10^{-3}$          | $2.67 \times 10^4$               |

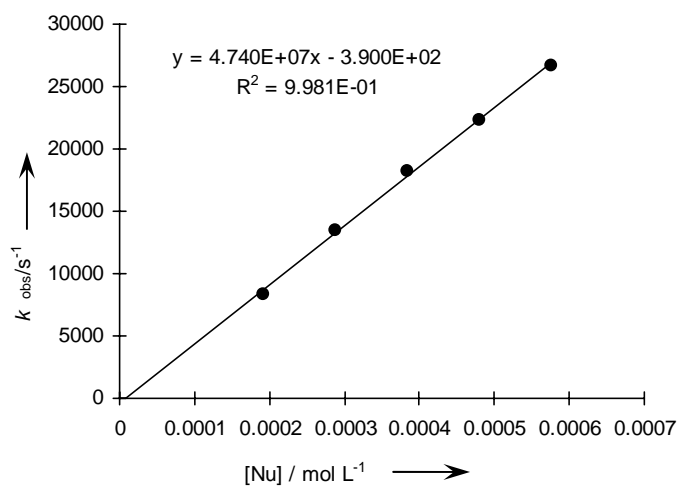

$$k = 4.74 \times 10^7 \text{ M}^{-1} \text{ s}^{-1}$$

Rate constants for the reactions of potassium 4-methyl-1-piperazinecarbodithioate (**3d**) with  $(\text{jul})_2\text{CH}^+$  in  $\text{CH}_3\text{CN}$  (20 °C, laser-flash photolysis techniques,  $\lambda = 640 \text{ nm}$ ).

| [P-salt] / mol L <sup>-1</sup> | [Nu] / mol L <sup>-1</sup> | [18-C-6] / mol L <sup>-1</sup> | $k_{\text{obs}} / \text{s}^{-1}$ |
|--------------------------------|----------------------------|--------------------------------|----------------------------------|
| $3.15 \times 10^{-5}$          | $1.92 \times 10^{-4}$      | $3.93 \times 10^{-4}$          | $2.34 \times 10^4$               |
| $3.15 \times 10^{-5}$          | $2.88 \times 10^{-4}$      | $5.90 \times 10^{-4}$          | $3.37 \times 10^4$               |
| $3.15 \times 10^{-5}$          | $3.84 \times 10^{-4}$      | $7.87 \times 10^{-4}$          | $4.46 \times 10^4$               |
| $3.15 \times 10^{-5}$          | $4.80 \times 10^{-4}$      | $9.84 \times 10^{-4}$          | $5.47 \times 10^4$               |
| $3.15 \times 10^{-5}$          | $5.76 \times 10^{-4}$      | $1.18 \times 10^{-3}$          | $6.44 \times 10^4$               |

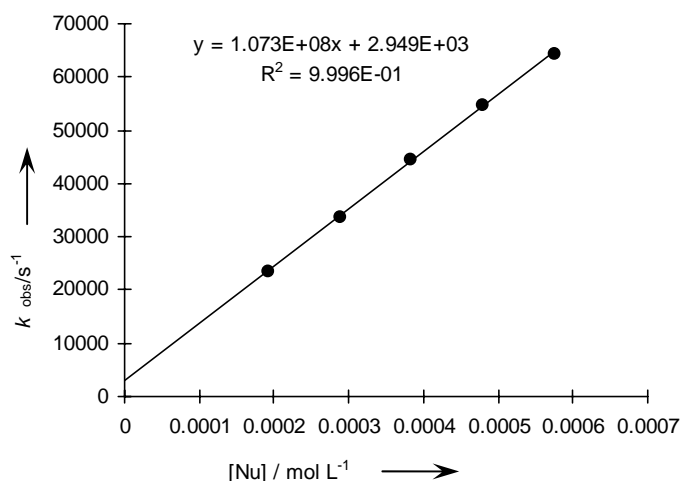

$$k = 1.07 \times 10^8 \text{ M}^{-1} \text{ s}^{-1}$$

Rate constants for the reactions of potassium 4-methyl-1-piperazinecarbodithioate (**3d**) with  $(\text{ind})_2\text{CH}^+$  in  $\text{CH}_3\text{CN}$  (20 °C, laser-flash photolysis techniques,  $\lambda = 616 \text{ nm}$ ).

| [P-salt] / mol L <sup>-1</sup> | [Nu] / mol L <sup>-1</sup> | [18-C-6] / mol L <sup>-1</sup> | $k_{\text{obs}} / \text{s}^{-1}$ |
|--------------------------------|----------------------------|--------------------------------|----------------------------------|
| $2.75 \times 10^{-5}$          | $1.53 \times 10^{-4}$      | $3.78 \times 10^{-4}$          | $3.54 \times 10^4$               |
| $2.75 \times 10^{-5}$          | $2.30 \times 10^{-4}$      | $5.68 \times 10^{-4}$          | $5.67 \times 10^4$               |
| $2.75 \times 10^{-5}$          | $3.06 \times 10^{-4}$      | $7.57 \times 10^{-4}$          | $7.73 \times 10^4$               |
| $2.75 \times 10^{-5}$          | $3.83 \times 10^{-4}$      | $9.46 \times 10^{-4}$          | $9.61 \times 10^4$               |
| $2.75 \times 10^{-5}$          | $4.59 \times 10^{-4}$      | $1.13 \times 10^{-3}$          | $1.12 \times 10^5$               |

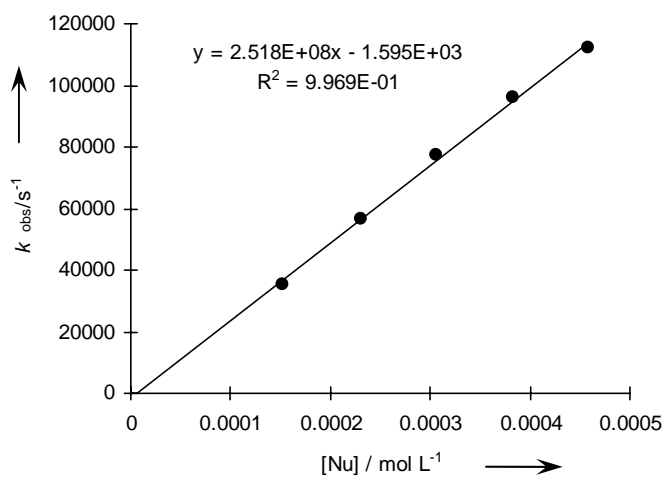

$$k = 2.52 \times 10^8 \text{ M}^{-1} \text{ s}^{-1}$$



Rate constants for the reactions of potassium 4-methyl-1-piperazinecarbodithioate (**3d**) with  $(\text{pyr})_2\text{CH}^+$  in  $\text{CH}_3\text{CN}$  (20 °C, laser-flash photolysis techniques,  $\lambda = 612 \text{ nm}$ ).

| [P-salt] / mol L <sup>-1</sup> | [Nu] / mol L <sup>-1</sup> | [18-C-6] / mol L <sup>-1</sup> | $k_{\text{obs}} / \text{s}^{-1}$ |
|--------------------------------|----------------------------|--------------------------------|----------------------------------|
| $2.74 \times 10^{-5}$          | $1.53 \times 10^{-4}$      | $3.78 \times 10^{-4}$          | $2.18 \times 10^5$               |
| $2.74 \times 10^{-5}$          | $2.30 \times 10^{-4}$      | $5.68 \times 10^{-4}$          | $3.50 \times 10^5$               |
| $2.74 \times 10^{-5}$          | $3.06 \times 10^{-4}$      | $7.57 \times 10^{-4}$          | $4.35 \times 10^5$               |
| $2.74 \times 10^{-5}$          | $3.83 \times 10^{-4}$      | $9.46 \times 10^{-4}$          | $5.44 \times 10^5$               |
| $2.74 \times 10^{-5}$          | $4.59 \times 10^{-4}$      | $1.13 \times 10^{-3}$          | $6.58 \times 10^5$               |

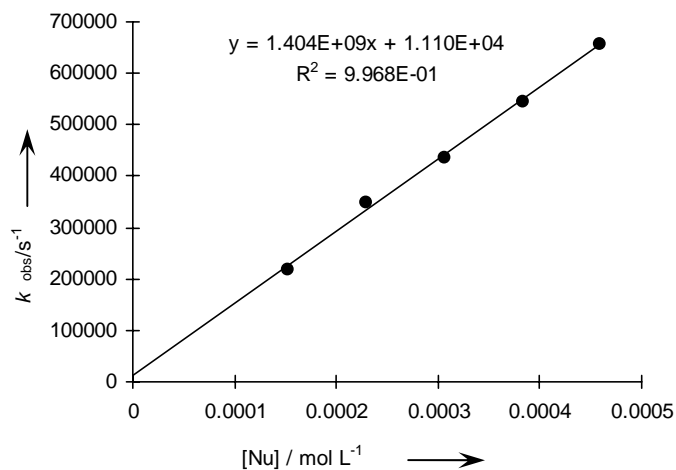

$$k = 1.40 \times 10^9 \text{ M}^{-1} \text{ s}^{-1}$$

Determination of the parameters  $N$  and  $s_N$  for **3d**

| Electrophiles               | $E$    | $k (\text{M}^{-1} \text{ s}^{-1})$ |
|-----------------------------|--------|------------------------------------|
| $(\text{lil})_2\text{CH}^+$ | -10.04 | $4.74 \times 10^7$                 |
| $(\text{jul})_2\text{CH}^+$ | -9.45  | $1.07 \times 10^8$                 |
| $(\text{ind})_2\text{CH}^+$ | -8.76  | $2.52 \times 10^8$                 |
| $(\text{pyr})_2\text{CH}^+$ | -7.69  | $1.40 \times 10^9$ <sup>a</sup>    |

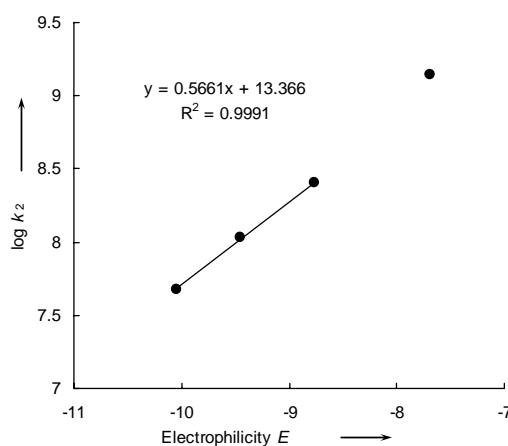

$$N = 23.61$$

$$s_N = 0.57$$

<sup>a</sup> Because of the proximity of the diffusion limit, not used for the calculation of  $N$  and  $s_N$ .

### Kinetics of the reaction of **3e** with $\text{Ar}_2\text{CH}^+$ .

Rate constants for the reactions of potassium morpholino-4-dithiocarboxylate (**3e**) with  $(\text{liI})_2\text{CH}^+$  in  $\text{CH}_3\text{CN}$  (20 °C, laser-flash photolysis techniques,  $\lambda = 632 \text{ nm}$ ).

| [P-salt] / mol L <sup>-1</sup> | [Nu] / mol L <sup>-1</sup> | [18-C-6] / mol L <sup>-1</sup> | $k_{\text{obs}} / \text{s}^{-1}$ |
|--------------------------------|----------------------------|--------------------------------|----------------------------------|
| $3.21 \times 10^{-5}$          | $1.93 \times 10^{-4}$      | $4.39 \times 10^{-4}$          | $5.82 \times 10^3$               |
| $3.21 \times 10^{-5}$          | $2.90 \times 10^{-4}$      | $6.59 \times 10^{-4}$          | $8.96 \times 10^3$               |
| $3.21 \times 10^{-5}$          | $3.86 \times 10^{-4}$      | $8.78 \times 10^{-4}$          | $1.20 \times 10^4$               |
| $3.21 \times 10^{-5}$          | $4.83 \times 10^{-4}$      | $1.10 \times 10^{-3}$          | $1.47 \times 10^4$               |
| $3.21 \times 10^{-5}$          | $5.79 \times 10^{-4}$      | $1.32 \times 10^{-3}$          | $1.68 \times 10^4$               |

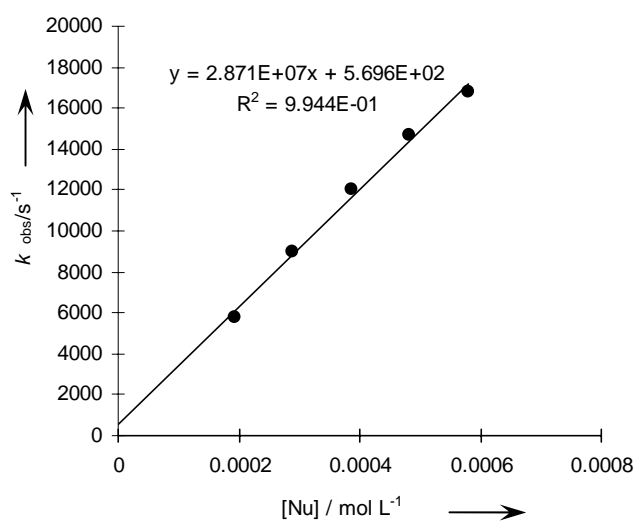

Rate constants for the reactions of potassium morpholino-4-dithiocarboxylate (**3e**) with  $(\text{jul})_2\text{CH}^+$  in  $\text{CH}_3\text{CN}$  (20 °C, laser-flash photolysis techniques,  $\lambda = 640 \text{ nm}$ ).

| [P-salt] / mol L <sup>-1</sup> | [Nu] / mol L <sup>-1</sup> | [18-C-6] / mol L <sup>-1</sup> | $k_{\text{obs}} / \text{s}^{-1}$ |
|--------------------------------|----------------------------|--------------------------------|----------------------------------|
| $3.15 \times 10^{-5}$          | $1.93 \times 10^{-4}$      | $4.39 \times 10^{-4}$          | $1.39 \times 10^4$               |
| $3.15 \times 10^{-5}$          | $2.90 \times 10^{-4}$      | $6.59 \times 10^{-4}$          | $2.22 \times 10^4$               |
| $3.15 \times 10^{-5}$          | $3.86 \times 10^{-4}$      | $8.78 \times 10^{-4}$          | $2.89 \times 10^4$               |
| $3.15 \times 10^{-5}$          | $4.83 \times 10^{-4}$      | $1.10 \times 10^{-3}$          | $3.53 \times 10^4$               |
| $3.15 \times 10^{-5}$          | $5.79 \times 10^{-4}$      | $1.32 \times 10^{-3}$          | $4.15 \times 10^4$               |

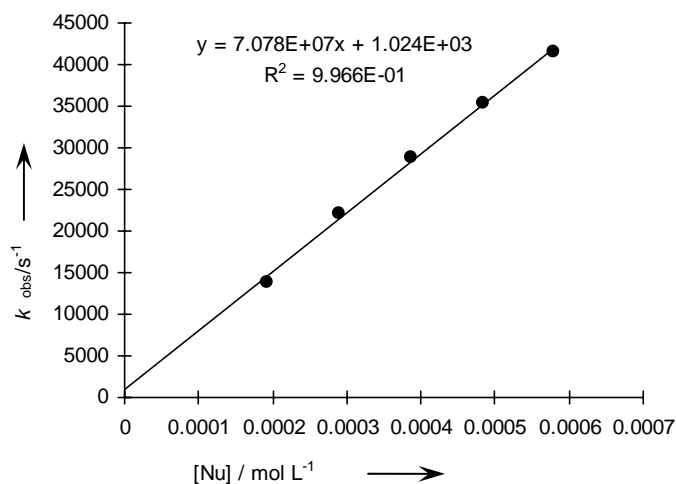

Rate constants for the reactions of potassium morpholino-4-dithiocarboxylate (**3e**) with  $(\text{ind})_2\text{CH}^+$  in  $\text{CH}_3\text{CN}$  (20 °C, laser-flash photolysis techniques,  $\lambda = 616 \text{ nm}$ ).

| [P-salt] / mol L <sup>-1</sup> | [Nu] / mol L <sup>-1</sup> | [18-C-6] / mol L <sup>-1</sup> | $k_{\text{obs}} / \text{s}^{-1}$ |
|--------------------------------|----------------------------|--------------------------------|----------------------------------|
| $2.54 \times 10^{-5}$          | $1.79 \times 10^{-4}$      | $3.75 \times 10^{-4}$          | $3.54 \times 10^4$               |
| $2.54 \times 10^{-5}$          | $3.58 \times 10^{-4}$      | $7.52 \times 10^{-4}$          | $7.44 \times 10^4$               |
| $2.54 \times 10^{-5}$          | $5.37 \times 10^{-4}$      | $1.13 \times 10^{-3}$          | $1.03 \times 10^5$               |

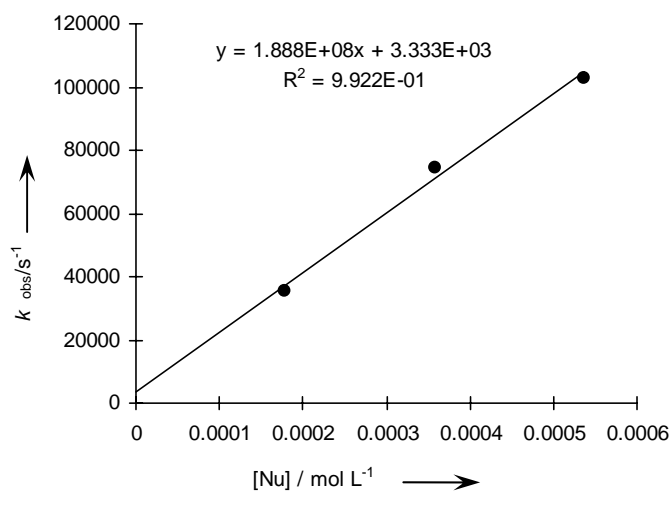

Rate constants for the reactions of potassium morpholino-4-dithiocarboxylate (**3e**) with  $(\text{pyr})_2\text{CH}^+$  in  $\text{CH}_3\text{CN}$  (20 °C, laser-flash photolysis techniques,  $\lambda = 612 \text{ nm}$ ).

| [P-salt] / mol L <sup>-1</sup> | [Nu] / mol L <sup>-1</sup> | [18-C-6] / mol L <sup>-1</sup> | $k_{\text{obs}} / \text{s}^{-1}$ |
|--------------------------------|----------------------------|--------------------------------|----------------------------------|
| $3.44 \times 10^{-5}$          | $1.79 \times 10^{-4}$      | $3.75 \times 10^{-4}$          | $1.76 \times 10^5$               |
| $3.44 \times 10^{-5}$          | $3.58 \times 10^{-4}$      | $7.52 \times 10^{-4}$          | $3.95 \times 10^5$               |
| $3.44 \times 10^{-5}$          | $5.37 \times 10^{-4}$      | $1.13 \times 10^{-3}$          | $5.63 \times 10^5$               |

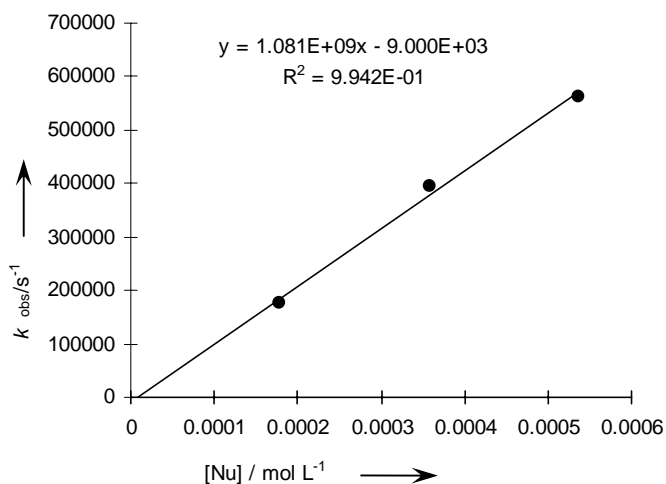

$$k = 1.08 \times 10^9 \text{ M}^{-1} \text{ s}^{-1}$$

### Determination of the parameters $N$ and $s_N$ for **3e**

| Electrophiles                      | $E$    | $k$ ( $\text{M}^{-1} \text{s}^{-1}$ ) |
|------------------------------------|--------|---------------------------------------|
| (lil) <sub>2</sub> CH <sup>+</sup> | -10.04 | $2.87 \times 10^7$                    |
| (jul) <sub>2</sub> CH <sup>+</sup> | -9.45  | $7.08 \times 10^7$                    |
| (ind) <sub>2</sub> CH <sup>+</sup> | -8.76  | $1.89 \times 10^8$                    |
| (pyr) <sub>2</sub> CH <sup>+</sup> | -7.69  | $1.08 \times 10^9$ <sup>a</sup>       |

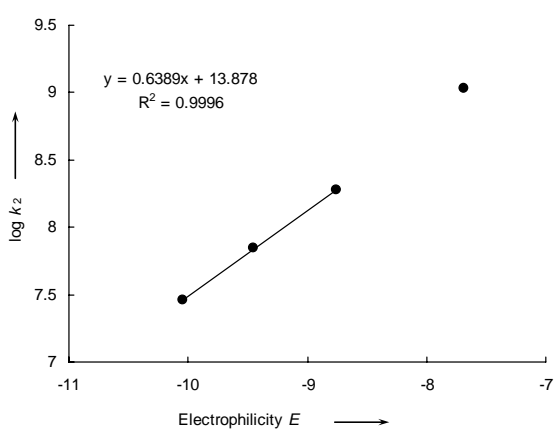

$$N = 21.72$$

$$s_N = 0.64$$

<sup>a</sup> Because of the proximity of the diffusion limit,  
 not used for the calculation of  $N$  and  $s_N$ .

### Kinetics of the reaction of **4** with $\text{Ar}_2\text{CH}^+$ .

Rate constants for the reactions of potassium potassium hexane-1-thiolate (**4**) with  $(\text{liI})_2\text{CH}^+$  in  $\text{CH}_3\text{CN}$  (20 °C, laser-flash photolysis techniques,  $\lambda = 632 \text{ nm}$ ).

| $[\text{Ar}_2\text{CH}^+] / \text{mol L}^{-1}$ | $[\text{Nu}] / \text{mol L}^{-1}$ | $[\text{18-C-6}] / \text{mol L}^{-1}$ | $k_{\text{obs}} / \text{s}^{-1}$ |
|------------------------------------------------|-----------------------------------|---------------------------------------|----------------------------------|
| $1.25 \times 10^{-5}$                          | $3.41 \times 10^{-4}$             | $3.41 \times 10^{-4}$                 | $2.87 \times 10^4$               |
| $1.25 \times 10^{-5}$                          | $6.82 \times 10^{-4}$             | $6.82 \times 10^{-4}$                 | $4.76 \times 10^4$               |
| $1.25 \times 10^{-5}$                          | $1.02 \times 10^{-3}$             | $1.02 \times 10^{-3}$                 | $6.68 \times 10^4$               |
| $1.25 \times 10^{-5}$                          | $1.36 \times 10^{-3}$             | $1.36 \times 10^{-3}$                 | $1.23 \times 10^5$               |
| $1.25 \times 10^{-5}$                          | $1.71 \times 10^{-3}$             | $1.71 \times 10^{-3}$                 | $1.22 \times 10^5$               |

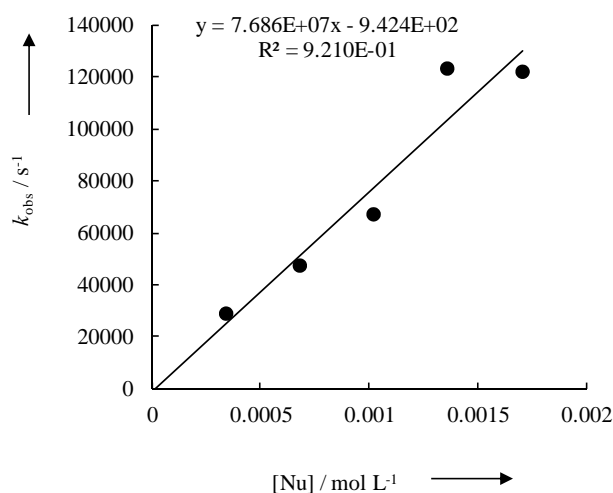

$$k = 7.87 \times 10^7 \text{ M}^{-1} \text{ s}^{-1}$$

Rate constants for the reactions of potassium potassium hexane-1-thiolate (**4**) with  $(\text{jul})_2\text{CH}^+$  in  $\text{CH}_3\text{CN}$  (20 °C, laser-flash photolysis techniques,  $\lambda = 640 \text{ nm}$ ).

| $[\text{Ar}_2\text{CH}^+] / \text{mol L}^{-1}$ | $[\text{Nu}] / \text{mol L}^{-1}$ | $[\text{18-C-6}] / \text{mol L}^{-1}$ | $k_{\text{obs}} / \text{s}^{-1}$ |
|------------------------------------------------|-----------------------------------|---------------------------------------|----------------------------------|
| $1.26 \times 10^{-5}$                          | $1.59 \times 10^{-4}$             | $1.63 \times 10^{-4}$                 | $2.37 \times 10^4$               |
| $1.26 \times 10^{-5}$                          | $6.36 \times 10^{-4}$             | $6.51 \times 10^{-4}$                 | $7.20 \times 10^4$               |
| $1.26 \times 10^{-5}$                          | $9.54 \times 10^{-4}$             | $9.76 \times 10^{-4}$                 | $9.22 \times 10^4$               |
| $1.26 \times 10^{-5}$                          | $1.27 \times 10^{-3}$             | $1.30 \times 10^{-3}$                 | $1.14 \times 10^5$               |
| $1.26 \times 10^{-5}$                          | $1.59 \times 10^{-3}$             | $1.63 \times 10^{-3}$                 | $1.78 \times 10^5$               |
| $1.26 \times 10^{-5}$                          | $1.91 \times 10^{-3}$             | $1.95 \times 10^{-3}$                 | $2.14 \times 10^5$               |

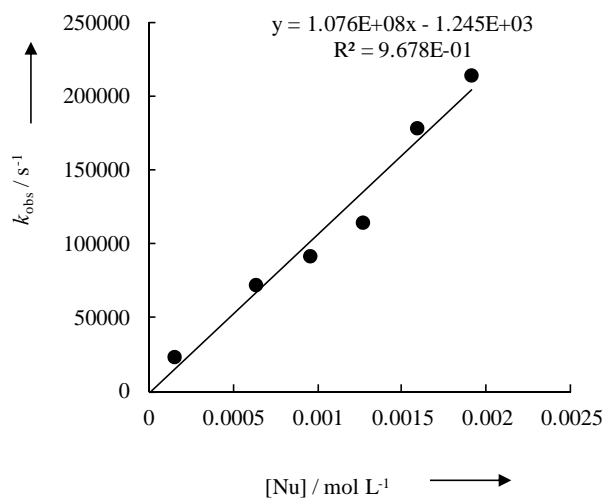

$$k = 1.08 \times 10^8 \text{ M}^{-1} \text{ s}^{-1}$$

## 4. References

- S1. H. Mayr, T. Bug, M. F. Gotta, N. Hering, B. Irrgang, B. Janker, B. Kempf, R. Loos, A. R. Ofial, G. Remennikov and H. Schimmel, *J. Am. Chem. Soc.*, 2001, **123**, 9500–9512.
- S2. B. Kempf and H. Mayr, *Chem. Eur. J.*, 2005, **11**, 917–927.
- S3. (a) B. Denegri, A. Streiter, S. Juric, A. R. Ofial, O. Kronja and H. Mayr, *Chem.–Eur. J.*, 2006, **12**, 1648–1656. (b) M. Baidya, S. Kobayashi, F. Brotzel, U. Schmidhammer, E. Riedle and H. Mayr, *Angew. Chem. Int. Ed.*, 2006, **46**, 6176–6179.
- S4. Ö. Güzel and A. Salman, *Bioorg. Med. Chem.*, 2006, **14**, 7804–7815.
- S5. D. E. Laycock and H. Alper, *J. Org. Chem.*, 1981, **46**, 289–293.

## 5. Copies of NMR and IR spectra

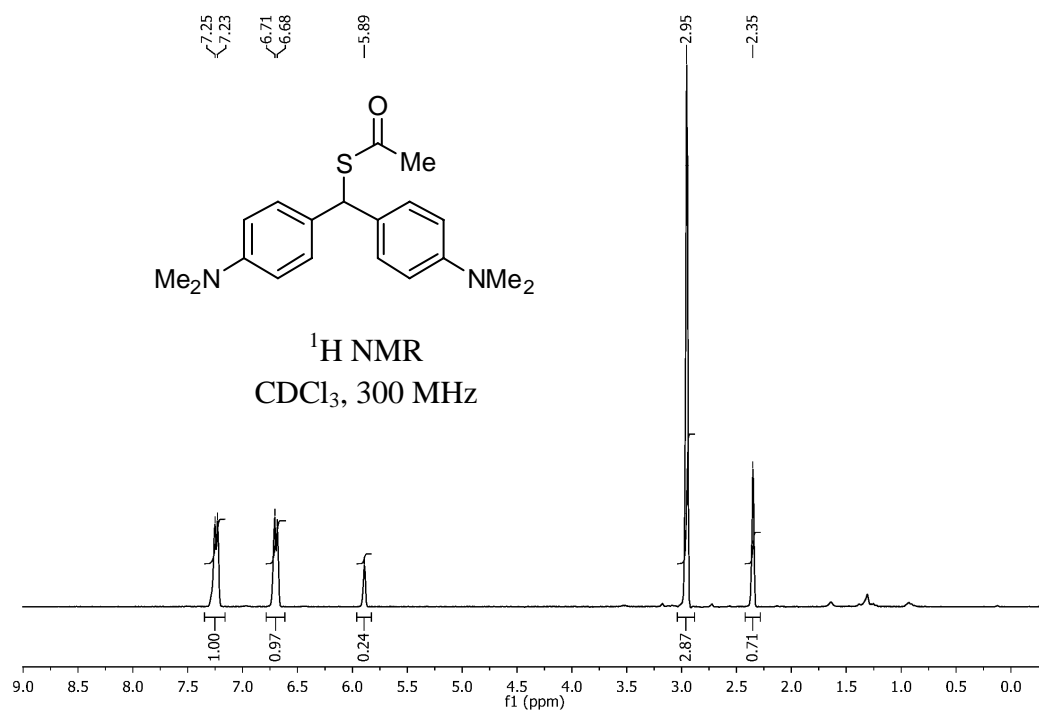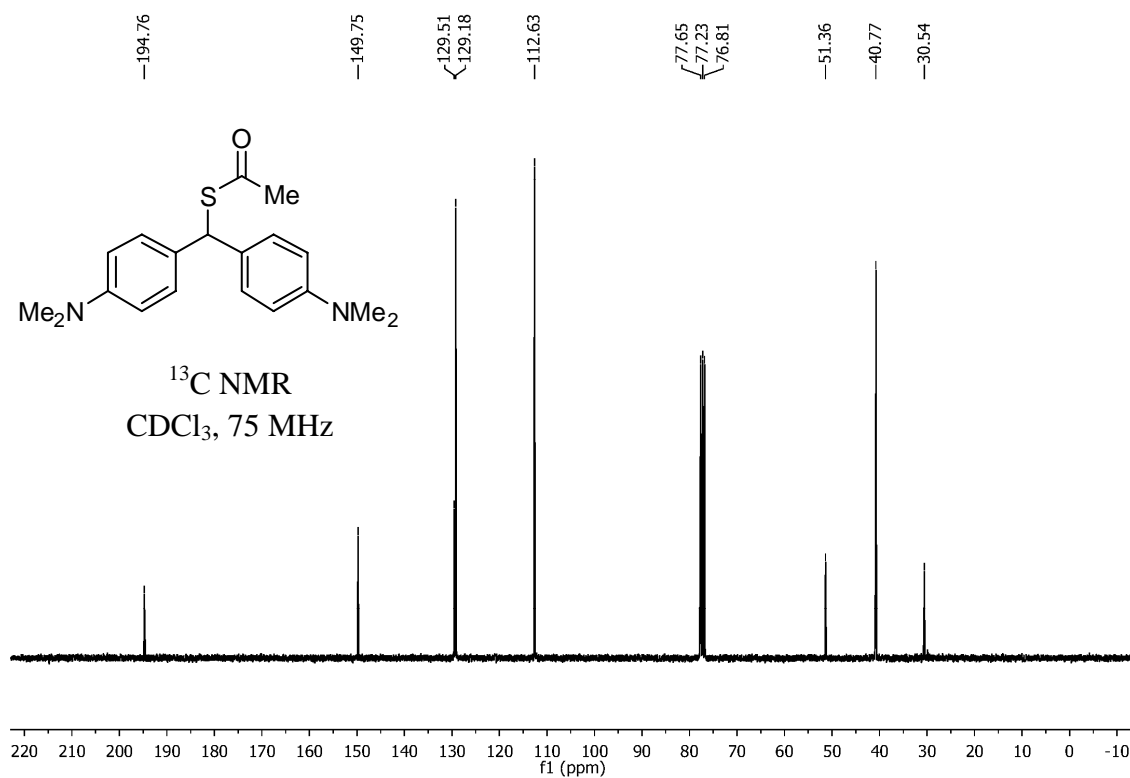



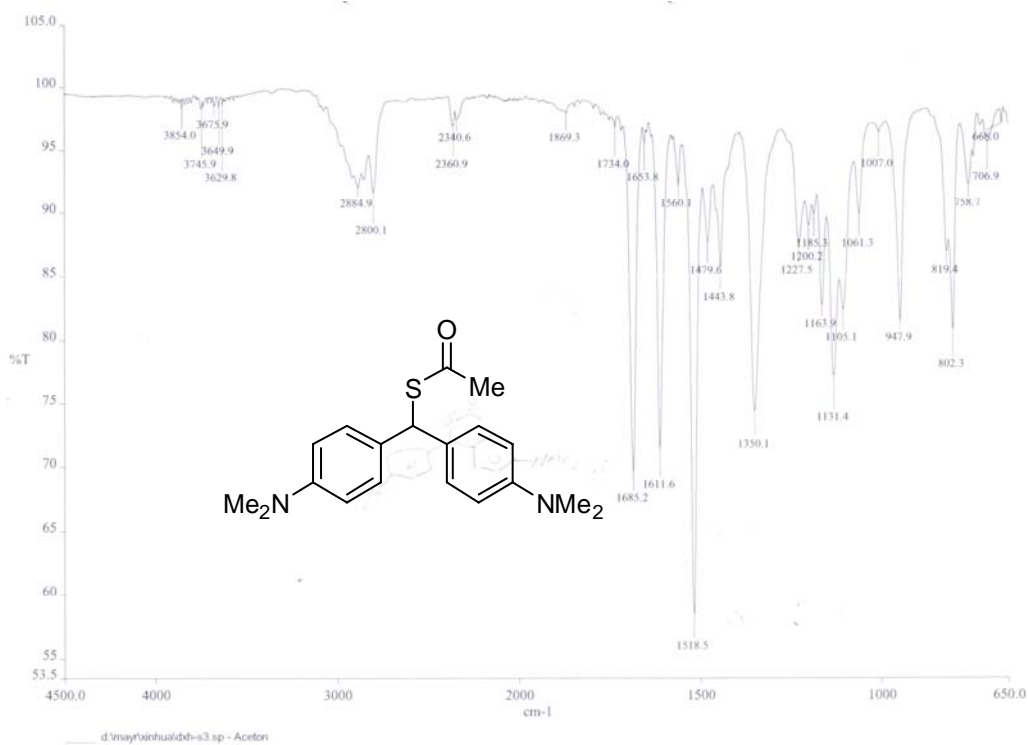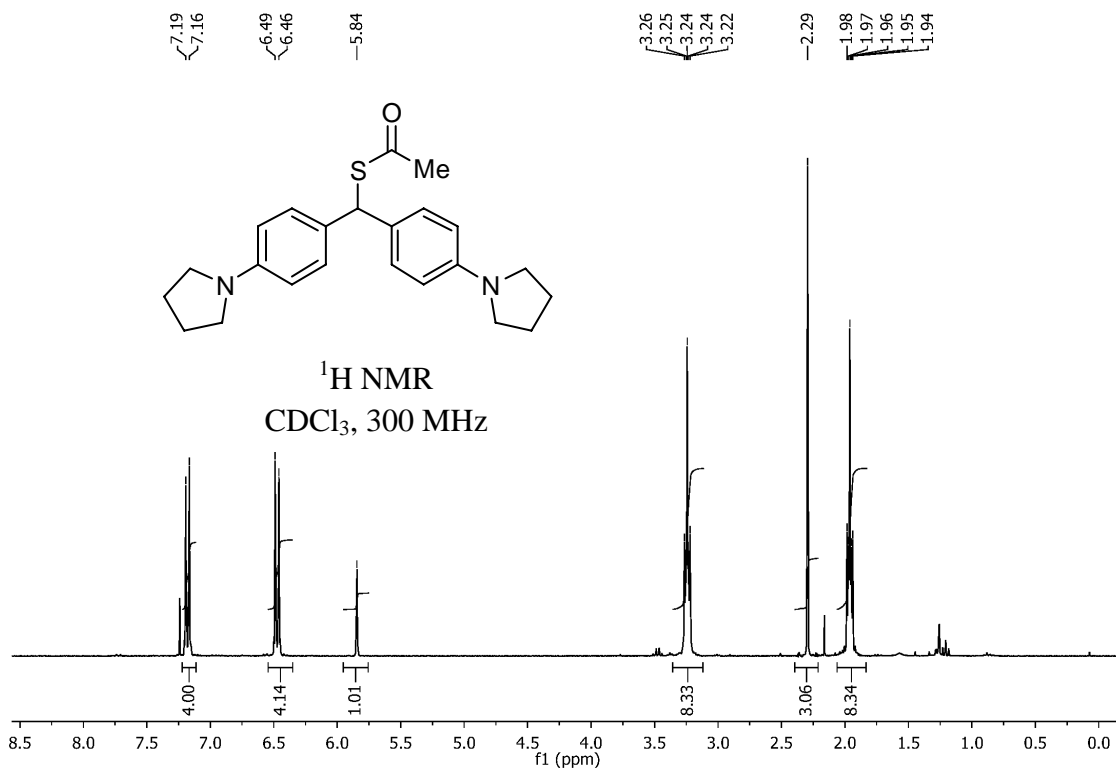

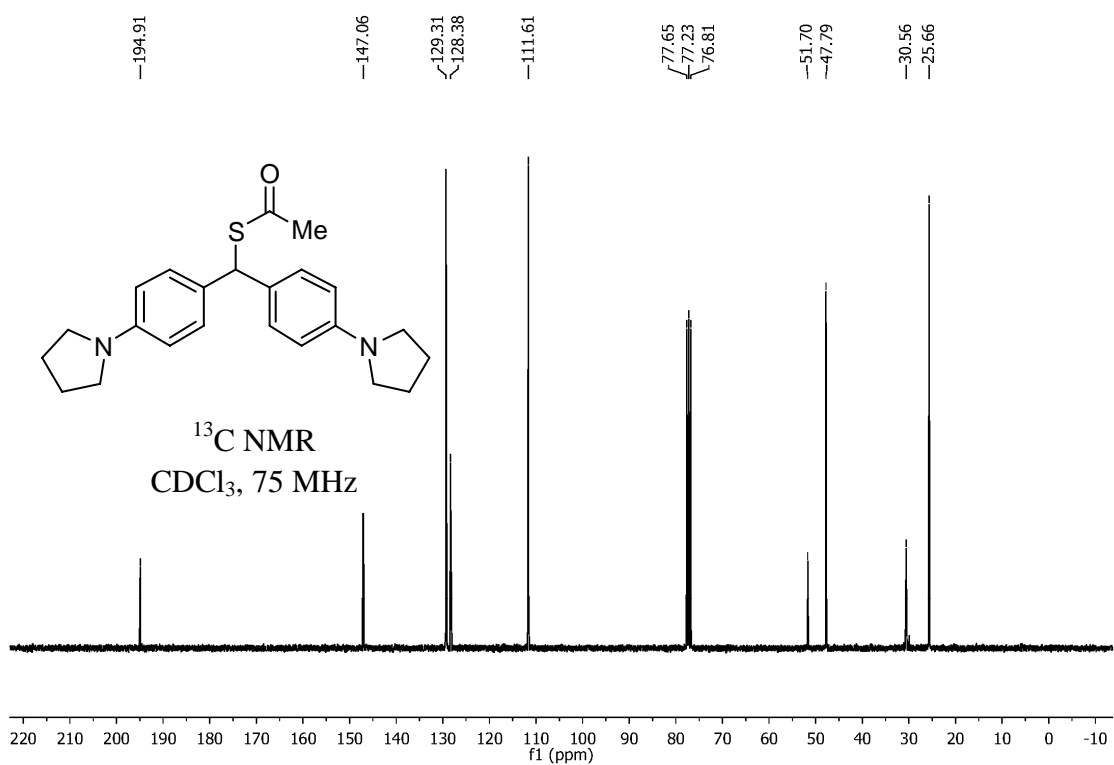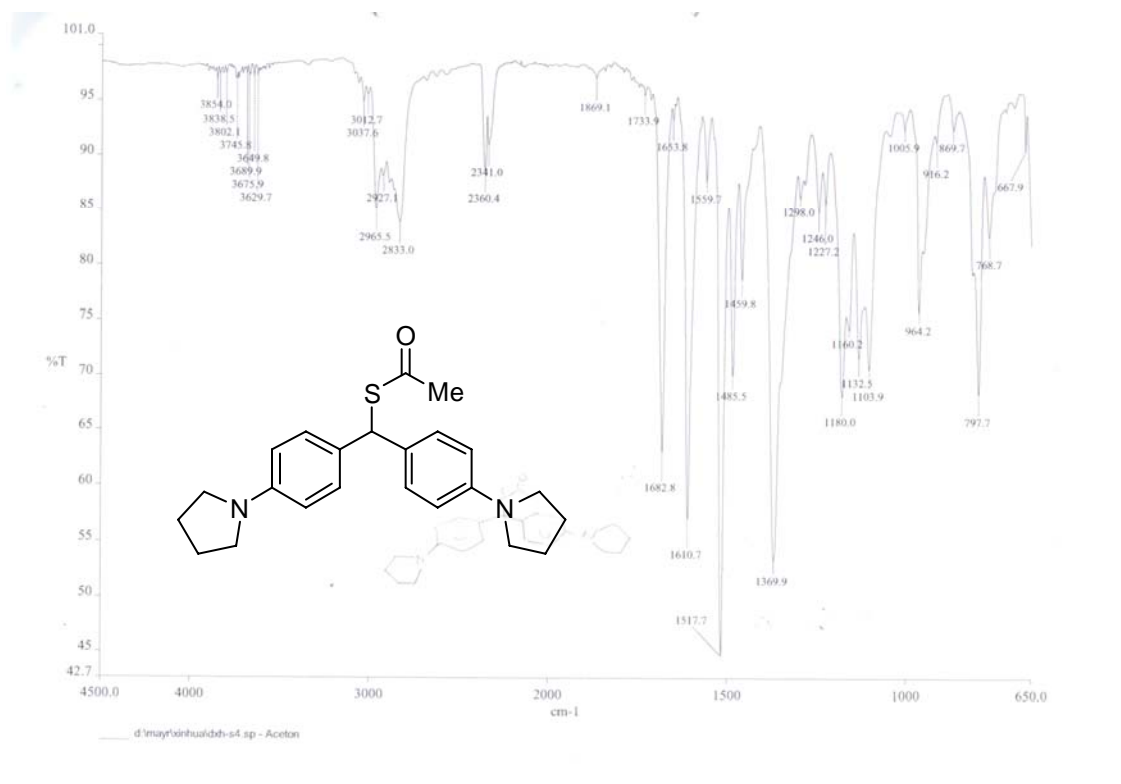

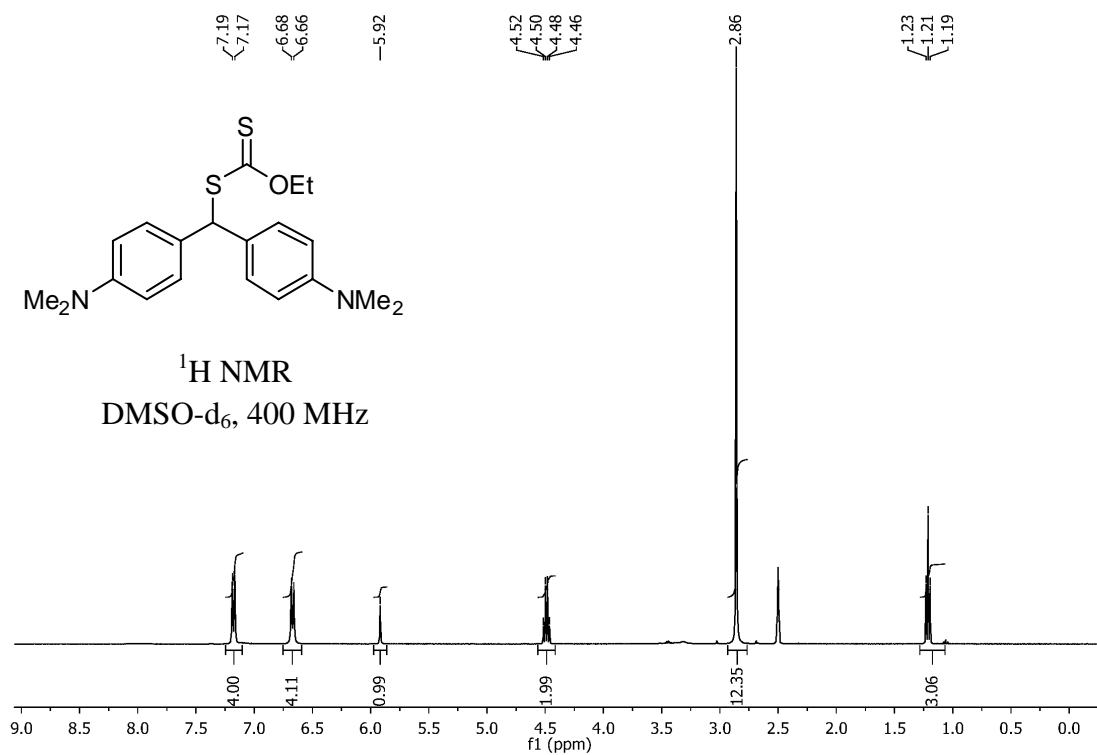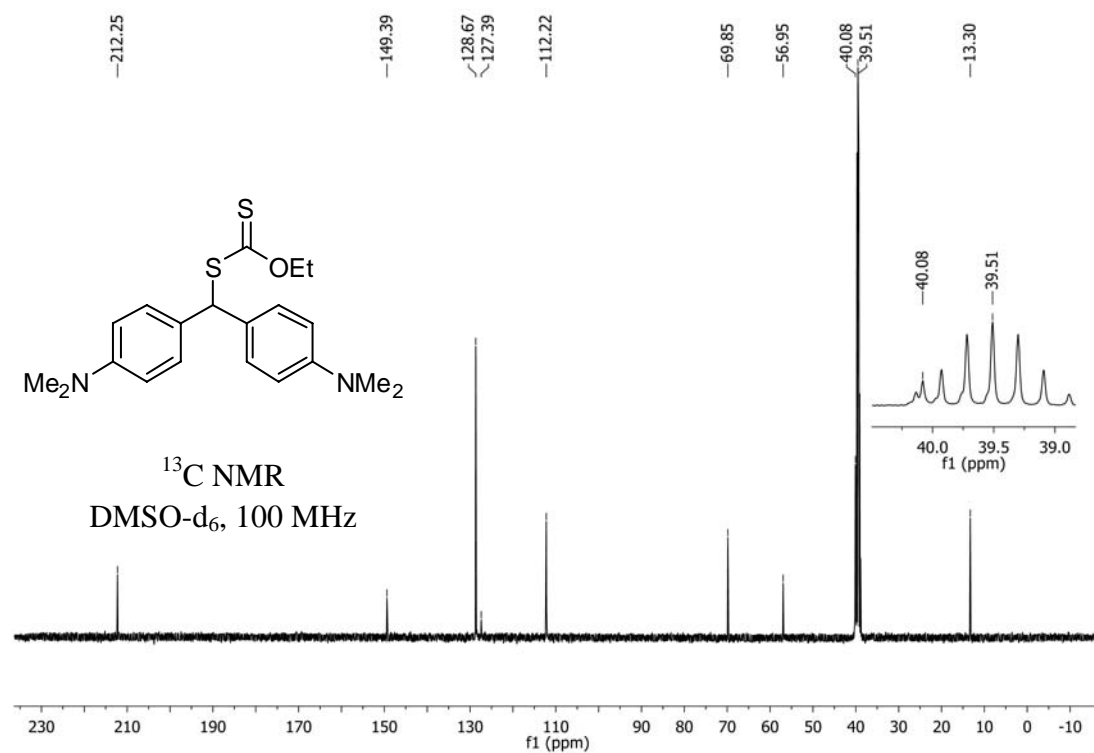

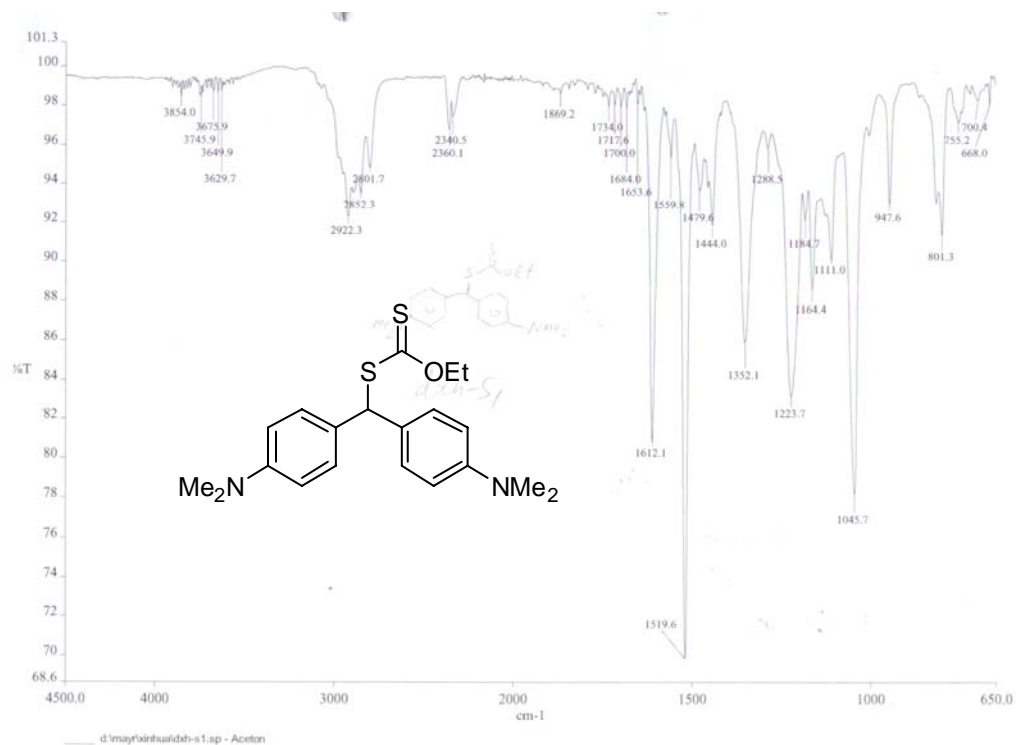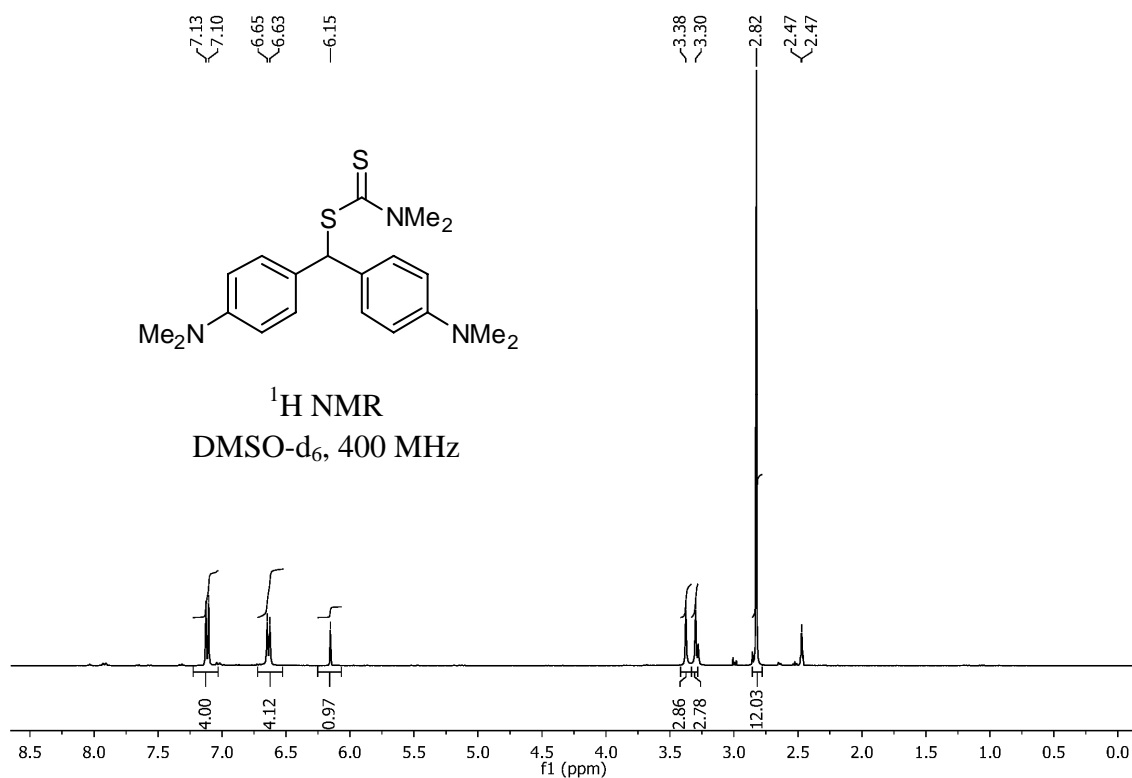

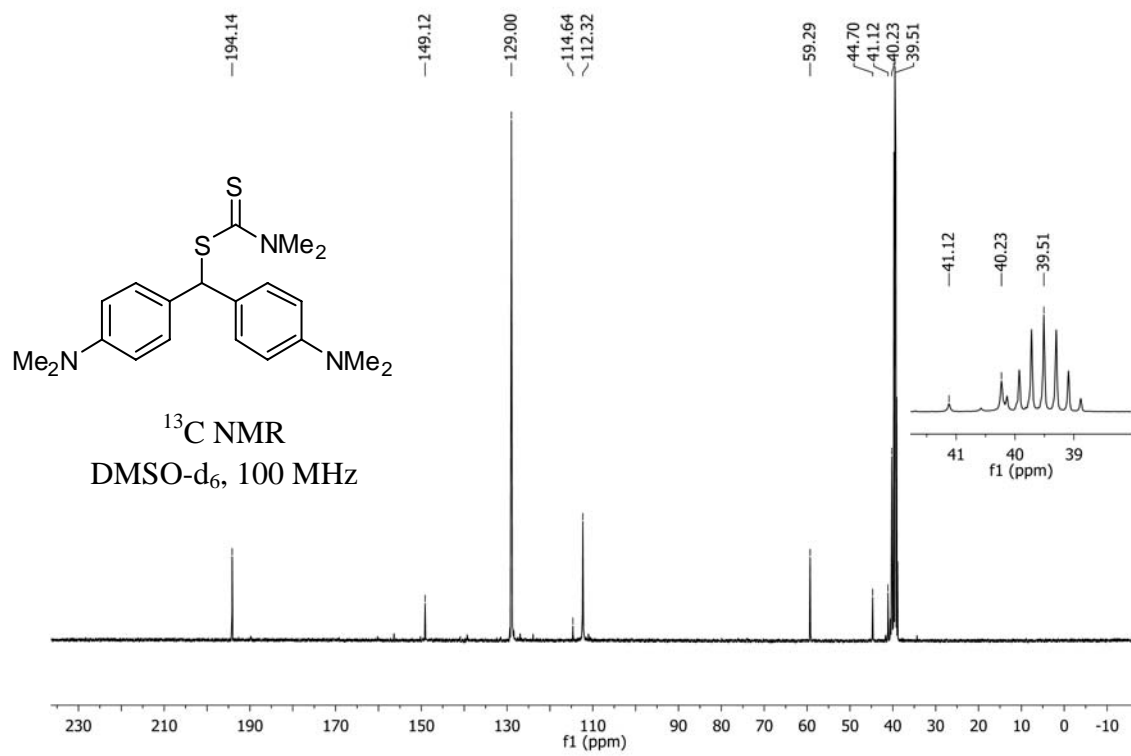

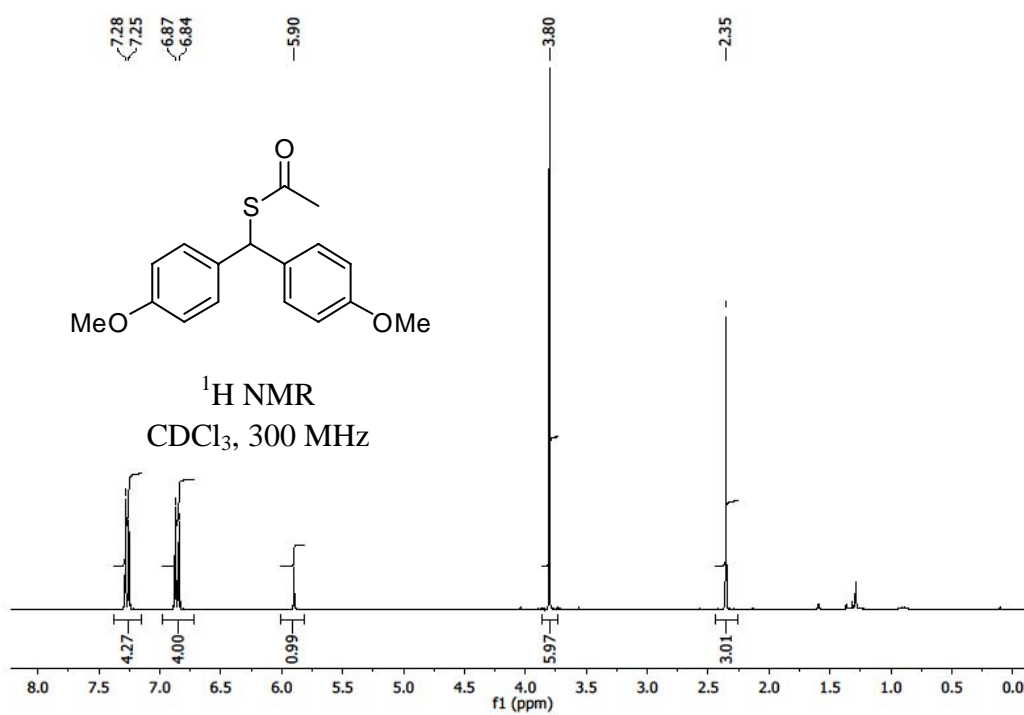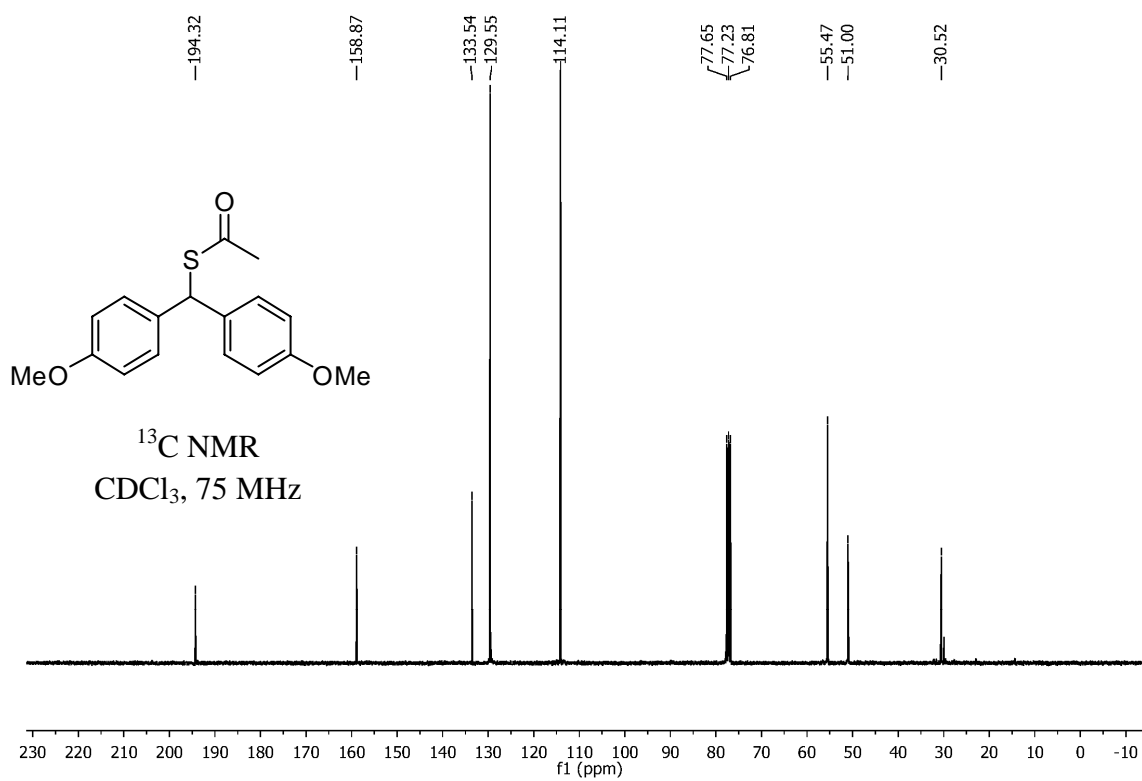

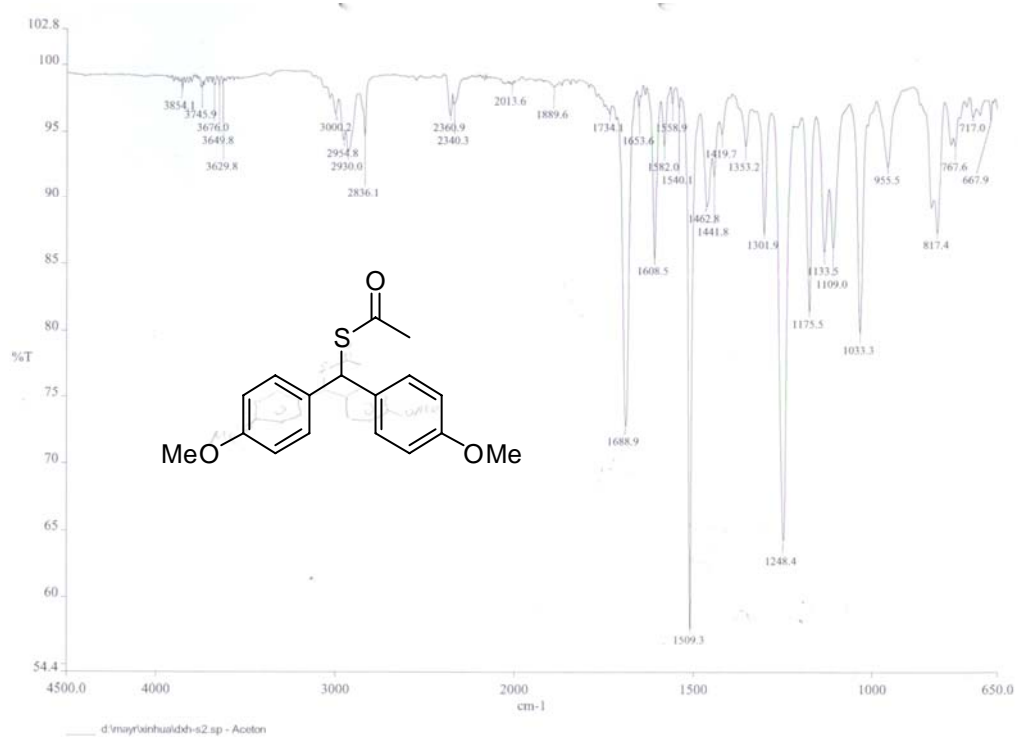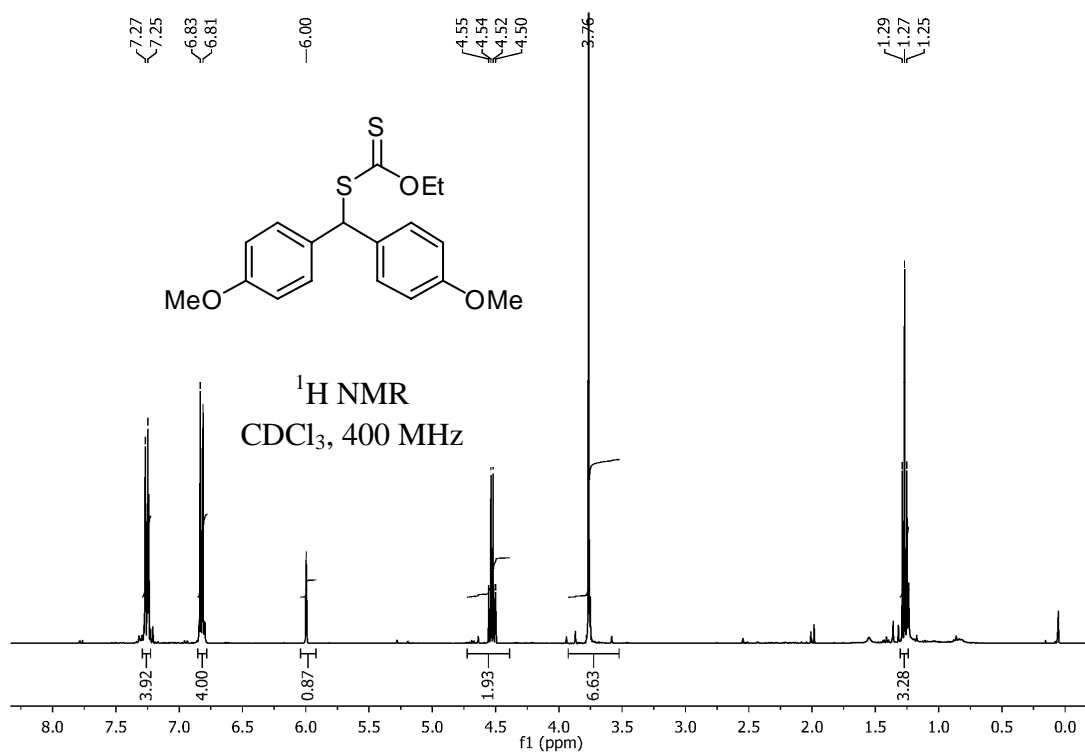

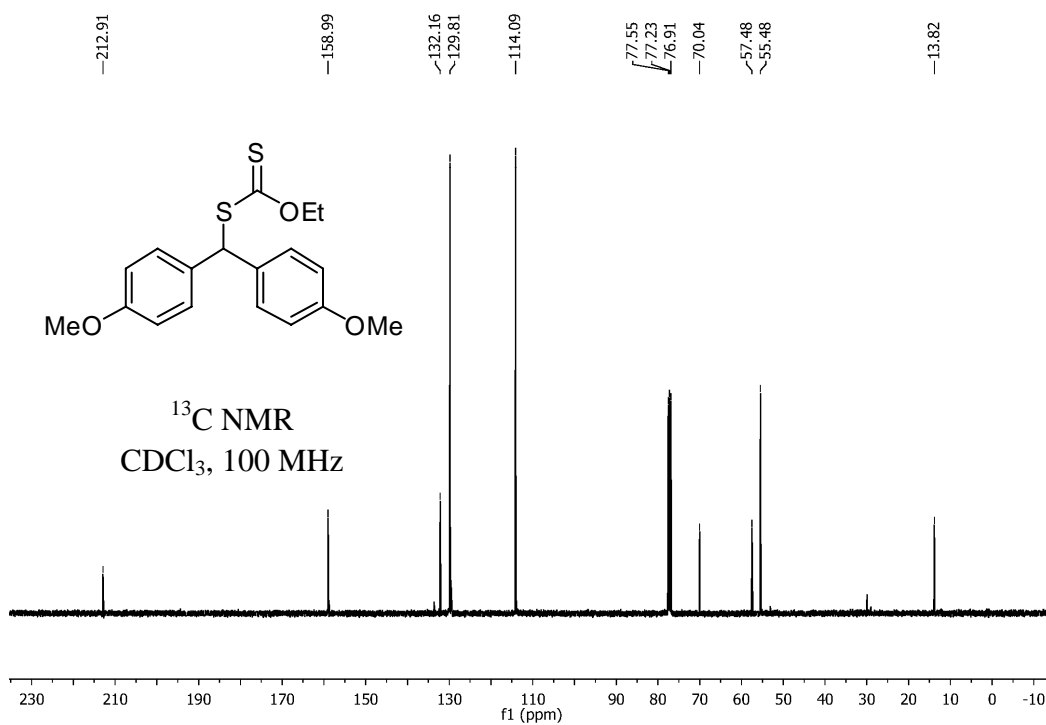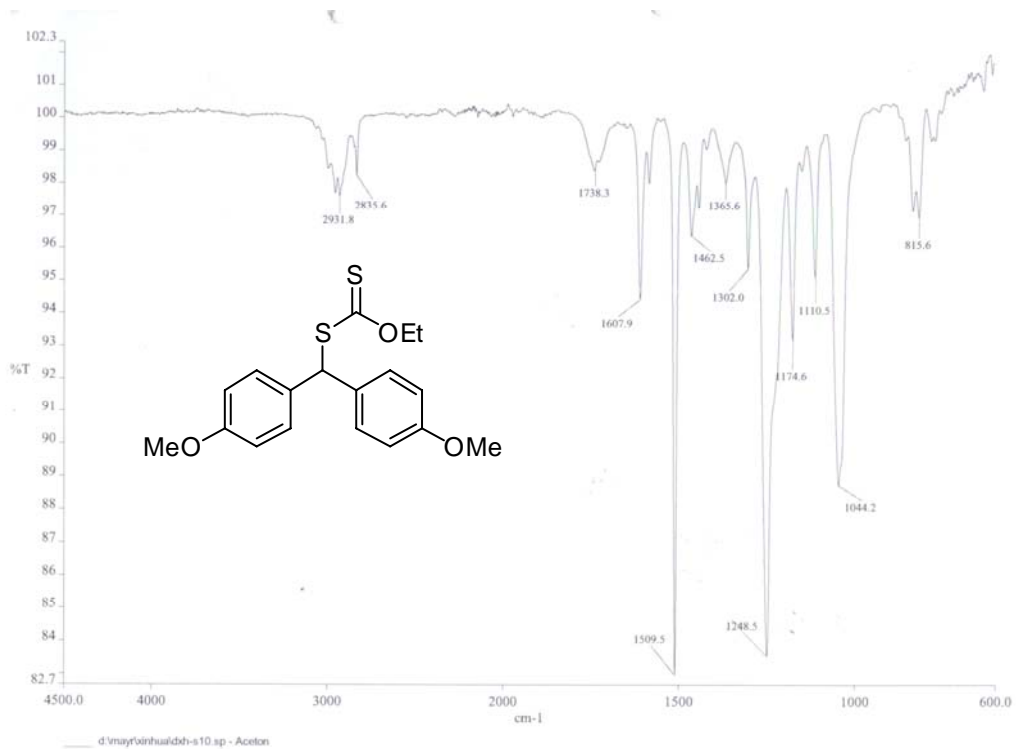



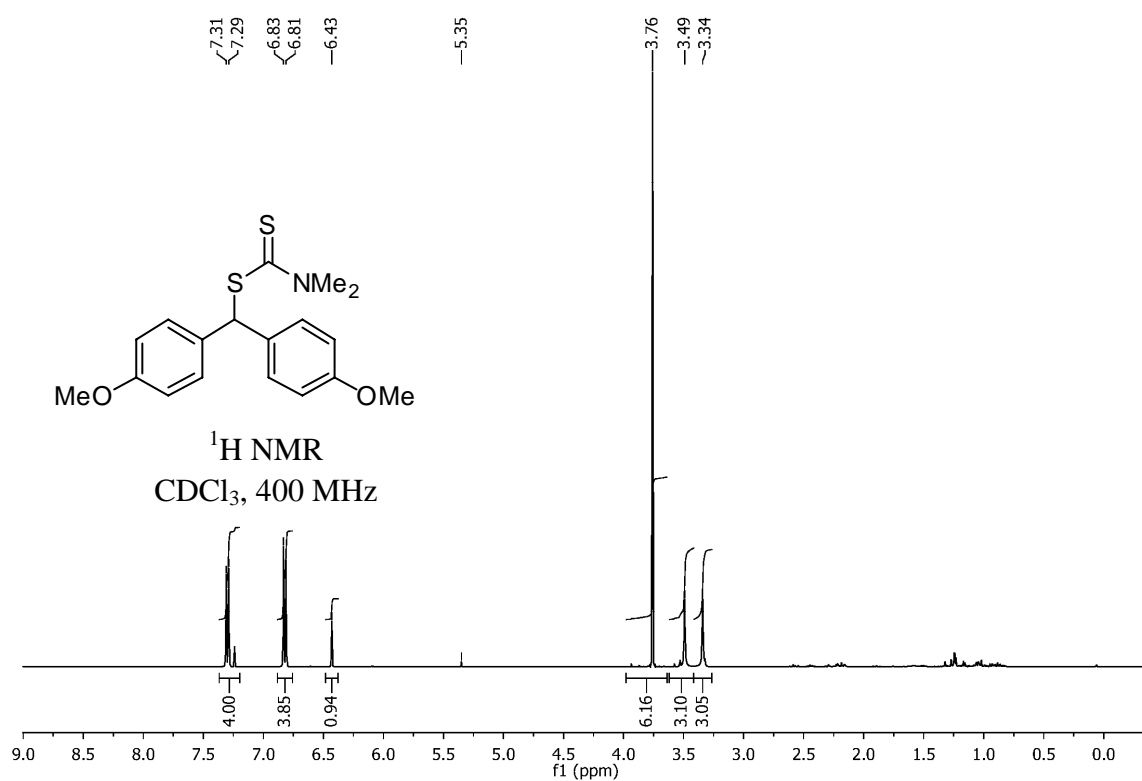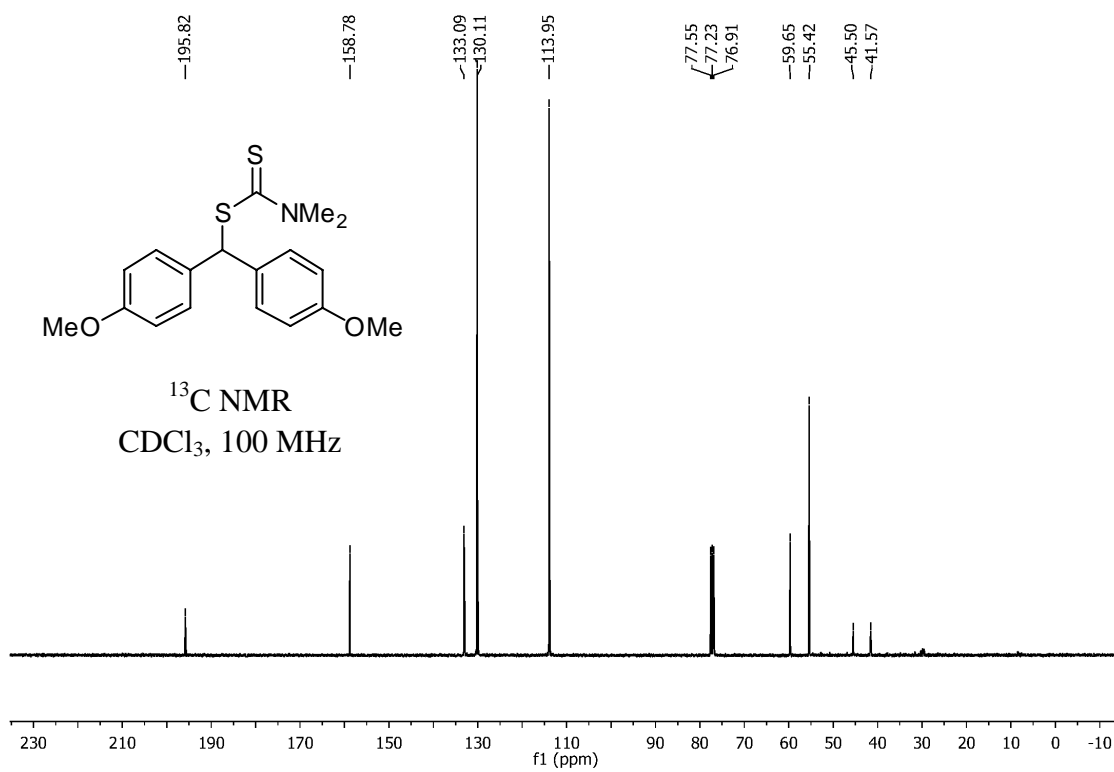

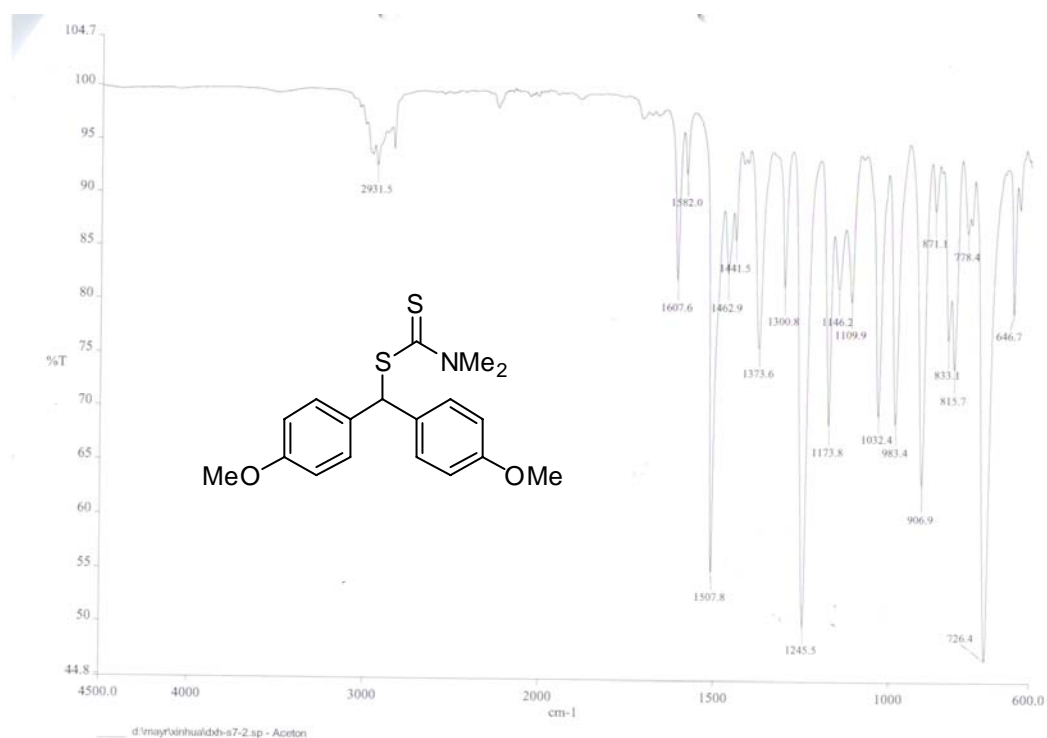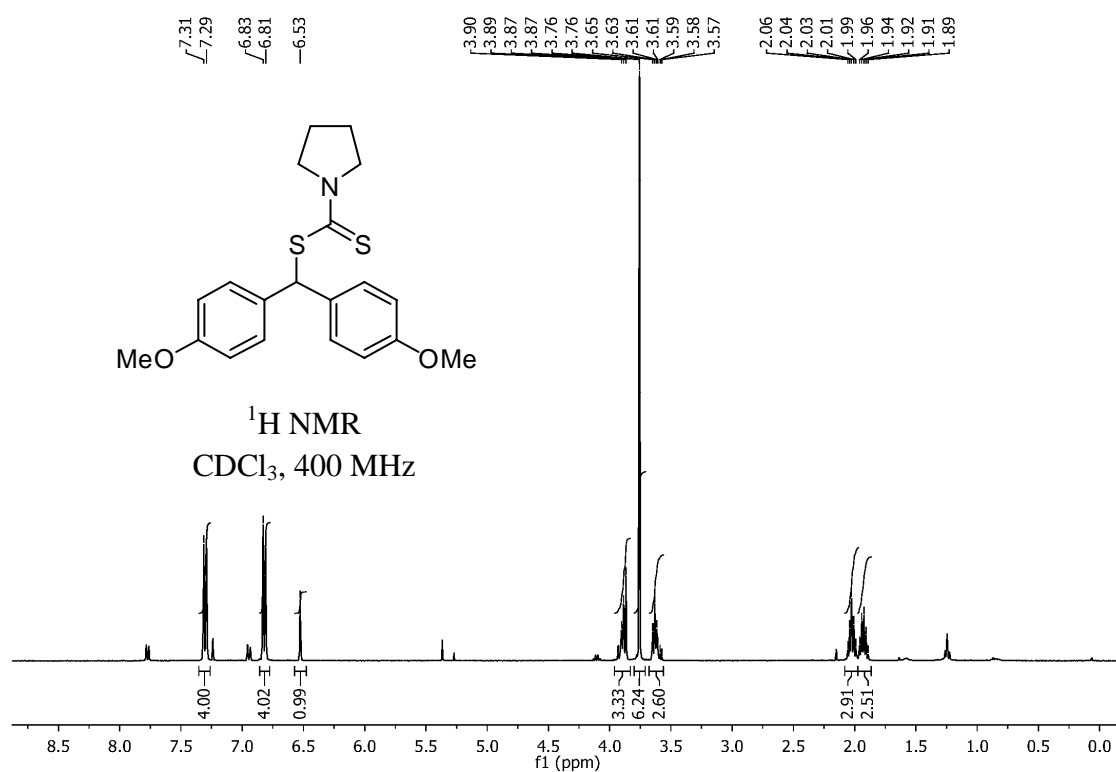

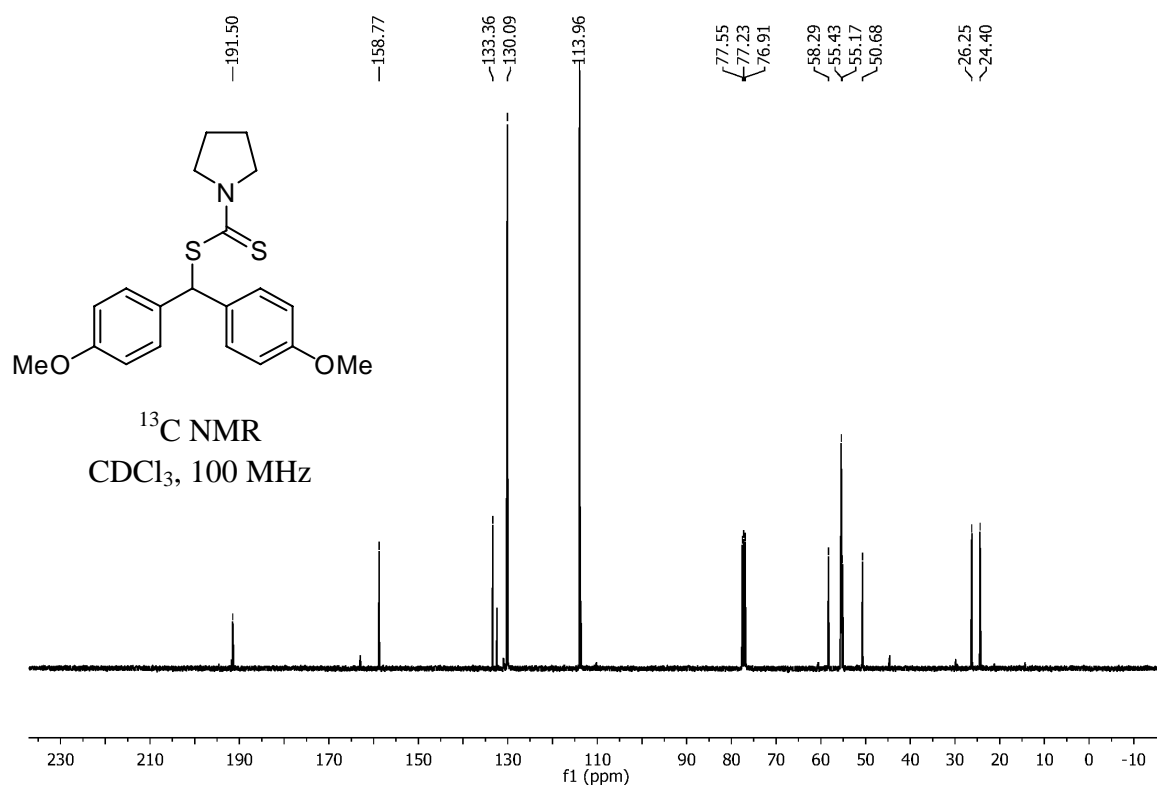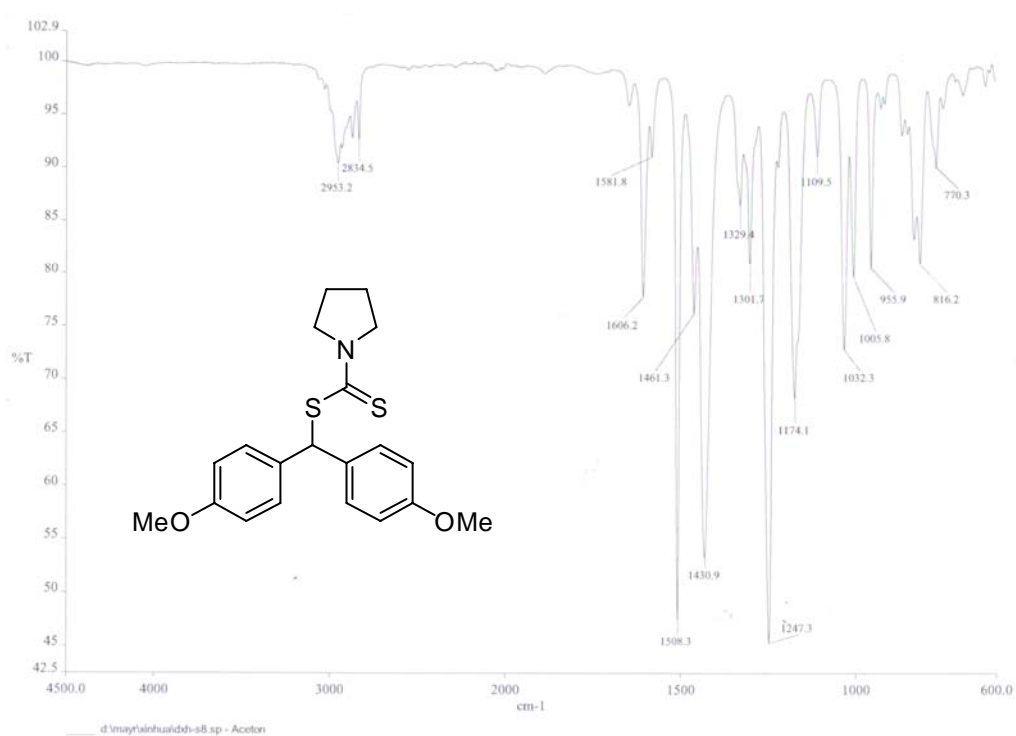

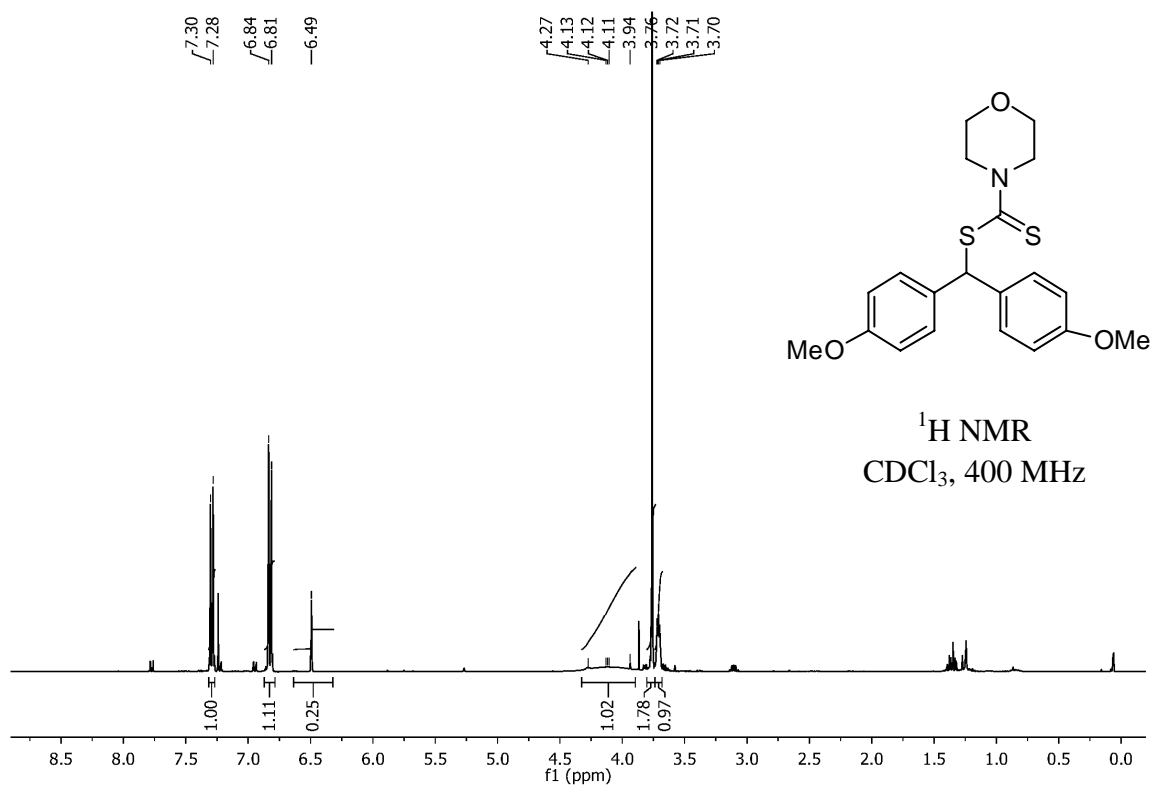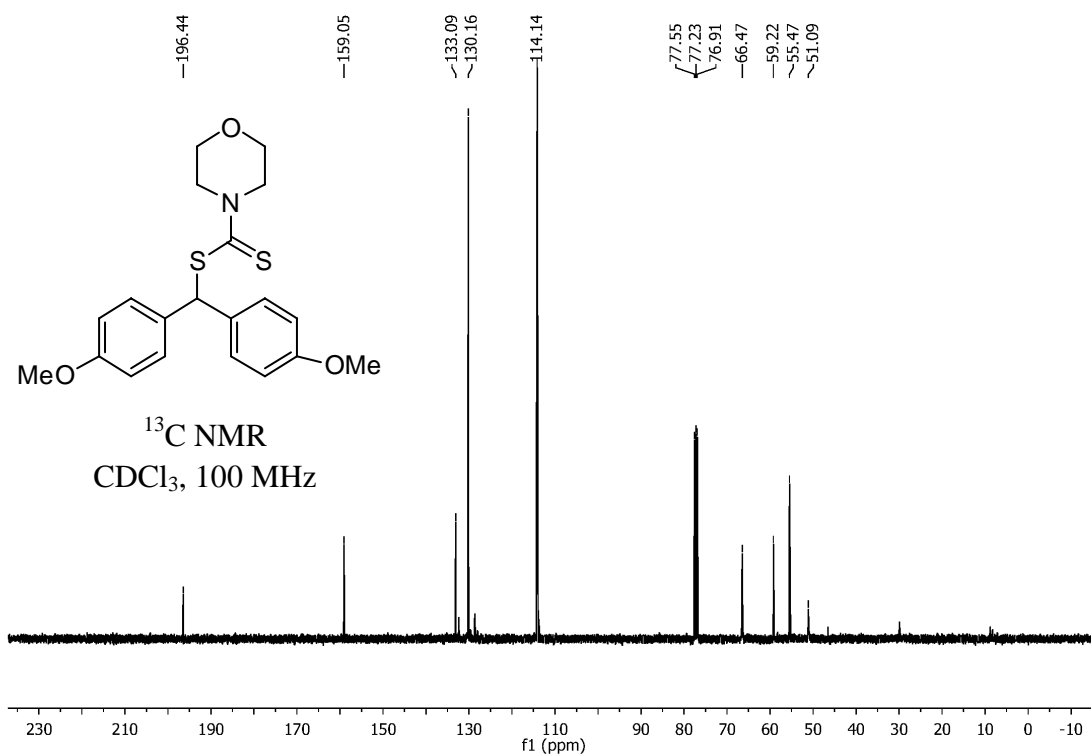

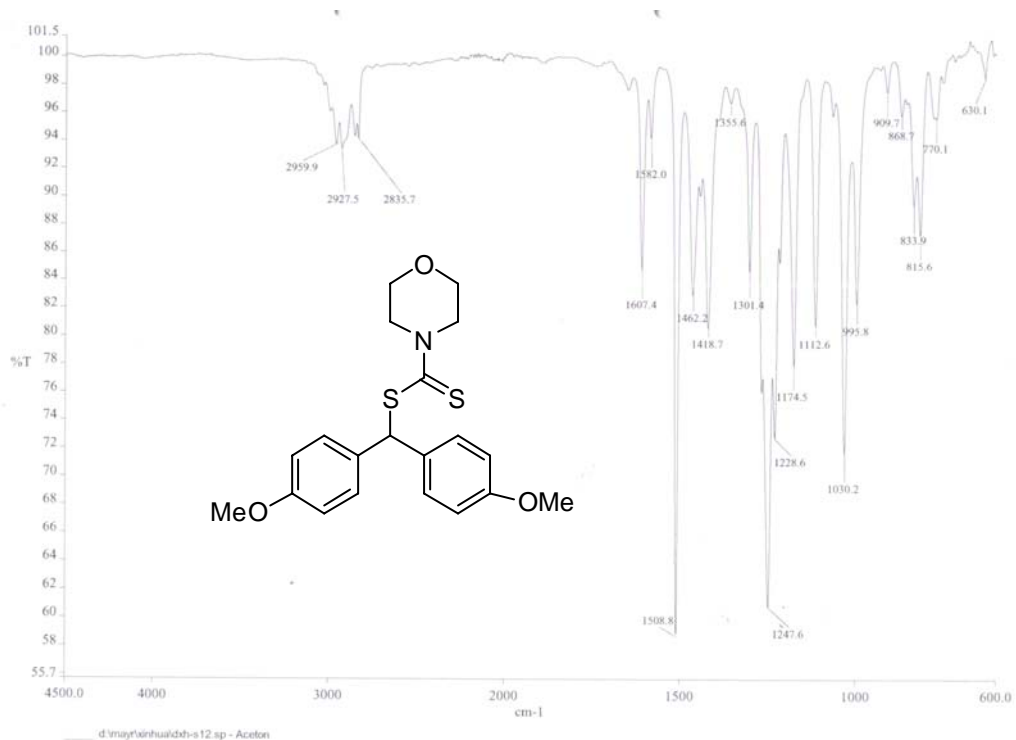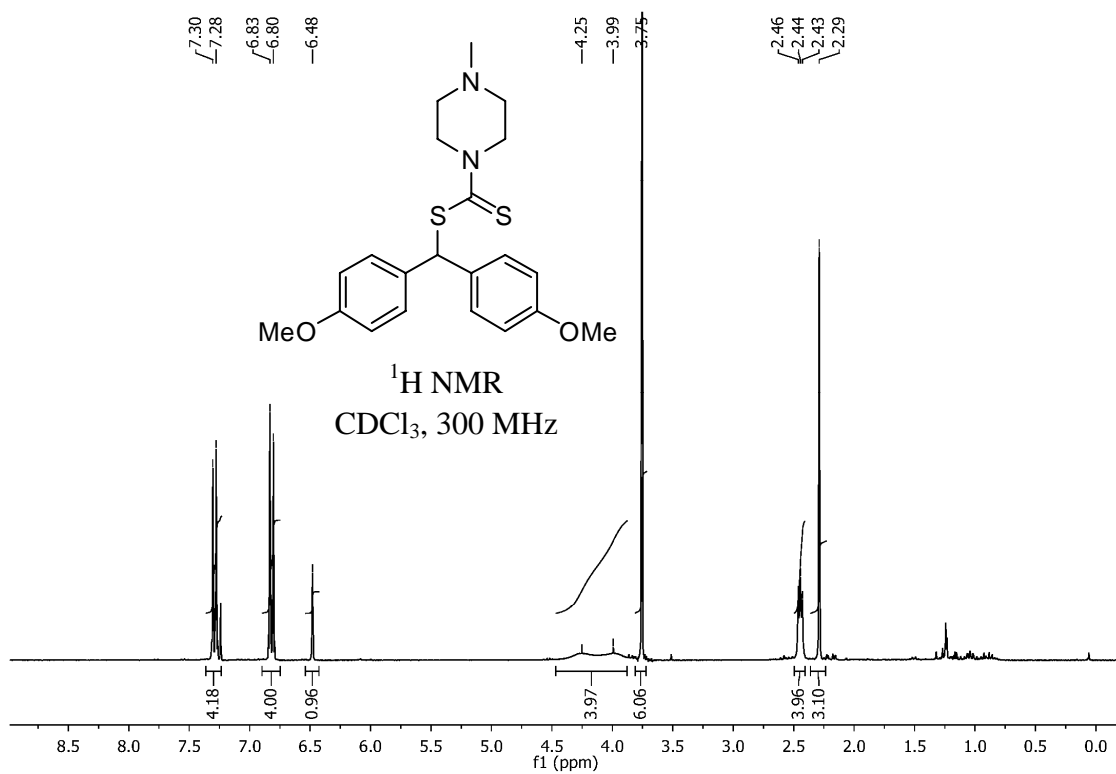

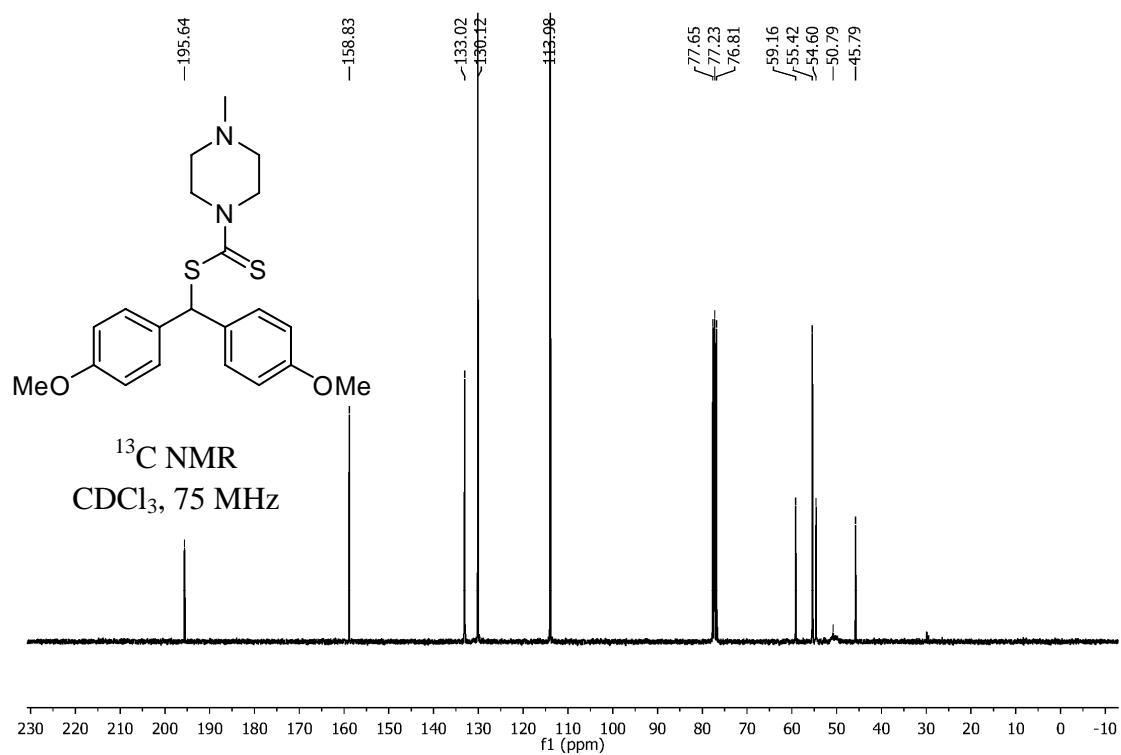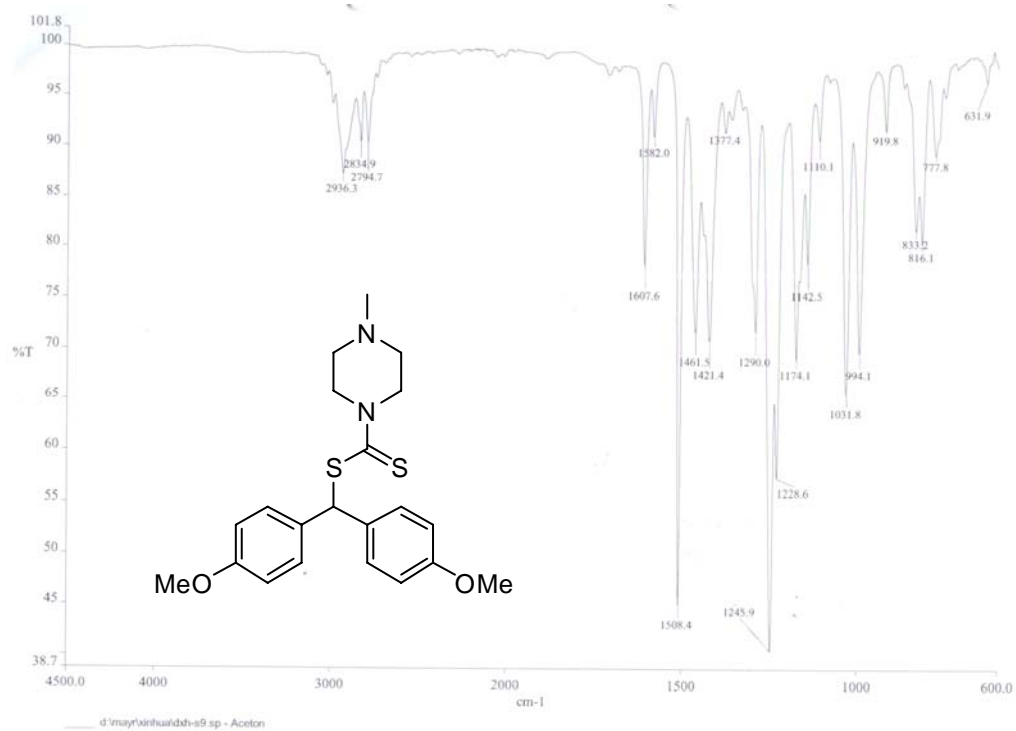

Supplement: c1ob06245j.pdf [file c1ob06245j.pdf]
